# Supplementary material for: [4+1] cyclization of α-diazo esters and mesoionic N-heterocyclic olefins
Source: Royal Society of Chemistry journal article supplement (doi:10.1039/d3cc01139a), 2023-01-01
Supplement: d3cc01139a1.pdf [file d3cc01139a1.pdf]

## Electronic Supplementary Information

# [4+1] Cyclization of $\alpha$ -Diazo Esters and Mesoionic *N*-Heterocyclic Olefins

Qiuming Liang,<sup>\*a,c</sup> Yimin Zeng,<sup>a</sup> Pedro Armando Mendez Ocampo,<sup>a</sup> Hui Zhu,<sup>b</sup> Zheng-Wang Qu,<sup>\*b</sup>  
Stefan Grimme<sup>b</sup> and Datong Song<sup>\*a</sup>

<sup>a</sup> *Davenport Chemical Research Laboratories, Department of Chemistry, University of Toronto, 80 St. George Street, Toronto, Ontario, Canada, M5S 3H6.*

<sup>b</sup> *Mulliken Center for Theoretical Chemistry, University of Bonn, Beringstr. 4, 53115 Bonn, Germany*

<sup>c</sup> *School of Science and Institute of Scientific Research, Great Bay University, Dongguan 523000, China*

E-mail: [d.song@utoronto.ca](mailto:d.song@utoronto.ca)

E-mail: [qu@thch.uni-bonn.de](mailto:qu@thch.uni-bonn.de)

E-mail: [qliang@gbu.edu.cn](mailto:qliang@gbu.edu.cn)

|                                                                      |     |
|----------------------------------------------------------------------|-----|
| 1. Experimental section.....                                         | S2  |
| 2. NMR spectra.....                                                  | S16 |
| 3. NMR spectra of reaction between 1a and 2a at low temperature..... | S41 |
| 4. X-ray crystallography.....                                        | S44 |
| 5. Computation.....                                                  | S50 |
| 6. References.....                                                   | S93 |

## 1. Experimental section

All reactions were carried out in a dinitrogen-filled glovebox or using the standard Schlenk techniques under dinitrogen. Glassware was dried in a 180 °C oven overnight. Diethyl ether, hexanes and pentane solvents were dried by refluxing and distilling over sodium under dinitrogen. THF, benzene and toluene solvents were dried by refluxing and distilling over sodium benzophenone ketyl under dinitrogen. C<sub>6</sub>D<sub>6</sub> and THF-*d*<sub>8</sub> were degassed through three consecutive freeze–pump–thaw cycles. All solvents were stored over 3 Å molecular sieves prior to use. Unless otherwise noted, all NMR spectra were recorded at 25 °C on an Agilent DD2 600 MHz spectrometer or an Agilent DD2 500 MHz spectrometer with <sup>13</sup>C-sensitive cryogenically cooled probe. Chemical shifts are referenced to the solvent signals. The NMR signal assignments were made based on <sup>1</sup>H-COSY, <sup>1</sup>H-<sup>13</sup>C-HSQC, and <sup>1</sup>H-<sup>13</sup>C-HMBC NMR spectroscopy. Elemental analyses were carried out at the ANALEST at the University of Toronto. High-resolution mass spectrograms were recorded at the AIMS Mass Spectrometry Laboratory at the University of Toronto. Unless otherwise noted, all chemicals were purchased from commercial sources and used as received. Compounds **1a-d**,<sup>1,2</sup> **2a-i**,<sup>3,4</sup> **7**,<sup>5</sup> **I**,<sup>6</sup> **II**,<sup>7</sup> **III**,<sup>8</sup> **V**,<sup>9</sup> **9**,<sup>9</sup> 1,3-bis(2,6-diisopropylphenyl)-5-phenyl-1,2,3-triazolium hexafluorophosphate<sup>10</sup> and 1,3-bis(2,6-diisopropylphenyl)-2,4-diphenylimidazolium tetrafluoroborate<sup>11</sup> were synthesized according to the literature procedures.

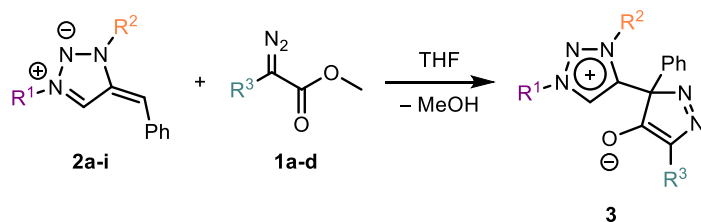

To a stirring solution of mNHO **2** (0.5 mmol) in THF (5 mL) was added  $\alpha$ -diazo ester **1** (0.55 mmol) in THF (2 mL). The reaction mixture instantaneously turned dark red. The reaction mixture was stirred for 3 h at room temperature. All volatiles were removed under reduced pressure. The residue was purified

by silica gel column chromatography eluted with acetone (0–20% gradient by volume) in DCM with 1% Et<sub>3</sub>N to afford the desired 3-(triazolium-4-yl)-(3*H*)-pyrazol-4-olates.

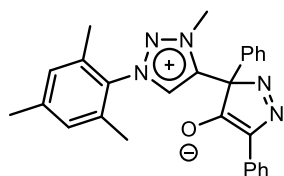

**3aa**

Yellow-orange solid. 169. mg, 77%. Crystals suitable for X-ray crystallography were obtained by vapor diffusion of *n*-pentane into a DCM solution at room temperature. <sup>1</sup>H NMR (500 MHz, CDCl<sub>3</sub>): δ 8.34 (s, 1H, triazolium-*H*), 8.25–

8.19 (m, 2H, Ph-*H*), 7.43–7.39 (m, 2H, Ph-*H*), 7.38–7.33 (m, 2H, Ph-*H*), 7.32–

7.28 (m, 3H, Ph-*H*), 7.07–7.01 (m, 3H, overlapping, Ph-*H* and Mes-*H*), 4.44 (s, 3H, N-CH<sub>3</sub>), 2.37 (s, 3H, Mes-CH<sub>3</sub>), 2.02 (s, 6H, Mes-CH<sub>3</sub>). <sup>13</sup>C NMR (126 MHz, CDCl<sub>3</sub>): δ 188.6 (CO<sup>-</sup>), 144.6 (triazolium-C), 143.0 (Mes-C), 135.3 (Ph-C), 135.0 (Ph-C), 134.1 (Mes-C), 131.2 (Mes-C), 131.1 (NC(Ph)=CO<sup>-</sup>), 131.0 (triazolium-C), 130.1 (Mes-C), 129.4 (Ph-C), 128.4 (Ph-C), 128.3 (Ph-C), 126.6 (Ph-C), 123.6 (Ph-C), 122.3 (Ph-C), 79.9 (quaternary C), 40.7 (N-CH<sub>3</sub>), 21.4 (Mes-CH<sub>3</sub>), 17.4 (Mes-CH<sub>3</sub>). HRMS (ESI): *m/z* calcd. for C<sub>27</sub>H<sub>26</sub>N<sub>5</sub>O [M+H]<sup>+</sup> 436.2133, found 436.2150.

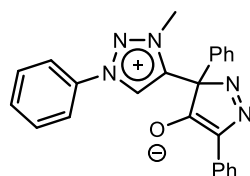

**3ab**

Yellow-orange solid. 158. mg, 81%. <sup>1</sup>H NMR (500 MHz, CDCl<sub>3</sub>) δ 8.95 (s, 1H, triazolium-*H*), 8.16–8.10 (m, 2H, Ph-*H*), 7.78–7.70 (m, 2H, Ph-*H*), 7.62–7.55 (m, 1H, Ph-*H*), 7.57–7.50 (m, 2H, Ph-*H*), 7.44–7.38 (m, 2H, Ph-*H*), 7.34–7.25 (m, 5H, Ph-*H*), 7.06 (tt, *J* = 7.4, 1.3 Hz, 1H, Ph-*H*), 4.37 (s, 3H, N-CH<sub>3</sub>).

<sup>13</sup>C NMR (126

MHz, CDCl<sub>3</sub>) δ 189.19 (CO<sup>-</sup>), 144.0 (triazolium-C), 134.7 (Ph-C), 134.5 (Ph-C), 134.3 (Ph-C), 132.3 (Ph-C), 131.8 (NC(Ph)=CO<sup>-</sup>), 130.6 (Ph-C), 129.4 (Ph-C), 128.6 (Ph-C), 128.3 (Ph-C), 127.6 (triazolium-C), 127.0 (Ph-C), 124.3 (Ph-C), 122.7 (Ph-C), 121.3 (Ph-C), 79.1 (quaternary C), 40.8 (N-CH<sub>3</sub>). HRMS (ESI): *m/z* calcd. for C<sub>24</sub>H<sub>20</sub>N<sub>5</sub>O [M+H]<sup>+</sup> 394.1649, found 394.1659.

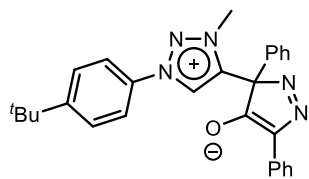

**3ac**

Yellow solid. 180. mg, 80%.  $^1\text{H}$  NMR (500 MHz,  $\text{CDCl}_3$ ):  $\delta$  8.87 (s, 1H, triazolium-*H*), 8.19–8.13 (m, 2H, Ph-*H*), 7.65–7.59 (m, 2H, *t*Bu- $\text{C}_6\text{H}_4$ ), 7.53–7.46 (m, 2H, *t*Bu- $\text{C}_6\text{H}_4$ ), 7.40–7.34 (m, 2H, Ph-*H*), 7.32–7.22 (m, 5H, Ph-*H*), 7.06–6.99 (m, 1H, Ph-*H*), 4.38 (s, 3H, N- $\text{CH}_3$ ), 1.32 (s, 9H,  $\text{C}(\text{CH}_3)_3$ ).  $^{13}\text{C}$  NMR (126 MHz,  $\text{CDCl}_3$ ):  $\delta$  188.6 ( $\text{CO}^-$ ), 156.1 (*t*Bu- $\text{C}_6\text{H}_4$ ), 144.1 (triazolium-*C*), 135.1 (Ph-*C*), 134.9 (Ph-*C*), 132.3 (*t*Bu- $\text{C}_6\text{H}_4$ ), 130.9 ( $\text{NC}(\text{Ph})=\text{CO}^-$ ), 129.3 (Ph-*C*), 128.3 (Ph-*C*), 128.2 (Ph-*C*), 127.5 (*t*Bu- $\text{C}_6\text{H}_4$ ), 127.1 (triazolium-*C*), 127.0 (Ph-*C*), 123.6 (Ph-*C*), 122.3 (Ph-*C*), 120.9 (*t*Bu- $\text{C}_6\text{H}_4$ ), 80.7 (quaternary *C*), 40.7 (N- $\text{CH}_3$ ), 35.3 ( $\text{C}(\text{CH}_3)_3$ ), 31.2 ( $\text{C}(\text{CH}_3)_3$ ). HRMS (ESI):  $m/z$  calcd. for  $\text{C}_{28}\text{H}_{28}\text{N}_5\text{O}$   $[\text{M}+\text{H}]^+$  450.2279, found 450.2288.

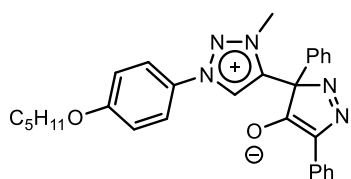

**3ad**

Yellow solid. 171. mg, 71%.  $^1\text{H}$  NMR (500 MHz,  $\text{CDCl}_3$ ):  $\delta$  8.90 (s, 1H, triazolium-*H*), 8.15–8.07 (m, 2H, Ph-*H*), 7.63–7.52 (m, 2H, pentoxy- $\text{C}_6\text{H}_4$ ), 7.35–7.30 (m, 2H, Ph-*H*), 7.28–7.19 (m, 5H, Ph-*H*), 7.01 (tt,  $J = 7.3, 1.3$  Hz, 1H, Ph-*H*), 6.92–6.85 (m, 2H, pentoxy- $\text{C}_6\text{H}_4$ ), 4.34 (s, 3H, N- $\text{CH}_3$ ), 3.90 (td,  $J = 6.6, 2.0$  Hz, 2H,  $\text{CH}_2\text{CH}_2\text{CH}_2\text{CH}_2\text{CH}_3$ ), 1.83–1.70 (m, 2H,  $\text{CH}_2\text{CH}_2\text{CH}_2\text{CH}_2\text{CH}_3$ ), 1.47–1.31 (m, 4H,  $\text{CH}_2\text{CH}_2\text{CH}_2\text{CH}_2\text{CH}_3$ ), 0.93 (t,  $J = 7.1$  Hz, 3H,  $\text{CH}_2\text{CH}_2\text{CH}_2\text{CH}_2\text{CH}_3$ ).  $^{13}\text{C}$  NMR (126 MHz,  $\text{CDCl}_3$ ):  $\delta$  188.7 ( $\text{CO}^-$ ), 161.8 (pentoxy- $\text{C}_6\text{H}_4$ ), 143.6 (triazolium-*C*), 135.1 (Ph-*C*), 134.9 (Ph-*C*), 130.7 ( $\text{NC}(\text{Ph})=\text{CO}^-$ ), 129.2 (Ph-*C*), 128.20 (Ph-*C*), 128.19 (Ph-*C*), 127.5 (pentoxy- $\text{C}_6\text{H}_4$ ), 127.2 (triazolium-*C*), 127.0 (Ph-*C*), 123.57 (Ph-*C*), 122.8 (pentoxy- $\text{C}_6\text{H}_4$ ), 122.2 (Ph-*C*), 115.8 (pentoxy- $\text{C}_6\text{H}_4$ ), 80.7 (quaternary *C*), 68.8 ( $\text{CH}_2\text{CH}_2\text{CH}_2\text{CH}_2\text{CH}_3$ ), 40.6 (N- $\text{CH}_3$ ), 28.8 ( $\text{CH}_2\text{CH}_2\text{CH}_2\text{CH}_2\text{CH}_3$ ), 28.2 ( $\text{CH}_2\text{CH}_2\text{CH}_2\text{CH}_2\text{CH}_3$ ), 22.5 ( $\text{CH}_2\text{CH}_2\text{CH}_2\text{CH}_2\text{CH}_3$ ), 14.1 ( $\text{CH}_2\text{CH}_2\text{CH}_2\text{CH}_2\text{CH}_3$ ). HRMS (ESI):  $m/z$  calcd. for  $\text{C}_{29}\text{H}_{30}\text{N}_5\text{O}_2$   $[\text{M}+\text{H}]^+$  480.2394, found 480.2392.

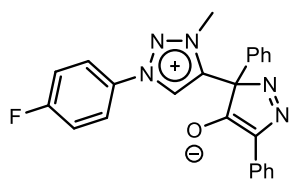

**3ae**

Yellow-orange solid. 155. mg, 75%.  $^1\text{H}$  NMR (500 MHz,  $\text{CDCl}_3$ )  $\delta$  9.12 (s, 1H, triazolium-*H*), 8.12–8.02 (m, 2H, Ph-*H*), 7.81–7.73 (m, 2H, F- $\text{C}_6\text{H}_4$ ), 7.40–7.33 (m, 2H, Ph-*H*), 7.31–7.24 (m, 5H, Ph-*H*), 7.20–7.13 (m, 2H, F- $\text{C}_6\text{H}_4$ ), 7.06 (tt,  $J = 7.4, 1.3$  Hz, 1H), 4.36 (s, 3H, N- $\text{CH}_3$ ).  $^{13}\text{C}$  NMR (126 MHz,  $\text{CDCl}_3$ )  $\delta$  189.1 ( $\text{CO}^-$ ), 164.3 (d,  $J = 255.0$  Hz, F- $\text{C}_6\text{H}_4$ ), 143.7 (triazolium-C), 134.4, 134.3, 131.6, 130.9 (d,  $J = 3.4$  Hz, F- $\text{C}_6\text{H}_4$ ), 129.4, 128.6, 128.3, 128.1 (triazolium-C), 127.1 (Ph-C), 124.4 (Ph-C), 123.8 (d,  $J = 9.2$  Hz, F- $\text{C}_6\text{H}_4$ ), 122.6 (Ph-C), 117.7 (d,  $J = 23.8$  Hz, F- $\text{C}_6\text{H}_4$ ), 79.6 (quaternary C), 40.9 (N- $\text{CH}_3$ ).  $^{19}\text{F}$  NMR (470 MHz,  $\text{CDCl}_3$ )  $\delta$  -105.9 (tt,  $J = 8.0, 4.4$  Hz). HRMS (ESI):  $m/z$  calcd. for  $\text{C}_{24}\text{H}_{19}\text{N}_5\text{OF}$   $[\text{M}+\text{H}]^+$  412.1568, found 412.1563.

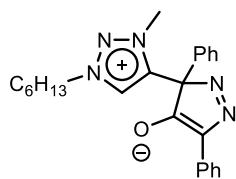

**3af**

Yellow solid. 132. mg, 66%.  $^1\text{H}$  NMR (500 MHz,  $\text{CDCl}_3$ )  $\delta$  8.78 (s, 1H, triazolium-*H*), 8.19–8.06 (m, 2H, Ph-*H*), 7.32–7.25 (m, 2H, Ph-*H*), 7.23–7.21 (m, 5H, Ph-*H*), 7.04 (tt,  $J = 7.3, 1.3$  Hz, 1H, Ph-*H*), 4.48–4.34 (m, 2H,  $\text{CH}_2\text{CH}_2\text{CH}_2\text{CH}_2\text{CH}_2\text{CH}_3$ ), 4.21 (s, 3H, N- $\text{CH}_3$ ), 1.80–1.69 (m, 2H,  $\text{CH}_2\text{CH}_2\text{CH}_2\text{CH}_2\text{CH}_2\text{CH}_3$ ), 1.26–1.14 (m, 6H,  $\text{CH}_2\text{CH}_2\text{CH}_2\text{CH}_2\text{CH}_2\text{CH}_3$ ), 0.85–0.78 (m, 3H,  $\text{CH}_2\text{CH}_2\text{CH}_2\text{CH}_2\text{CH}_2\text{CH}_3$ ).  $^{13}\text{C}$  NMR (126 MHz,  $\text{CDCl}_3$ )  $\delta$  189.1 ( $\text{CO}^-$ ), 142.7 (triazolium-C), 134.92 (Ph-C), 134.91 (Ph-C), 130.8 ( $\text{NC}(\text{Ph})=\text{CO}^-$ ), 129.7 (triazolium-C), 129.2 (Ph-C), 128.3 (Ph-C), 128.2 (Ph-C), 126.9 (Ph-C), 123.8 (Ph-C), 122.3 (Ph-C), 80.5 (quaternary C), 54.2 ( $\text{CH}_2\text{CH}_2\text{CH}_2\text{CH}_2\text{CH}_2\text{CH}_3$ ), 40.3 (N- $\text{CH}_3$ ), 30.9 ( $\text{CH}_2\text{CH}_2\text{CH}_2\text{CH}_2\text{CH}_2\text{CH}_3$ ), 29.3 ( $\text{CH}_2\text{CH}_2\text{CH}_2\text{CH}_2\text{CH}_2\text{CH}_3$ ), 25.9 ( $\text{CH}_2\text{CH}_2\text{CH}_2\text{CH}_2\text{CH}_2\text{CH}_3$ ), 22.3 ( $\text{CH}_2\text{CH}_2\text{CH}_2\text{CH}_2\text{CH}_2\text{CH}_3$ ), 13.9 ( $\text{CH}_2\text{CH}_2\text{CH}_2\text{CH}_2\text{CH}_2\text{CH}_3$ ). HRMS (ESI):  $m/z$  calcd. for  $\text{C}_{24}\text{H}_{27}\text{N}_5\text{O}$   $[\text{M}+\text{H}]^+$  402.2288, found 402.2296.

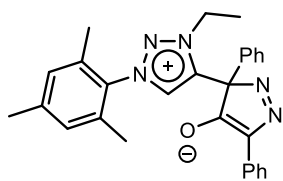

**3ag**

Yellow solid. 154. mg, 69%.  $^1\text{H}$  NMR (500 MHz,  $\text{CDCl}_3$ ):  $\delta$  8.36 (s, 1H, triazolium-*H*), 8.26–8.19 (m, 2H, Ph-*H*), 7.42–7.32 (m, 4H, Ph-*H*), 7.34–7.26 (m, 3H, Ph-*H*), 7.08–7.00 (m, 3H, overlapping, Ph-*H* and Mes-*H*), 4.98 (dq,  $J = 14.4, 7.2$  Hz, 1H,  $\text{CH}_2\text{CH}_3$ ), 4.89 (dq,  $J = 14.4, 7.2$  Hz, 1H,  $\text{CH}_2\text{CH}_3$ ), 2.37 (s, 3H, Mes- $\text{CH}_3$ ), 2.02 (s, 6H, Mes- $\text{CH}_3$ ), 1.45 (t,  $J = 7.3$  Hz, 3H,  $\text{CH}_2\text{CH}_3$ ).  $^{13}\text{C}$  NMR (126 MHz,  $\text{CDCl}_3$ ):  $\delta$  188.6 ( $\text{CO}^-$ ), 144.1 (triazolium-*C*), 142.9 (Mes-*C*), 135.9 (Ph-*C*), 135.1 (Ph-*C*), 134.1 (Mes-*C*), 131.4 (Mes-*C*), 130.9 ( $\text{NC(Ph)=CO}^-$ ), 130.7 (triazolium-*C*), 130.1 (Mes-*C*), 129.4 (Ph-*C*), 128.3 (Ph-*C*), 128.3 (Ph-*C*), 126.4 (Ph-*C*), 123.6 (Ph-*C*), 122.4 (Ph-*C*), 79.8 (quaternary *C*), 49.9 ( $\text{CH}_2\text{CH}_3$ ), 21.4 (Mes- $\text{CH}_3$ ), 17.4 (Mes- $\text{CH}_3$ ), 14.3 ( $\text{CH}_2\text{CH}_3$ ). HRMS (ESI):  $m/z$  calcd. for  $\text{C}_{28}\text{H}_{28}\text{N}_5\text{O}$   $[\text{M}+\text{H}]^+$  450.2292, found 450.2288.

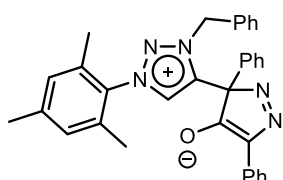

**3ah**

Yellow solid. 190. mg, 74%.  $^1\text{H}$  NMR (500 MHz,  $\text{CDCl}_3$ ):  $\delta$  8.44 (s, 1H, triazolium-*H*), 8.29–8.21 (m, 2H, Ph-*H*), 7.35–7.24 (m, 8H, Ph-*H*), 7.24–7.17 (m, 2H, Ph-*H*), 7.10–7.01 (m, 3H, Ph-*H*), 7.02 (q,  $J = 0.7$  Hz, 2H, Mes-*H*), 6.16 (d,  $J = 14.5$  Hz, 1H,  $\text{CH}_2$ ), 6.08 (d,  $J = 14.5$  Hz, 1H,  $\text{CH}_2$ ), 2.35 (s, 3H, Mes- $\text{CH}_3$ ), 1.93 (s, 6H, Mes- $\text{CH}_3$ ).  $^{13}\text{C}$  NMR (126 MHz,  $\text{CDCl}_3$ ):  $\delta$  188.7 ( $\text{CO}^-$ ), 144.2 (triazolium-*C*), 142.9 (Mes-*C*), 136.0 (Ph-*C*), 135.1 (Ph-*C*), 134.0 (Mes-*C*), 131.7 (Ph-*C*), 131.4 (Mes-*C*), 130.9 ( $\text{NC(Ph)=CO}^-$ ), 130.7 (triazolium-*C*), 130.1 (Mes-*C*), 129.47 (Ph-*C*), 129.45 (Ph-*C*), 129.40 (Ph-*C*), 129.0 (Ph-*C*), 128.30, 128.28, 126.5 (Ph-*C*), 123.7 (Ph-*C*), 122.4 (Ph-*C*), 79.9 (quaternary *C*), 57.7 ( $\text{CH}_2$ ), 21.3 (Mes- $\text{CH}_3$ ), 17.3 (Mes- $\text{CH}_3$ ). HRMS (ESI):  $m/z$  calcd. for  $\text{C}_{33}\text{H}_{30}\text{N}_5\text{O}$   $[\text{M}+\text{H}]^+$  512.2445, found 512.2439.

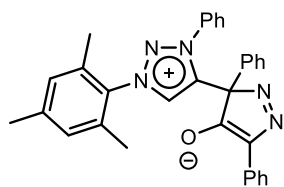

3ai

Yellow solid. 206. mg, 83%.  $^1\text{H}$  NMR (500 MHz,  $\text{CDCl}_3$ )  $\delta$  8.19 (s, 1H, triazolium-*H*), 8.16 (dq,  $J = 8.6, 1.6$  Hz, 2H, Ph-*H*), 7.89–7.83 (m, 2H, Ph-*H*), 7.45–7.40 (m, 1H, Ph-*H*), 7.37–7.31 (m, 2H, Ph-*H*), 7.32–7.24 (m, 4H, Ph-*H*), 7.12–7.04 (m, 5H, Ph-*H* and Mes-*H*), 7.02 (tt,  $J = 7.3, 1.3$  Hz, 1H, Ph-*H*), 2.37 (s, 3H, Mes- $\text{CH}_3$ ), 2.13 (s, 6H, Mes- $\text{CH}_3$ ).  $^{13}\text{C}$  NMR (126 MHz,  $\text{CDCl}_3$ )  $\delta$  188.7 ( $\text{CO}^-$ ), 145.1 (triazolium-C), 143.1 (Mes-C), 135.3, 134.9, 134.3, 134.1 (Mes-C), 132.0 (Ph-C), 131.4, 131.31, 131.28, 130.2 (Mes-C), 129.1 (Ph-C), 128.6 (Ph-C), 128.2, 127.9, 126.8 (Ph-C), 126.4 (Ph-C), 123.7 (Ph-C), 122.5 (Ph-C), 77.4 (quaternary C), 21.4 (Mes- $\text{CH}_3$ ), 17.5 (Mes- $\text{CH}_3$ ). HRMS (ESI):  $m/z$  calcd. for  $\text{C}_{32}\text{H}_{27}\text{N}_5\text{O}$   $[\text{M}+\text{H}]^+$  498.2289, found 498.2288.

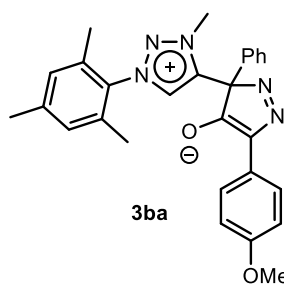

3ba

Yellow-orange solid. 175. mg, 75%.  $^1\text{H}$  NMR (500 MHz,  $\text{CDCl}_3$ )  $\delta$  8.33 (s, 1H, triazolium-*H*), 8.17–8.10 (m, 2H, MeO- $\text{C}_6\text{H}_4$ -), 7.44–7.37 (m, 2H, Ph-*H*), 7.37–7.32 (m, 2H, Ph-*H*), 7.33–7.26 (m, 1H, Ph-*H*), 7.03 (s, 2H, Mes-*H*), 6.90–6.85 (m, 2H, MeO- $\text{C}_6\text{H}_4$ -), 4.42 (s, 3H, N- $\text{CH}_3$ ), 3.78 (s, 3H, O- $\text{CH}_3$ ), 2.36 (s, 3H, Mes- $\text{CH}_3$ ), 2.01 (s, 6H, Mes- $\text{CH}_3$ ).  $^{13}\text{C}$  NMR (126 MHz,  $\text{CDCl}_3$ )  $\delta$  188.0 ( $\text{CO}^-$ ), 156.5 (MeO- $\text{C}_6\text{H}_4$ -), 144.6 (triazolium-C), 142.9 (Mes-C), 135.4 (Ph-C), 134.1 (Mes-C), 131.2 (Mes-C), 131.1 (NC(Ph)= $\text{CO}^-$ ), 131.0 (triazolium-C), 130.1 (Mes-C), 129.4 (Ph-C), 128.3 (Ph-C), 128.2 (MeO- $\text{C}_6\text{H}_4$ -), 126.6 (Ph-C), 123.6 (MeO- $\text{C}_6\text{H}_4$ -), 113.8 (MeO- $\text{C}_6\text{H}_4$ -), 79.6 (quaternary C), 55.4 (O- $\text{CH}_3$ ), 40.6 (N- $\text{CH}_3$ ), 21.3 (Mes- $\text{CH}_3$ ), 17.4 (Mes- $\text{CH}_3$ ). HRMS (ESI):  $m/z$  calcd. for  $\text{C}_{28}\text{H}_{28}\text{N}_5\text{O}_2$   $[\text{M}+\text{H}]^+$  466.2238, found 466.2235.

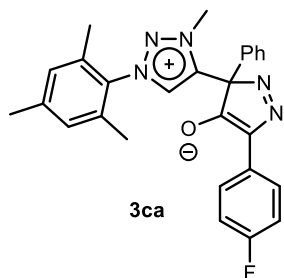

3ca

Yellow-orange solid. 180. mg, 79%.  $^1\text{H}$  NMR (500 MHz,  $\text{CDCl}_3$ ):  $\delta$  8.28 (s, 1H, triazolium-*H*), 8.17–8.08 (m, 2H, F- $\text{C}_6\text{H}_4$ -), 7.52–7.47 (m, 2H, Ph-*H*), 7.42–7.36 (m, 2H, Ph-*H*), 7.36–7.31 (m, 1H, Ph-*H*), 7.05–7.02 (m, 2H, Mes-*H*), 7.02–6.97 (m, 2H, F- $\text{C}_6\text{H}_4$ -), 4.37 (s, 3H, N- $\text{CH}_3$ ), 2.36 (s, 3H, Mes- $\text{CH}_3$ ), 2.05 (s, 6H, Mes- $\text{CH}_3$ ).  $^{13}\text{C}$  NMR (126 MHz,  $\text{CDCl}_3$ ):  $\delta$  189.6 ( $\text{CO}^-$ ), 160.9 (d,  $J = 243.4$  Hz, F- $\text{C}_6\text{H}_4$ -), 143.8 (triazolium-C), 143.0 (Mes-C), 134.4 (Ph-C), 134.2 (Mes-C), 132.6 ( $\text{NC(Ph)=CO}^-$ ), 131.6 (triazolium-C), 131.1 (Mes-C), 130.1 (Mes-C), 129.6 (Ph-C), 129.5 (d,  $J = 3.0$  Hz, F- $\text{C}_6\text{H}_4$ -), 129.0 (Ph-C), 126.8 (Ph-C), 124.7 (d,  $J = 7.5$  Hz, F- $\text{C}_6\text{H}_4$ -), 115.1 (d,  $J = 21.2$  Hz, F- $\text{C}_6\text{H}_4$ -), 76.4 (quaternary C), 40.9 (N- $\text{CH}_3$ ), 21.3 (Mes- $\text{CH}_3$ ), 17.6 (Mes- $\text{CH}_3$ ).  $^{19}\text{F}$  NMR (564 MHz,  $\text{CDCl}_3$ ):  $\delta$  -117.5.

HRMS (ESI):  $m/z$  calcd. for  $\text{C}_{27}\text{H}_{25}\text{N}_5\text{OF}$   $[\text{M}+\text{H}]^+$  454.2038, found 454.2043.

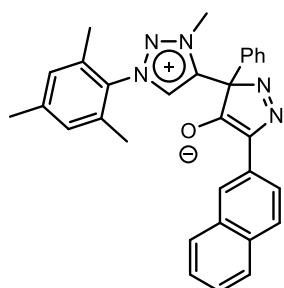

3da

Yellow-orange solid. 209. mg, 86%.  $^1\text{H}$  NMR (500 MHz,  $\text{CDCl}_3$ )  $\delta$  8.63 (s, 1H, nap-*H*), 8.45 (dd,  $J = 8.7, 1.7$  Hz, 1H), 8.38 (s, 1H, triazolium-*H*), 7.77 (dd,  $J = 8.2, 3.3$  Hz, 2H), 7.71 (dd,  $J = 8.2, 1.2$  Hz, 1H, nap-*H*), 7.45 (dd,  $J = 7.1, 1.5$  Hz, 2H), 7.41–7.23 (m, 5H), 7.01 (s, 2H, Mes-*H*), 4.44 (s, 3H, N- $\text{CH}_3$ ), 2.34 (s, 3H, Mes- $\text{CH}_3$ ), 2.01 (s, 6H, Mes- $\text{CH}_3$ ).  $^{13}\text{C}$  NMR (126 MHz,  $\text{CDCl}_3$ )  $\delta$  189.0 ( $\text{CO}^-$ ),

144.4 (triazolium-C), 143.0 (Mes-C), 135.2, 134.3, 134.0 (Mes-C), 132.5 (nap-C), 131.4, 131.2, 131.2, 131.1, 130.1 (Mes-C), 129.4, 128.5, 127.9 (nap-C), 127.6, 126.6, 125.5, 123.8 (nap-C), 122.8, 119.0 (nap-C), 79.8 (quaternary C), 40.7 (N- $\text{CH}_3$ ), 21.3 (Mes- $\text{CH}_3$ ), 17.4 (Mes- $\text{CH}_3$ ). HRMS (ESI):  $m/z$  calcd. for  $\text{C}_{31}\text{H}_{28}\text{N}_5\text{O}$   $[\text{M}+\text{H}]^+$  486.2288, found 486.2286.



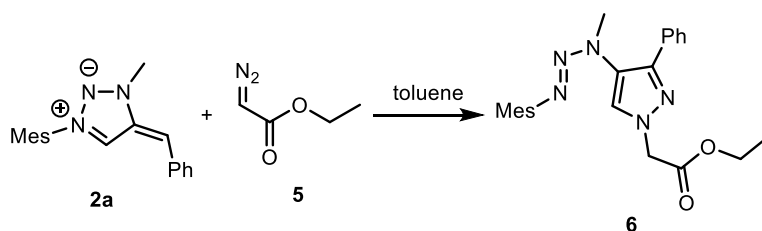

To a stirring solution of **2a** (140. mg, 0.48 mmol) in toluene (2 mL) was added **5** (365. mg, 15 wt% in toluene, 0.48 mmol). The reaction mixture was stirred for 24 h at room temperature. The mixture was passed through a short pad of alumina eluted with toluene. The filtrate was evaporated under vacuum to afford a light yellow oily residue. Yield: 104. mg, 53%. <sup>1</sup>H NMR (500 MHz, C<sub>6</sub>D<sub>6</sub>) δ 8.06–7.91 (m, 2H, Ph-*H*), 7.23–7.15 (m, 2H, Ph-*H*), 7.09 (s, 1H, pyrazole-*H*), 7.08 (ddt, *J* = 8.0, 6.9, 1.3 Hz, 1H, Ph-*H*), 6.91–6.80 (br, 2H, Mes-*H*), 4.31 (s, 2H, N-CH<sub>2</sub>-COOCH<sub>2</sub>CH<sub>3</sub>), 3.78 (q, *J* = 7.1 Hz, 2H, COOCH<sub>2</sub>CH<sub>3</sub>), 3.23 (s, 3H, N-CH<sub>3</sub>), 2.39 (s, 6H, Mes-CH<sub>3</sub>), 2.18 (s, 3H, Mes-CH<sub>3</sub>), 0.81 (t, *J* = 7.1 Hz, 3H, COOCH<sub>2</sub>CH<sub>3</sub>). <sup>13</sup>C NMR (126 MHz, C<sub>6</sub>D<sub>6</sub>) δ 167.3 (COOCH<sub>2</sub>CH<sub>3</sub>), 146.2 (Mes-C), 145.4, 134.7 (Mes-C), 133.2, 130.5 (Mes-C), 129.9 (Mes-C), 128.8 (Ph-C), 128.2, 127.72 (Ph-C), 127.71 (pyrazole-C), 61.5 (COOCH<sub>2</sub>CH<sub>3</sub>), 53.6 (N-CH<sub>2</sub>-COOCH<sub>2</sub>CH<sub>3</sub>), 37.8 (N-CH<sub>3</sub>), 21.0 (Mes-CH<sub>3</sub>), 19.4 (Mes-CH<sub>3</sub>), 13.9 (COOCH<sub>2</sub>CH<sub>3</sub>). HRMS (ESI): *m/z* calcd. for C<sub>23</sub>H<sub>28</sub>N<sub>5</sub>O<sub>2</sub> [M+H]<sup>+</sup> 406.2238, found 406.2230.

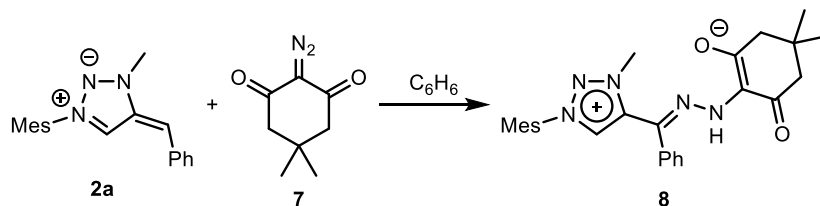

To a stirring solution of **2a** (146. mg, 0.50 mmol) in benzene (2 mL) was added **7** (83. mg, 0.50 mmol) in benzene (2 mL). The reaction mixture instantaneously turned from dark purple to red. The reaction mixture was stirred for 30 min at room temperature and an orange precipitate gradually formed. Diethyl

ether (10 mL) was added to the mixture. The solid was collected by filtration, washed with diethyl ether (3 × 5 mL), and dried under vacuum. Orange solid. Yield: 209. mg, 91%. Crystals suitable for X-ray crystallography were obtained by top-layering a benzene solution of **2a** with a benzene solution of **7** and letting the reagents diffuse undisturbed at room temperature. <sup>1</sup>H NMR (500 MHz, CD<sub>3</sub>OD) δ 7.64 (d, *J* = 7.4 Hz, 2H, Ph-*H*), 7.59 (t, *J* = 7.6 Hz, 2H, Ph-*H*), 7.50 (t, *J* = 7.4 Hz, 1H, Ph-*H*), 7.12 (s, 2H, Mes-*H*), 4.52 (s, 3H, N-CH<sub>3</sub>), 2.36 (s, 3H, Mes-CH<sub>3</sub>), 2.28 (s, 4H, CH<sub>2</sub>), 2.07 (s, 6H, Mes-CH<sub>3</sub>), 1.09 (s, 6H, C(CH<sub>3</sub>)<sub>2</sub>). <sup>13</sup>C NMR (126 MHz, CD<sub>3</sub>OD) δ 189.3 (CO), 143.9 (triazolium-C), 143.6 (Mes-C), 135.8 (Mes-C), 133.0 (Mes-C), 131.5, 131.1, 130.7 (Mes-C), 130.3, 129.3, 125.8, 119.2, 50.6 (CH<sub>2</sub>), 42.5 (N-CH<sub>3</sub>), 32.6 (C(CH<sub>3</sub>)<sub>2</sub>), 28.9 (C(CH<sub>3</sub>)<sub>2</sub>), 21.2 (Mes-CH<sub>3</sub>), 17.0 (Mes-CH<sub>3</sub>). HRMS (ESI): *m/z* calcd. for C<sub>27</sub>H<sub>32</sub>N<sub>5</sub>O<sub>2</sub> [M+H]<sup>+</sup> 458.2549, found 458.2551.

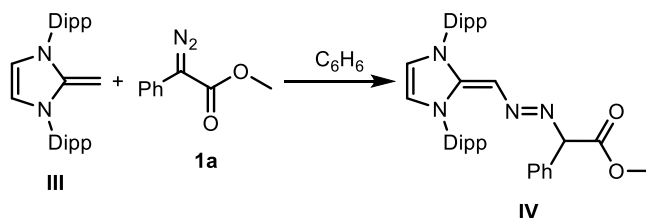

To a stirring solution of **III** (183. mg, 0.46 mmol) in benzene (2 mL) was added **1a** (80. mg, 0.46 mmol) in benzene (2 mL). The reaction mixture was stirred for 3 hours at room temperature. All volatiles were then removed under vacuum. The residue was stirred with diethyl ether (5 mL) for 30 min at room temperature to afford a yellow suspension. The yellow solid of **IV** was collected by filtration, washed with cold diethyl ether (−35 °C, 3 × 1 mL) and *n*-pentane (3 × 1 mL), and dried under vacuum. Yield: 148. mg, 56%. Crystals suitable for X-ray crystallography were obtained by cooling a concentrated diethyl ether solution to −35 °C. <sup>1</sup>H NMR (500 MHz, C<sub>6</sub>D<sub>6</sub>) δ 7.62–7.51 (m, 2H), 7.33 (t, *J* = 7.7 Hz, 1H, Ph-*H*), 7.23–7.17 (m, 2H), 7.12–7.09 (m, *J* = 7.6 Hz, 3H), 7.05–6.98 (m, 3H), 6.71 (s, 1H, im=CH-N), 5.92 (d, *J* = 2.3 Hz, 1H, im-*H*), 5.89 (d, *J* = 2.3 Hz, 1H, im-*H*), 4.54 (s, 1H, Ph-CH(N)-COOCH<sub>3</sub>), 3.22

(s, 3H, COOCH<sub>3</sub>), 3.10 (hept, *J* = 6.9 Hz, 1H, CH(CH<sub>3</sub>)<sub>2</sub>), 2.96–2.87 (m, 2H, CH(CH<sub>3</sub>)<sub>2</sub>), 2.82 (hept, *J* = 6.9 Hz, 1H, CH(CH<sub>3</sub>)<sub>2</sub>), 1.41 (d, *J* = 6.9 Hz, 3H, CH(CH<sub>3</sub>)<sub>2</sub>), 1.24 (d, *J* = 6.9 Hz, 3H, CH(CH<sub>3</sub>)<sub>2</sub>), 1.14 (d, *J* = 6.9 Hz, 3H, CH(CH<sub>3</sub>)<sub>2</sub>), 1.11 (d, *J* = 6.9 Hz, 3H, CH(CH<sub>3</sub>)<sub>2</sub>), 1.08 (d, *J* = 6.9 Hz, 3H, CH(CH<sub>3</sub>)<sub>2</sub>), 1.03 (d, *J* = 6.9 Hz, 3H, CH(CH<sub>3</sub>)<sub>2</sub>), 1.01 (d, *J* = 6.9 Hz, 3H, CH(CH<sub>3</sub>)<sub>2</sub>), 0.97 (d, *J* = 6.9 Hz, 3H, CH(CH<sub>3</sub>)<sub>2</sub>). <sup>13</sup>C NMR (126 MHz, C<sub>6</sub>D<sub>6</sub>) δ 172.4 (COOCH<sub>3</sub>), 149.1 (im-C<sup>2</sup>), 147.4 (Dipp-C), 147.3 (Dipp-C), 146.3 (Dipp-C), 145.9 (Dipp-C), 140.5 (Ph-C), 136.5 (Dipp-C), 132.2 (Dipp-C), 130.5 (Ph-C), 129.4 (Ph-C), 129.2 (Ph-C), 128.1 (Dipp-C), 127.1 (Dipp-C), 124.9 (Dipp-C), 124.8 (Dipp-C), 124.11 (Dipp-C), 124.09 (Dipp-C), 119.0 (im-C), 116.6 (im-C), 102.0 (im=CH-N), 81.6 (Ph-CH(N)-COOCH<sub>3</sub>), 50.9 (COOCH<sub>3</sub>), 29.3 (CH(CH<sub>3</sub>)<sub>2</sub>), 29.1 (CH(CH<sub>3</sub>)<sub>2</sub>), 29.0 (CH(CH<sub>3</sub>)<sub>2</sub>), 28.9 (CH(CH<sub>3</sub>)<sub>2</sub>), 24.3 (CH(CH<sub>3</sub>)<sub>2</sub>), 24.22 (CH(CH<sub>3</sub>)<sub>2</sub>), 24.18 (CH(CH<sub>3</sub>)<sub>2</sub>), 23.6 (CH(CH<sub>3</sub>)<sub>2</sub>), 23.5 (CH(CH<sub>3</sub>)<sub>2</sub>), 23.2 (CH(CH<sub>3</sub>)<sub>2</sub>), 23.0 (CH(CH<sub>3</sub>)<sub>2</sub>). HRMS (ESI): *m/z* calcd for C<sub>37</sub>H<sub>47</sub>N<sub>4</sub>O<sub>2</sub> [M+H]<sup>+</sup> 579.3694, found 579.3694.

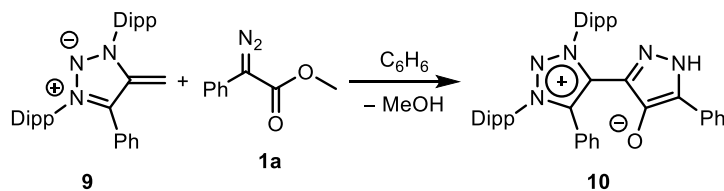

To a stirring solution of **9** (240. mg, 0.50 mmol) in C<sub>6</sub>H<sub>6</sub> (1 mL) was added **1a** (88. mg, 0.50 mmol) in C<sub>6</sub>H<sub>6</sub> (1 mL). The reaction mixture turned from dark purple to brown. The reaction mixture was stirred for 30 min at room temperature and a brown precipitate gradually formed. Diethyl ether (5 mL) was added to the mixture. The brown solid of **10** was collected by filtration, washed with diethyl ether (3 × 1 mL) and *n*-pentane (3 × 5 mL), and dried under vacuum. Yield: 274. mg, 88%. Crystals suitable for X-ray crystallography were obtained by letting a concentrated THF/toluene solution stand at room temperature. <sup>1</sup>H NMR (500 MHz, CD<sub>3</sub>OD) δ 7.83–7.76 (m, 2H, Ph-*H*), 7.69 (t, *J* = 7.9 Hz, 1H, Dipp-*H*),

7.57 (t,  $J = 7.8$  Hz, 1H, Dipp-*H*), 7.47 (d,  $J = 7.8$  Hz, 2H, Dipp-*H*), 7.41–7.34 (m, 5H, Dipp-*H* and Ph-*H*), 7.31–7.27 (m, 2H, Ph-*H*), 7.27–7.22 (m, 2H, Ph-*H*), 7.10–7.02 (m, 1H, Ph-*H*), 2.78–2.58 (m, 4H, CH(CH<sub>3</sub>)<sub>2</sub>), 1.24 (d,  $J = 6.7$  Hz, 6H, CH(CH<sub>3</sub>)<sub>2</sub>), 1.20 (d,  $J = 6.9$  Hz, 6H), 1.19 (d,  $J = 6.9$  Hz, 6H), 1.01 (d,  $J = 6.7$  Hz, 6H, CH(CH<sub>3</sub>)<sub>2</sub>). <sup>13</sup>C NMR (126 MHz, CD<sub>3</sub>OD)  $\delta$  153.3, 147.2 (Dipp-C), 147.1 (Dipp-C), 143.3, 140.4, 134.2 (Dipp-C), 133.2 (Dipp-C), 132.8, 132.10, 132.09, 131.3, 130.7, 129.9, 129.2, 126.3 (Dipp-C), 126.1 (Ph-C), 125.5 (Dipp-C), 125.0, 124.9 (Ph-C), 30.5 (CH(CH<sub>3</sub>)<sub>2</sub>), 30.4 (CH(CH<sub>3</sub>)<sub>2</sub>), 26.1 (CH(CH<sub>3</sub>)<sub>2</sub>), 25.9 (CH(CH<sub>3</sub>)<sub>2</sub>), 23.4 (CH(CH<sub>3</sub>)<sub>2</sub>), 22.8 (CH(CH<sub>3</sub>)<sub>2</sub>). HRMS (ESI):  $m/z$  calcd. for C<sub>41</sub>H<sub>46</sub>N<sub>5</sub>O [M+H]<sup>+</sup> 624.3697, found 624.3697.

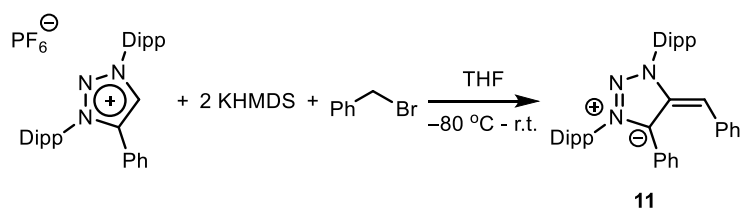

To a solid mixture of 1,3-bis(2,6-diisopropylphenyl)-5-phenyl-1,2,3-triazolium hexafluorophosphate (612. mg, 1.0 mmol) and KHMDS (399. mg, 2.0 mmol) was added THF (5 mL). The mixture was stirred for 1 h at room temperature and then cooled to  $-80$  °C, followed by the addition of benzyl bromide (119.  $\mu$ L, 1.00 mmol). The mixture was slowly warmed to room temperature and stirred for 3 h. All volatiles were removed under reduced pressure. The residue was extracted with diethyl ether and filtered through Celite. The filtrate was concentrated to dryness under vacuum to afford a dark green crystalline solid. The solid of **11** was washed with cold diethyl ether ( $-35$  °C,  $3 \times 1$  mL) and *n*-pentane ( $3 \times 1$  mL), and dried under vacuum (479. mg, 86%). Crystals suitable for X-ray crystallography were obtained by cooling a saturated diethyl ether solution to  $-35$  °C. <sup>1</sup>H NMR (500 MHz, C<sub>6</sub>D<sub>6</sub>)  $\delta$  7.31 (dd,  $J = 8.5, 6.9$  Hz, 1H), 7.23 (d,  $J = 7.3$  Hz, 2H), 7.15 (t,  $J = 7.7$  Hz, 1H), 7.01 (dd,  $J = 7.6, 2.3$  Hz, 2H), 6.98–6.90 (m, 4H), 6.79 (dd,  $J = 5.1, 2.0$  Hz, 3H), 6.71–6.64 (m, 3H), 4.59 (s, 1H, CH), 3.38 (hept,  $J =$

6.8 Hz, 2H,  $CH(CH_3)_2$ ), 3.02 (hept,  $J = 6.8$  Hz, 2H,  $CH(CH_3)_2$ ), 1.38 (d,  $J = 6.8$  Hz, 7H,  $CH(CH_3)_2$ ), 1.25 (d,  $J = 6.9$  Hz, 6H,  $CH(CH_3)_2$ ), 1.18 (d,  $J = 6.8$  Hz, 6H,  $CH(CH_3)_2$ ), 0.85 (d,  $J = 6.8$  Hz, 6H,  $CH(CH_3)_2$ ).  $^{13}C$  NMR (126 MHz,  $C_6D_6$ )  $\delta$  148.3 (Dipp-C), 146.2 (Dipp-C), 142.0, 140.1, 132.8 (Dipp-C), 132.4 (Dipp-C), 131.5, 131.0, 127.8, 127.61, 127.59, 127.3, 126.8, 125.0, 124.49, 124.47, 121.8, 118.4, 68.6 (CH), 29.4 ( $CH(CH_3)_2$ ), 29.3 ( $CH(CH_3)_2$ ), 25.9 ( $CH(CH_3)_2$ ), 24.5 ( $CH(CH_3)_2$ ), 23.7 ( $CH(CH_3)_2$ ), 22.6 ( $CH(CH_3)_2$ ). Anal. Calcd. for  $C_{39}H_{45}N_3$ : C, 84.28; H, 8.16; N, 7.56. Found: C, 83.86; H, 8.45; N, 7.83.

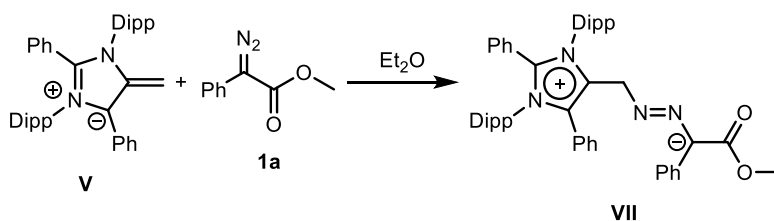

To a stirring solution of **V** (306. mg, 0.55 mmol) in diethyl ether (1 mL) was added **1a** (97. mg, 0.55 mmol) in diethyl ether (1 mL). The reaction mixture turned from green to red orange. The reaction mixture was stirred for 3 h at room temperature and an orange brown precipitate gradually formed. The solid was collected by filtration, washed with cold diethyl ether ( $-35$  °C, 1 mL) and *n*-pentane ( $3 \times 1$  mL). The solid was then dissolved in 10 mL of toluene, filtered. The filtrate was concentrated to  $\sim 1$  mL and cooled to  $-35$  °C to afford light yellow crystals of **VII** that were suitable for X-ray crystallography. The supernatant was decanted off and the crystals were washed with cold diethyl ether ( $-35$  °C, 1 mL) and *n*-pentane ( $3 \times 1$  mL) and dried under vacuum (256. mg, 63%).  $^1H$  NMR (500 MHz,  $C_6D_6$ )  $\delta$  8.47–8.30 (m, 2H, Ph-*H*), 7.83–7.73 (m, 2H, Ph-*H*), 7.55–7.37 (m, 2H, Ph-*H*), 7.08–7.05 (m, 2H, Dipp-*H*), 6.97 (d,  $J = 7.8$  Hz, 2H, Dipp-*H*), 6.95–6.92 (m, 2H), 6.90–6.84 (m, 3H), 6.59–6.55 (m, 1H), 6.55–6.50 (m, 2H), 4.96 (s, 1H, im- $CH_2$ -N), 4.94 (s, 1H, im- $CH_2$ -N), 3.84 (s, 3H,  $COOCH_3$ ), 3.16–3.11 (m, 2H,  $CH(CH_3)_2$ ), 3.05 (hept,  $J = 6.7$  Hz, 2H,  $CH(CH_3)_2$ ), 1.13 (d,  $J = 6.6$  Hz, 6H,  $CH(CH_3)_2$ ), 0.95–0.92 (m, 6H,  $CH(CH_3)_2$ ), 0.84 (d,  $J = 6.6$  Hz, 6H,  $CH(CH_3)_2$ ), 0.72–0.70 (m, 6H,  $CH(CH_3)_2$ ).  $^{13}C$  NMR (126

MHz, C<sub>6</sub>D<sub>6</sub>)  $\delta$  167.3 (COOCH<sub>3</sub>), 147.1 (Dipp-C), 147.0 (Dipp-C), 146.34 (Dipp-C), 146.31 (Dipp-C), 146.29 (Dipp-C), 143.2, 139.8, 139.3, 139.2, 134.1, 131.8, 131.7, 131.6 (Ph-C), 131.2, 130.9 (Ph-C), 130.7, 130.4, 129.6, 129.2, 128.7, 128.4, 126.9 (Ph-C), 126.5, 125.64, 125.61, 123.18, 123.17, 117.1, 54.3 (im-CH<sub>2</sub>-N), 49.5 (COOCH<sub>3</sub>), 28.81 (CH(CH<sub>3</sub>)<sub>2</sub>), 28.76 (CH(CH<sub>3</sub>)<sub>2</sub>), 24.8 (CH(CH<sub>3</sub>)<sub>2</sub>), 24.5 (CH(CH<sub>3</sub>)<sub>2</sub>), 24.0 (CH(CH<sub>3</sub>)<sub>2</sub>), 23.6 (CH(CH<sub>3</sub>)<sub>2</sub>). HRMS (ESI):  $m/z$  calcd. for C<sub>49</sub>H<sub>55</sub>N<sub>4</sub>O<sub>2</sub> [M+H]<sup>+</sup> 731.4320, found 731.4308.

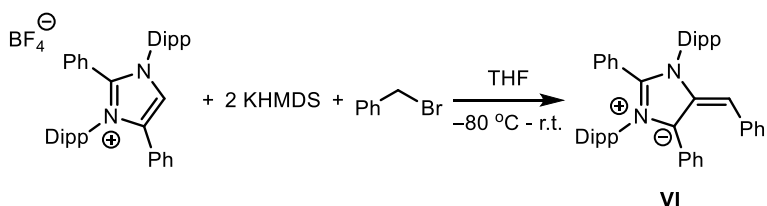

To a solid mixture of 1,3-bis(2,6-diisopropylphenyl)-2,4-diphenyl-imidazolium tetrafluoroborate (629. mg, 1.0 mmol) and KHMDS (399. mg, 2.0 mmol) was added THF (5 mL). The mixture was stirred for 1 h at room temperature and then cooled to  $-80$  °C, followed by the addition of benzyl bromide (119  $\mu$ L, 1.0 mmol). The mixture was slowly warmed to room temperature and stirred for 3 h. All volatiles were removed under reduced pressure. The residue was extracted with diethyl ether and filtered through Celite. The filtrate was concentrated to dryness under vacuum to afford a dark green crystalline solid. The solid of **VI** was washed with cold diethyl ether ( $-35$  °C,  $3 \times 1$  mL) and *n*-pentane ( $3 \times 1$  mL), and dried under vacuum (515. mg, 82%). <sup>1</sup>H NMR (600 MHz, C<sub>6</sub>D<sub>6</sub>)  $\delta$  7.24–7.17 (m, 2H), 7.12 (d,  $J = 7.7$  Hz, 2H, Dipp-*H*), 7.08–7.02 (m, 2H), 6.99–6.93 (m, 6H), 6.91–6.89 (m, 2H), 6.79–6.74 (m, 1H), 6.70–6.66 (m, 2H), 6.64 (tt,  $J = 7.2, 1.2$  Hz, 1H), 6.62–6.57 (m, 2H), 6.56–6.52 (m, 1H), 4.45 (s, 1H, *CHPh*), 3.32 (hept,  $J = 6.8$  Hz, 2H, *CH(CH*<sub>3</sub>*)*<sub>2</sub>), 3.14 (hept,  $J = 6.8$  Hz, 2H, *CH(CH*<sub>3</sub>*)*<sub>2</sub>), 1.40 (d,  $J = 6.7$  Hz, 6H, *CH(CH*<sub>3</sub>*)*<sub>2</sub>), 1.04 (d,  $J = 6.9$  Hz, 6H, *CH(CH*<sub>3</sub>*)*<sub>2</sub>), 0.89 (d,  $J = 6.9$  Hz, 6H, *CH(CH*<sub>3</sub>*)*<sub>2</sub>), 0.85 (d,  $J = 6.7$  Hz, 6H, *CH(CH*<sub>3</sub>*)*<sub>2</sub>). <sup>13</sup>C NMR (151 MHz, C<sub>6</sub>D<sub>6</sub>)  $\delta$  147.4 (Dipp-C), 146.4 (Dipp-C), 141.0 (Ph-C), 140.5 (Ph-C), 134.1, 133.0 (Dipp-C), 132.6 (Dipp-C), 131.1, 130.7, 130.5, 128.4, 128.1, 127.5, 127.4, 127.0,

125.5 (Dipp-C), 125.2 (Dipp-C), 124.7, 123.6, 123.3, 116.1, 109.9, 70.7, 29.5 (CH(CH<sub>3</sub>)<sub>2</sub>), 29.3 (CH(CH<sub>3</sub>)<sub>2</sub>), 25.1 (CH(CH<sub>3</sub>)<sub>2</sub>), 23.9 (CH(CH<sub>3</sub>)<sub>2</sub>), 23.6 (CH(CH<sub>3</sub>)<sub>2</sub>), 23.4 (CH(CH<sub>3</sub>)<sub>2</sub>). Anal. Calcd. for C<sub>46</sub>H<sub>50</sub>N<sub>2</sub>: C, 87.57; H, 7.99; N, 4.44. Found: C, 87.01; H, 8.46; N, 4.06.

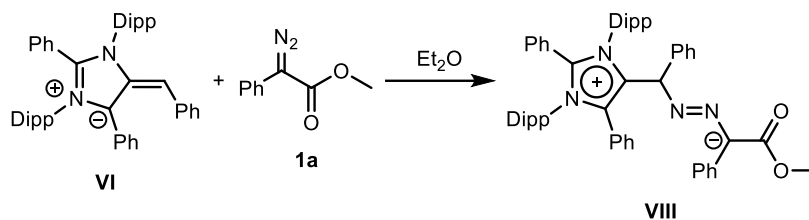

To a stirring solution of **VI** (329. mg, 0.52 mmol) in diethyl ether (1 mL) was added **1a** (92. mg, 0.52 mmol) in diethyl ether (1 mL). The reaction mixture was stirred for 3 h at room temperature and a yellow precipitate gradually formed. The solid was collected by filtration, washed with cold diethyl ether (−35 °C, 1 mL) and *n*-pentane (3 × 1 mL). Yellow solid. Yield: 325. mg, 77%. Crystals suitable for X-ray crystallography were obtained by vapor diffusion of *n*-pentane into a toluene solution at room temperature. The partial dissociation of **VIII** into **VI** and **1a** was observed when **VIII** was dissolved in C<sub>6</sub>D<sub>6</sub> (see Figure S49). <sup>1</sup>H NMR (500 MHz, C<sub>6</sub>D<sub>6</sub>) δ 8.47–8.40 (m, 2H), 7.77–7.64 (m, 2H), 7.60–7.53 (m, 2H), 7.55–7.48 (m, 2H), 6.81–6.78 (m, 1H), 6.76–6.74 (dd, *J* = 7.7, 1.5 Hz, 1H, Dipp-*H*), 6.72–6.70 (m, 2H), 6.25 (s, 1H, im-CH(Ph)-N), 3.84 (s, 3H, COOCH<sub>3</sub>), 3.74 (hept, *J* = 6.5 Hz, 1H, CH(CH<sub>3</sub>)<sub>2</sub>), 3.64 (hept, *J* = 6.5 Hz, 1H, CH(CH<sub>3</sub>)<sub>2</sub>), 3.09 (hept, *J* = 6.7 Hz, 1H, CH(CH<sub>3</sub>)<sub>2</sub>), 2.56 (hept, *J* = 6.7 Hz, 1H, CH(CH<sub>3</sub>)<sub>2</sub>), 1.46 (d, *J* = 6.6 Hz, 3H, CH(CH<sub>3</sub>)<sub>2</sub>), 1.45 (d, *J* = 6.5 Hz, 3H, CH(CH<sub>3</sub>)<sub>2</sub>), 1.20 (d, *J* = 6.8 Hz, 3H, CH(CH<sub>3</sub>)<sub>2</sub>), 1.16 (d, *J* = 6.8 Hz, 3H, CH(CH<sub>3</sub>)<sub>2</sub>), 0.98 (d, *J* = 6.7 Hz, 3H, CH(CH<sub>3</sub>)<sub>2</sub>), 0.56 (d, *J* = 6.5 Hz, 3H, CH(CH<sub>3</sub>)<sub>2</sub>), 0.40 (d, *J* = 6.7 Hz, 3H, CH(CH<sub>3</sub>)<sub>2</sub>), 0.40 (d, *J* = 6.7 Hz, 3H, CH(CH<sub>3</sub>)<sub>2</sub>). HRMS (ESI): *m/z* calcd. for C<sub>55</sub>H<sub>59</sub>N<sub>4</sub>O<sub>2</sub> [M+H]<sup>+</sup> 807.4633, found 807.4639.

## 2. NMR spectra

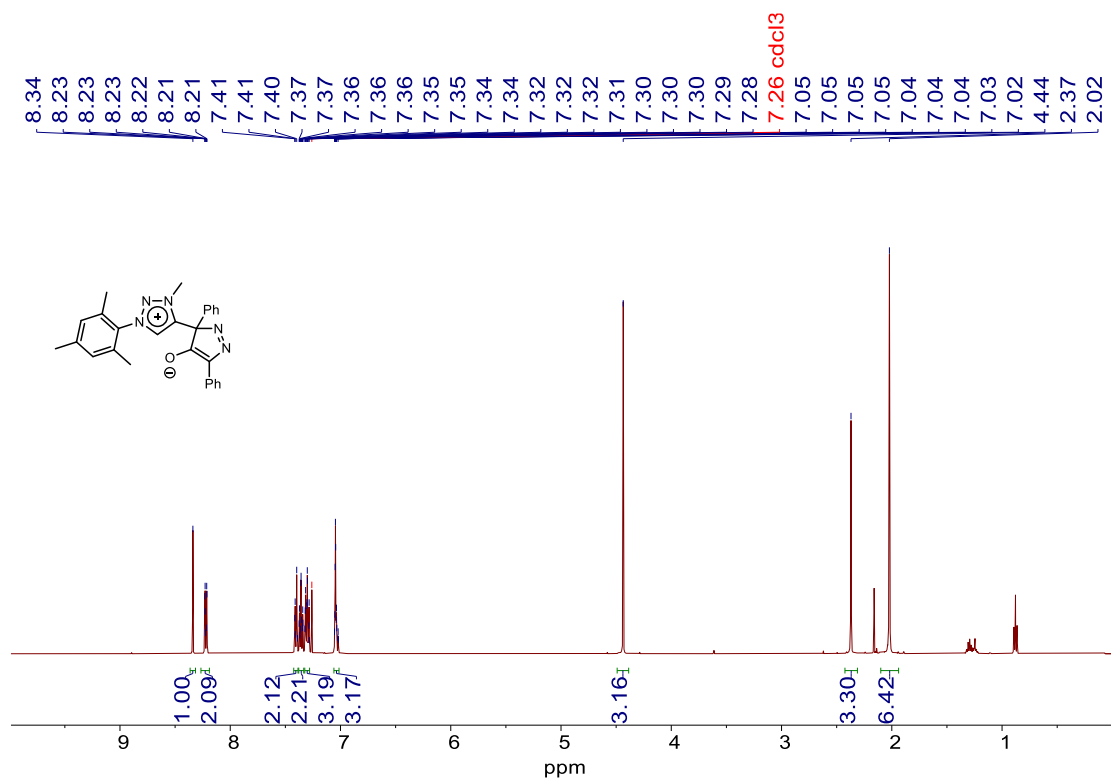

Figure S1. <sup>1</sup>H NMR (500 MHz, CDCl<sub>3</sub>) spectrum of 3aa.

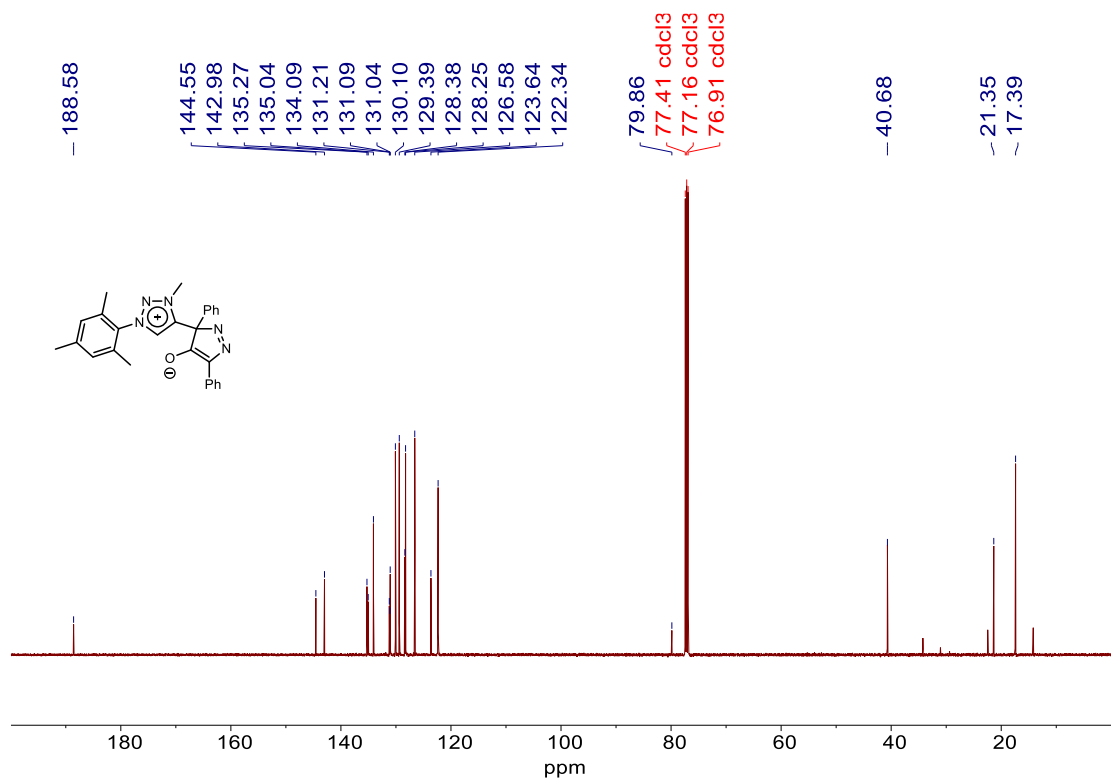

Figure S2. <sup>13</sup>C NMR (126 MHz, CDCl<sub>3</sub>) spectrum of 3aa.



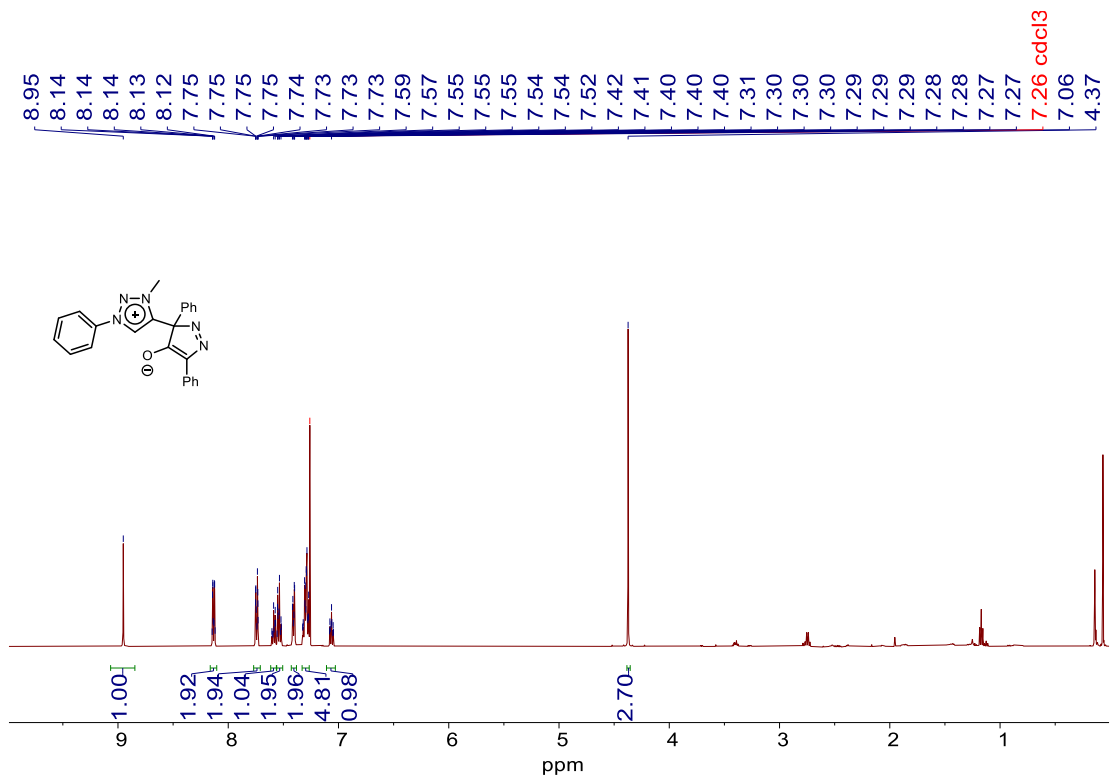

**Figure S3.** <sup>1</sup>H NMR (500 MHz, CDCl<sub>3</sub>) spectrum of **3ab**.

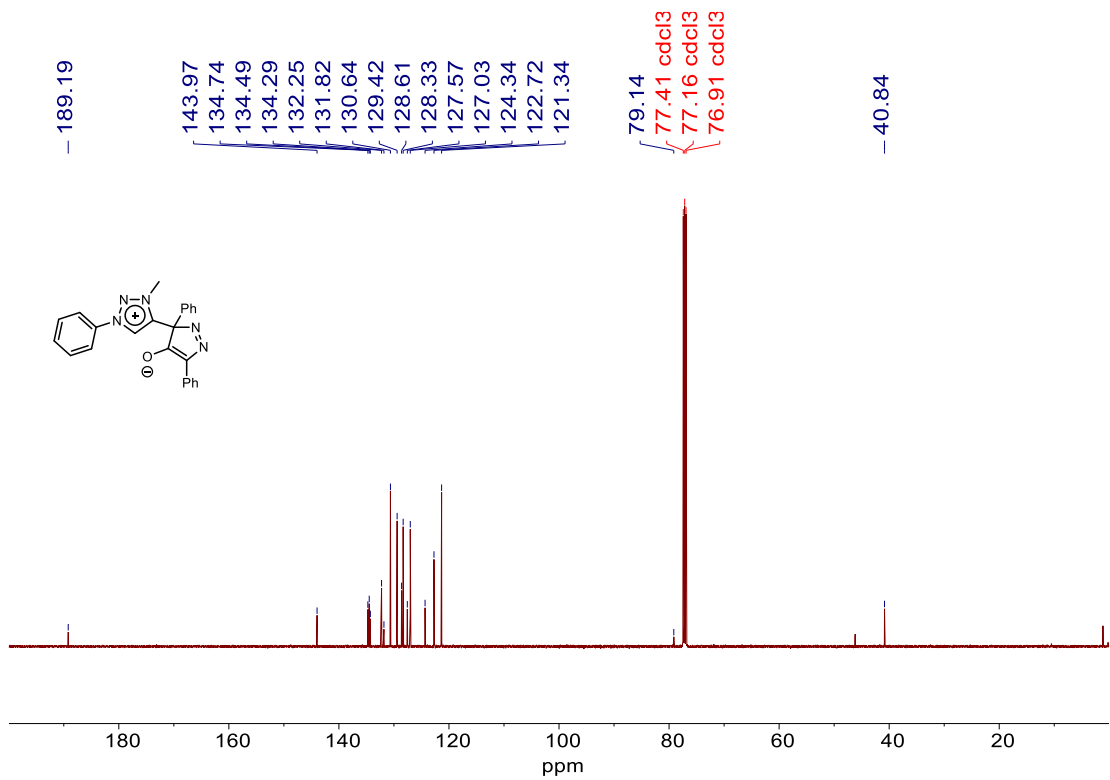

**Figure S4.** <sup>13</sup>C NMR (126 MHz, CDCl<sub>3</sub>) spectrum of **3ab**.

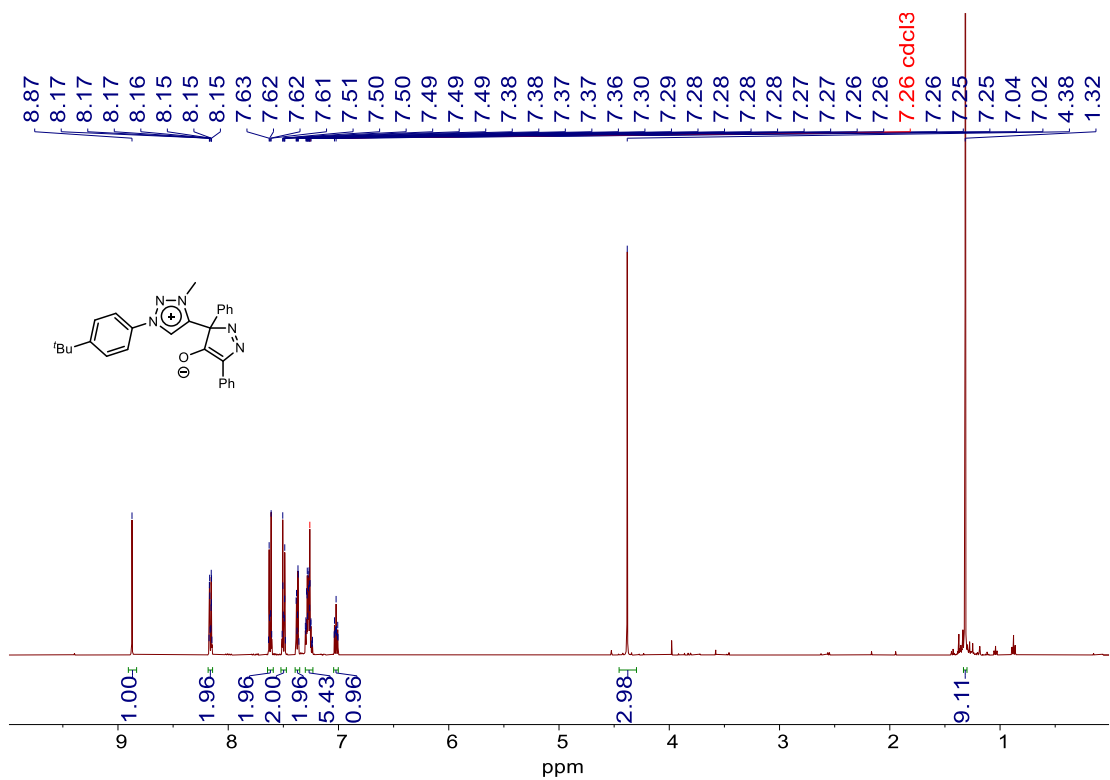

Figure S5.  $^1\text{H}$  NMR (500 MHz,  $\text{CDCl}_3$ ) spectrum of **3ac**.

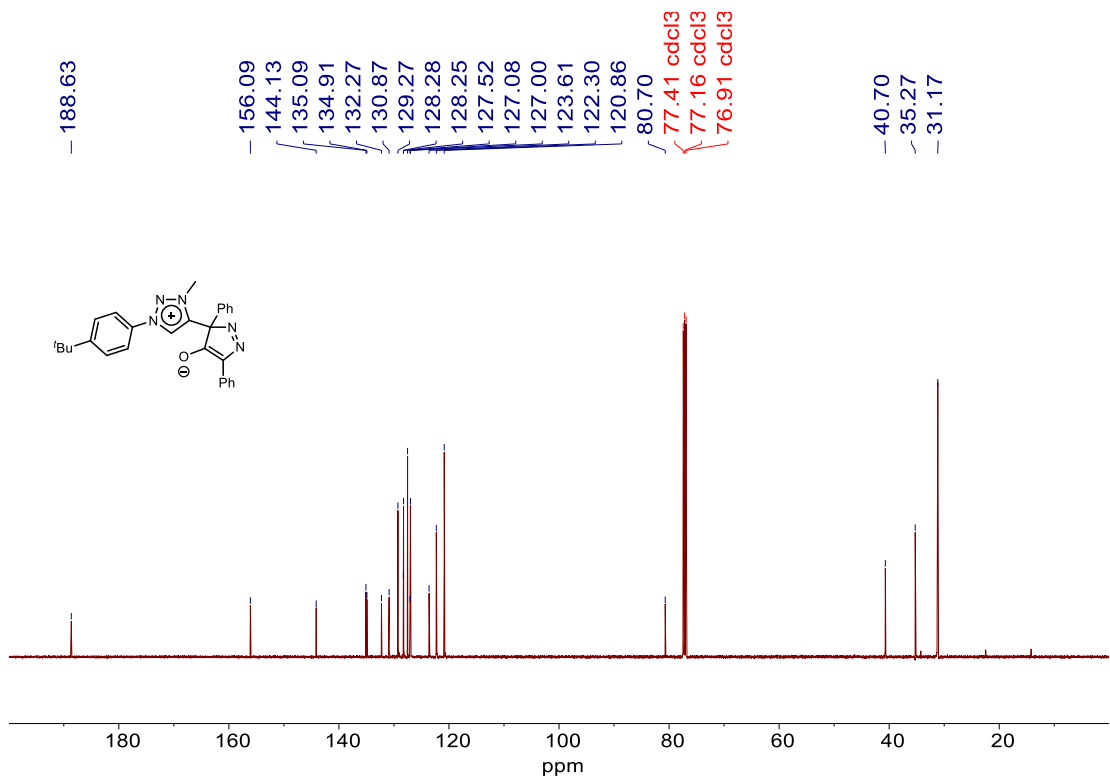

Figure S6.  $^{13}\text{C}$  NMR (126 MHz,  $\text{CDCl}_3$ ) spectrum of **3ac**.

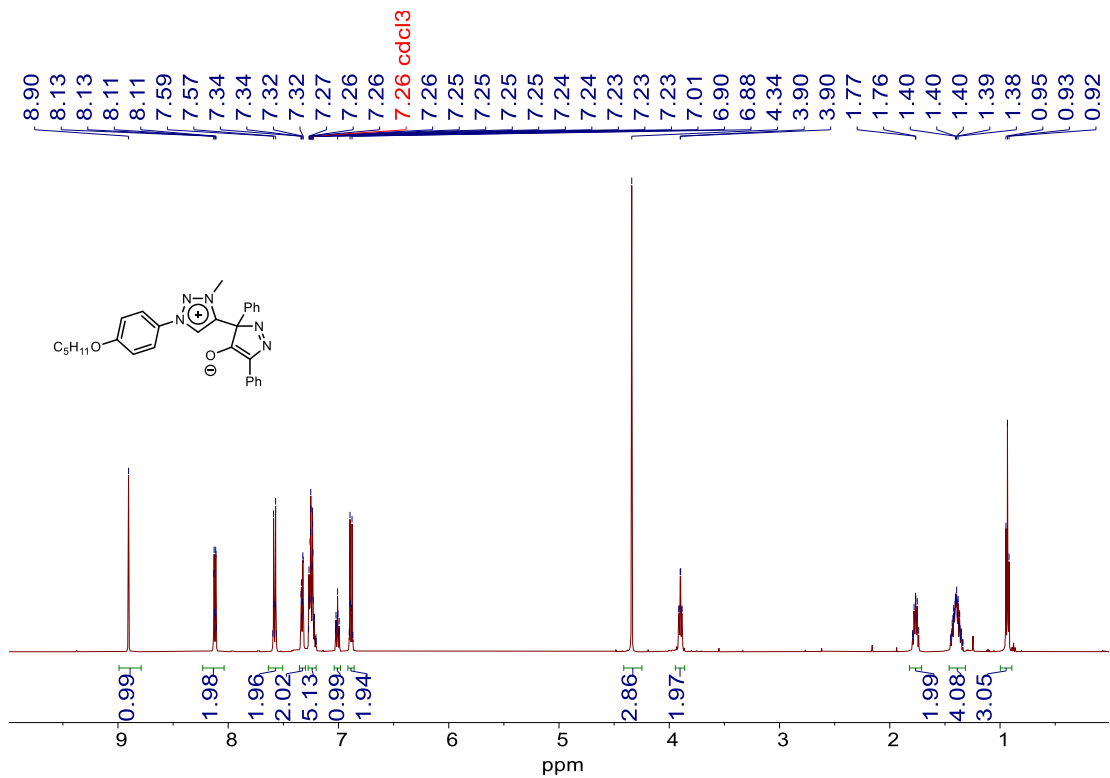

**Figure S7.**  $^1\text{H}$  NMR (500 MHz,  $\text{CDCl}_3$ ) spectrum of **3ad**.

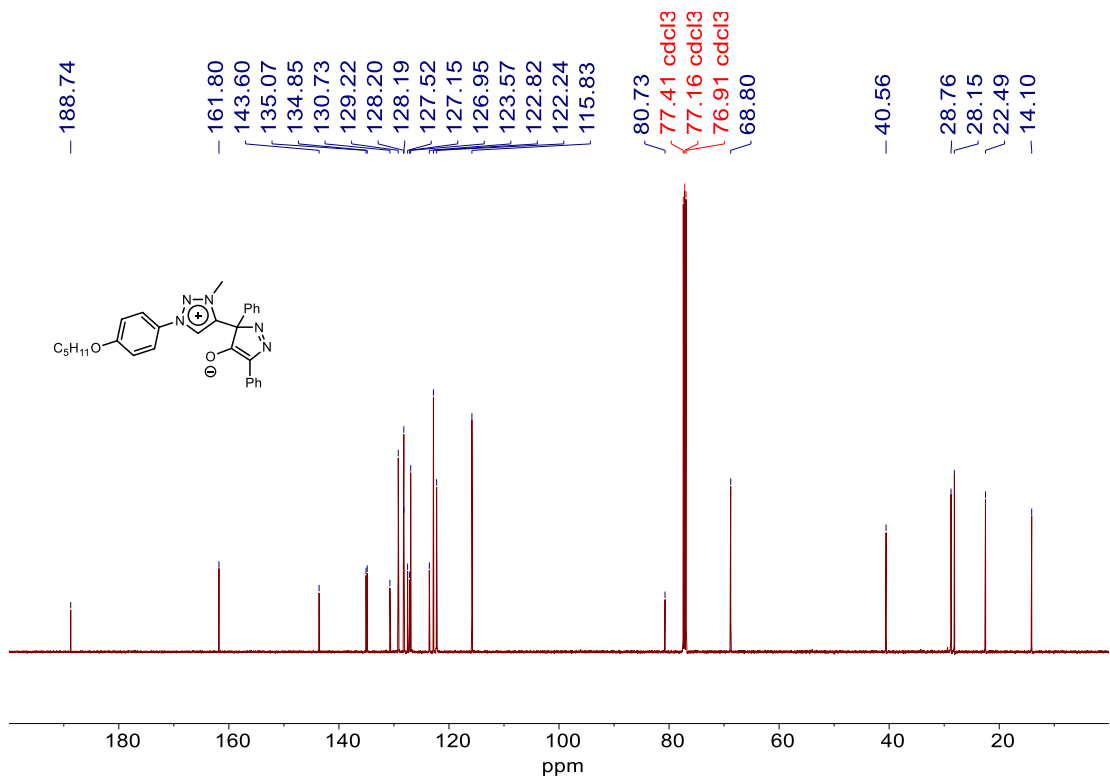

**Figure S8.**  $^{13}\text{C}$  NMR (126 MHz,  $\text{CDCl}_3$ ) spectrum of **3ad**.

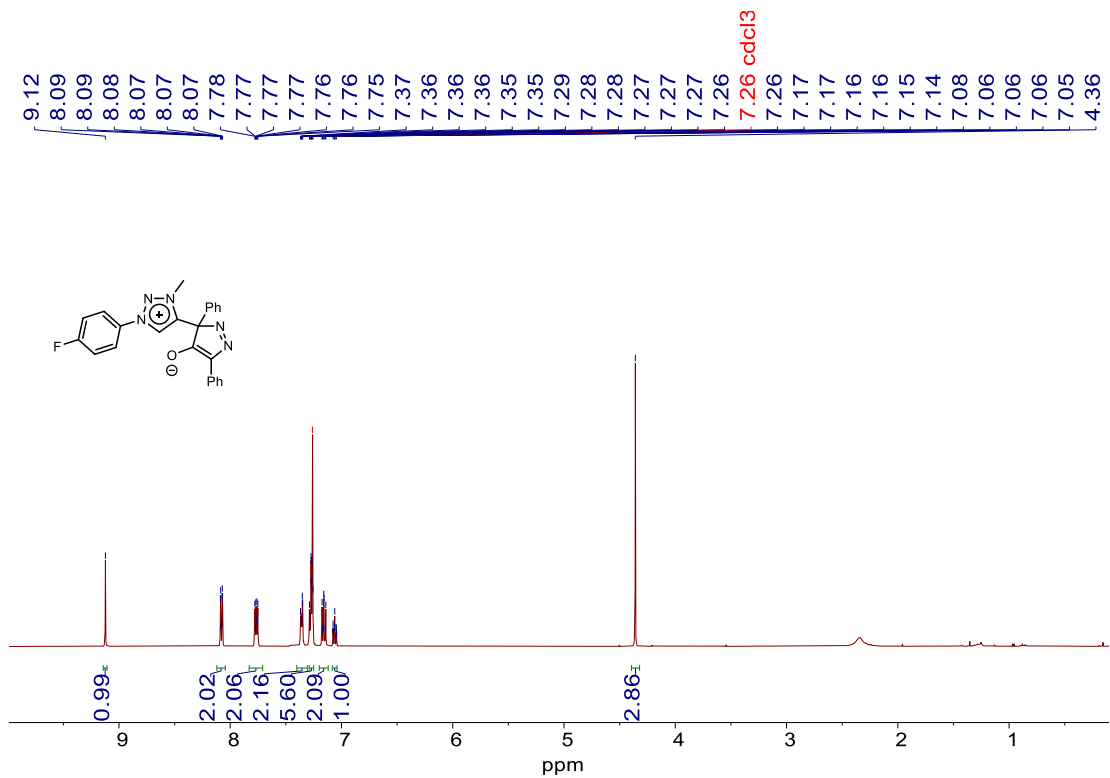

**Figure S9.**  $^1\text{H}$  NMR (500 MHz,  $\text{CDCl}_3$ ) spectrum of **3ae**.

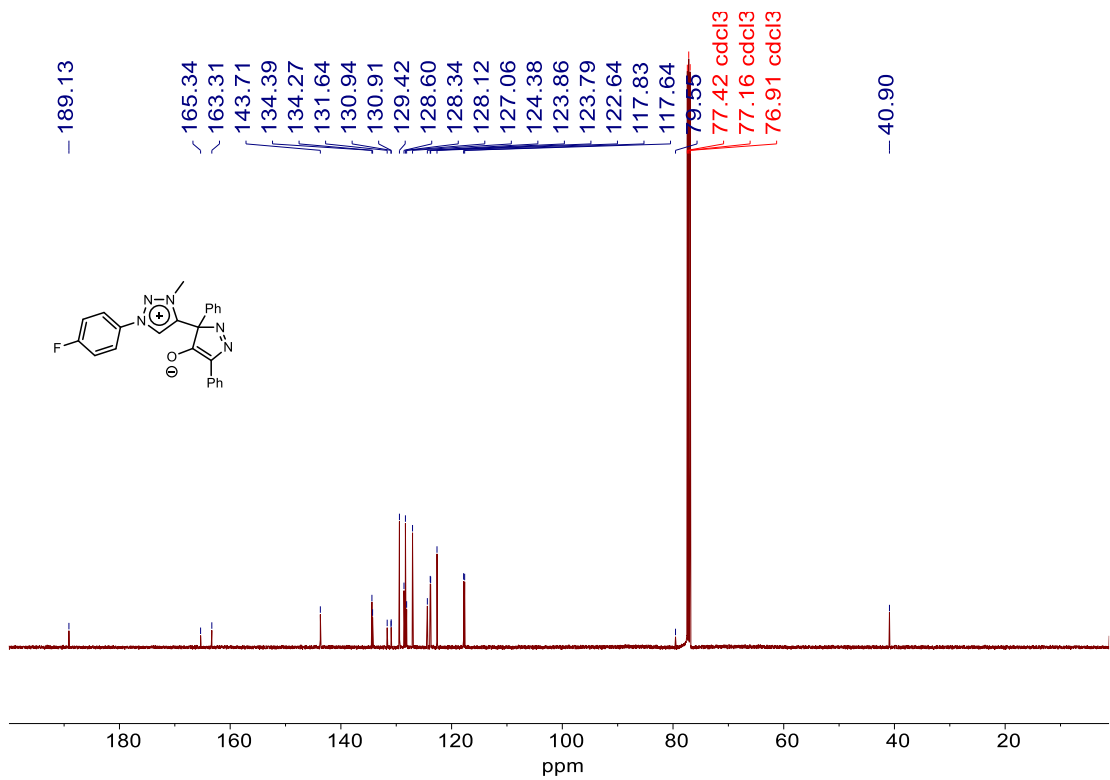

**Figure S10.**  $^{13}\text{C}$  NMR (126 MHz,  $\text{CDCl}_3$ ) spectrum of **3ae**.

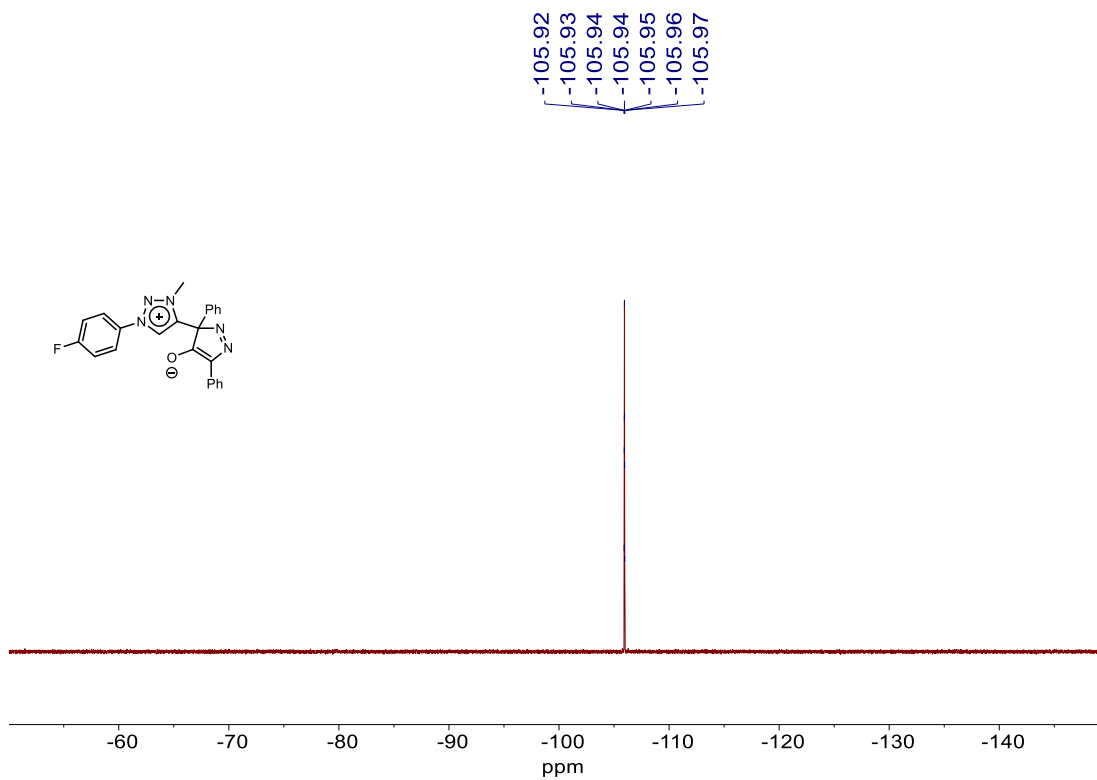

**Figure S11.**  $^{19}\text{F}$  NMR (470 MHz,  $\text{CDCl}_3$ ) spectrum of **3ae**.

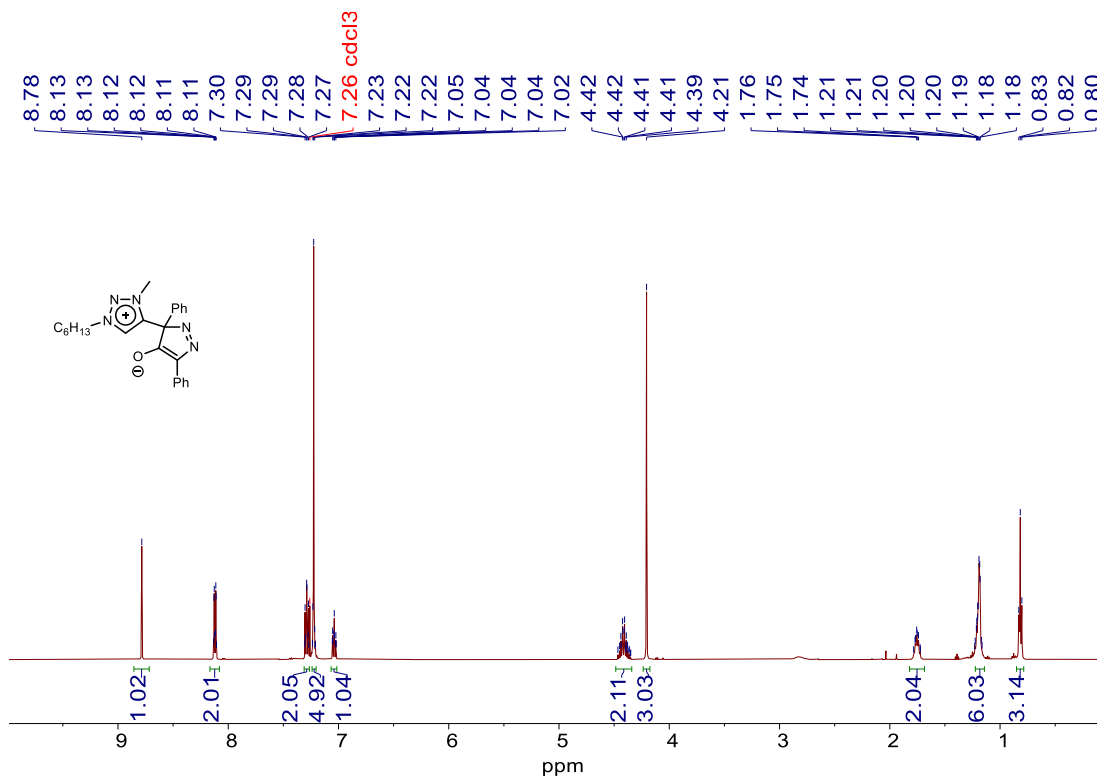

**Figure S12.**  $^1\text{H}$  NMR (500 MHz,  $\text{CDCl}_3$ ) spectrum of **3af**.

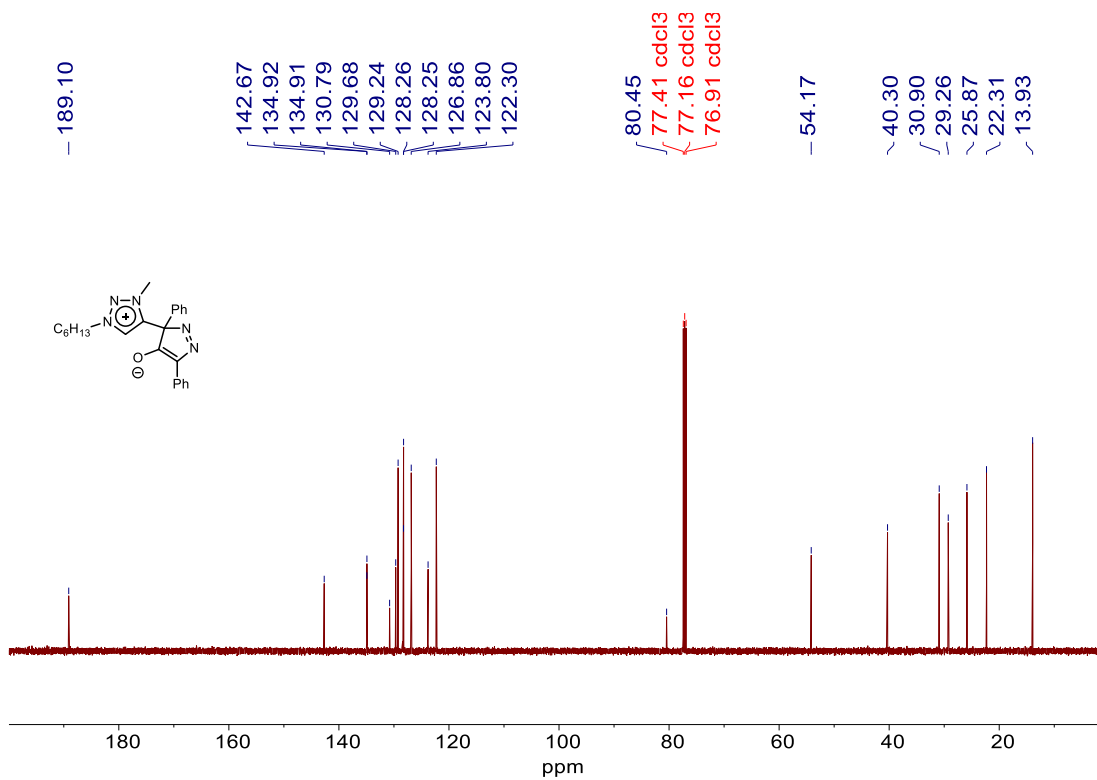

**Figure S13.**  $^{13}\text{C}$  NMR (126 MHz,  $\text{CDCl}_3$ ) spectrum of **3af**.

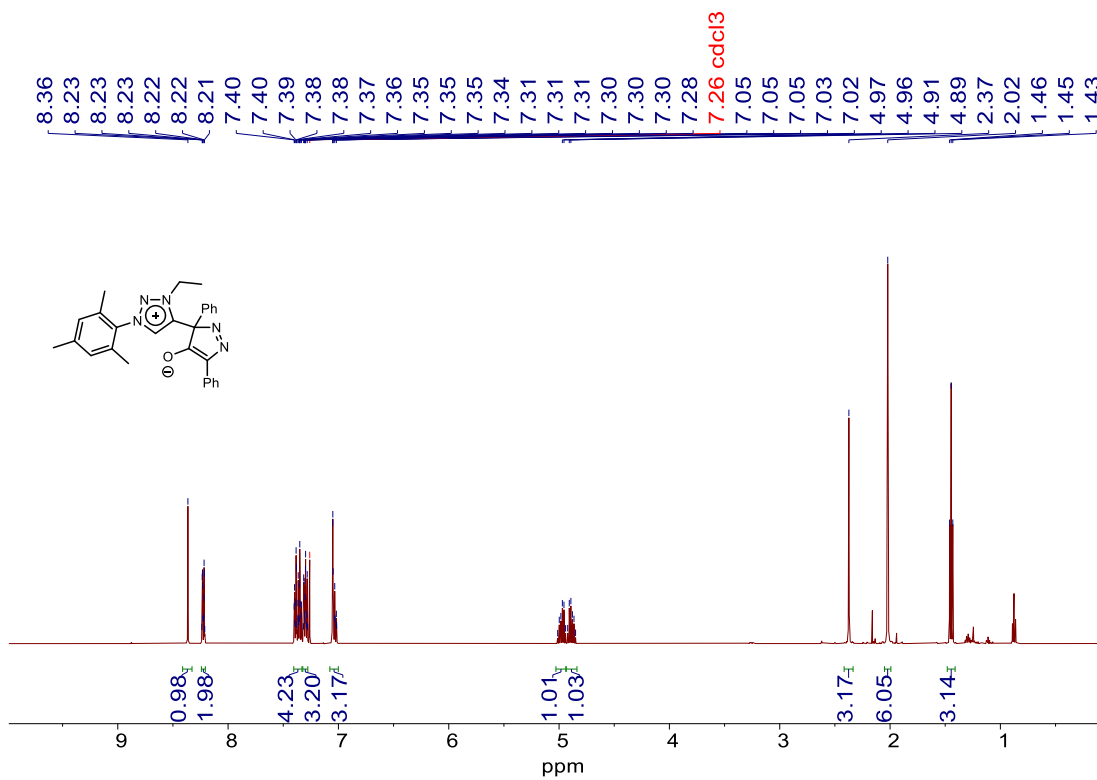

**Figure S14.**  $^1\text{H}$  NMR (500 MHz,  $\text{CDCl}_3$ ) spectrum of **3ag**.

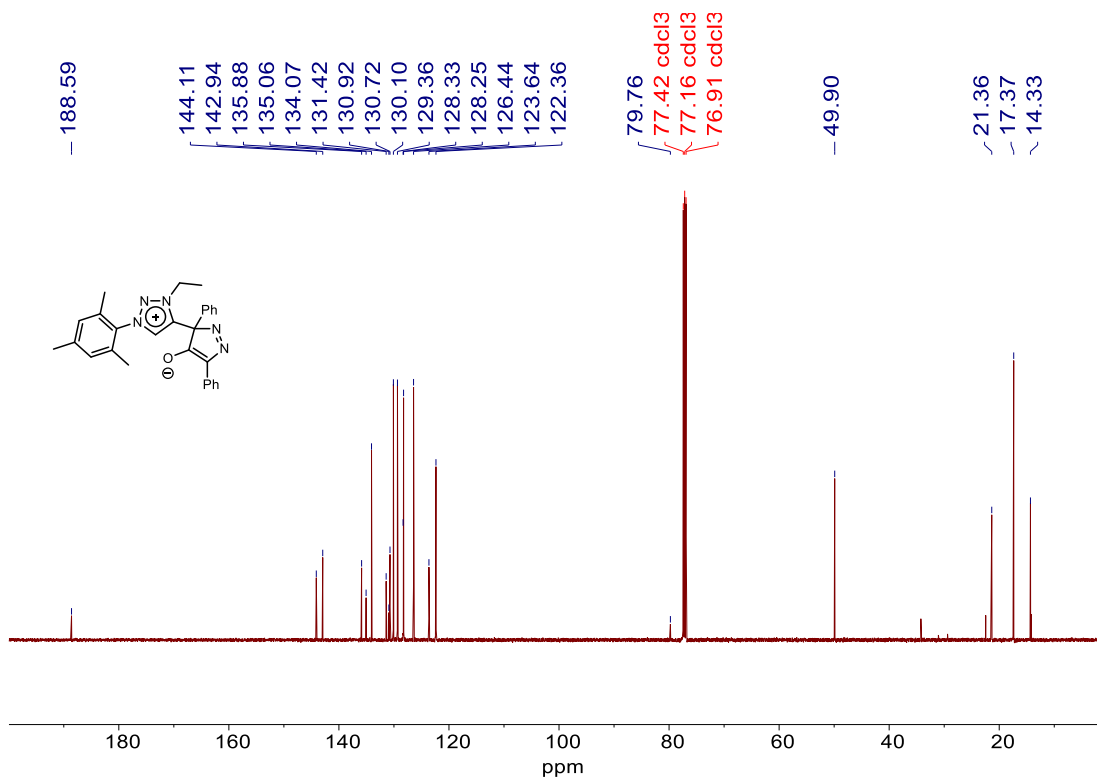

Figure S15. <sup>13</sup>C NMR (126 MHz, CDCl<sub>3</sub>) spectrum of 3ag.

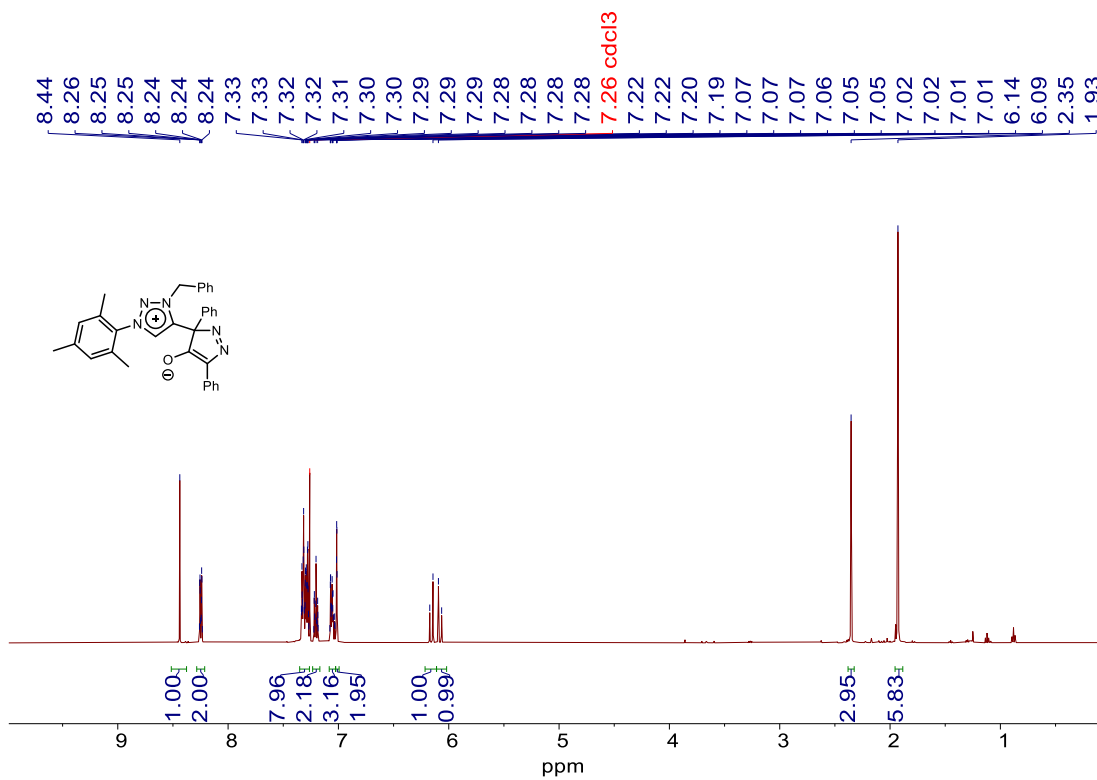

Figure S16. <sup>1</sup>H NMR (500 MHz, CDCl<sub>3</sub>) spectrum of 3ah.

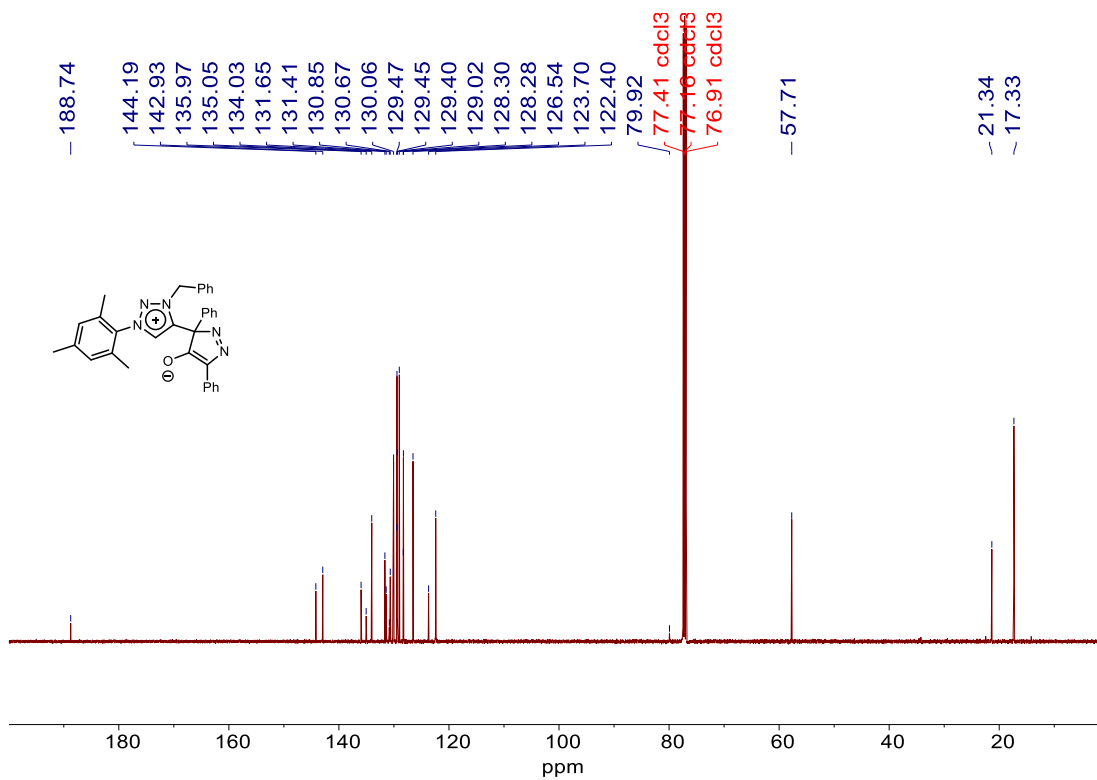

**Figure S17.**  $^{13}\text{C}$  NMR (126 MHz,  $\text{CDCl}_3$ ) spectrum of **3ah**.

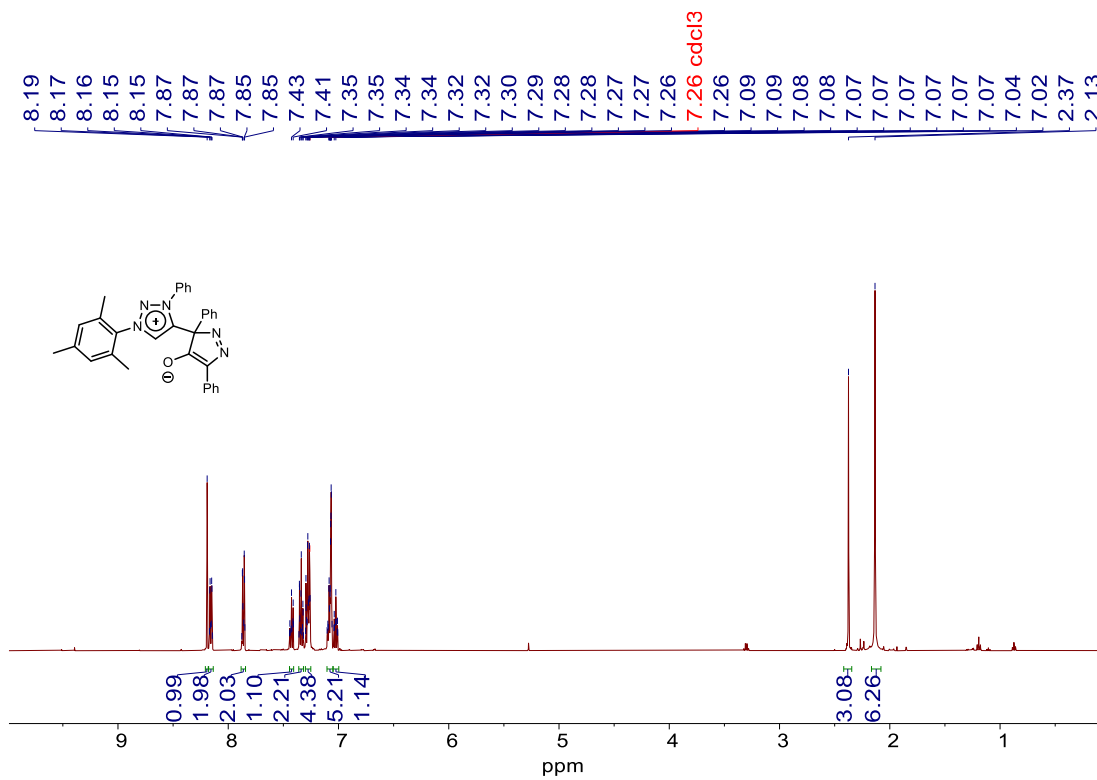

**Figure S18.**  $^1\text{H}$  NMR (500 MHz,  $\text{CDCl}_3$ ) spectrum of **3ai**.



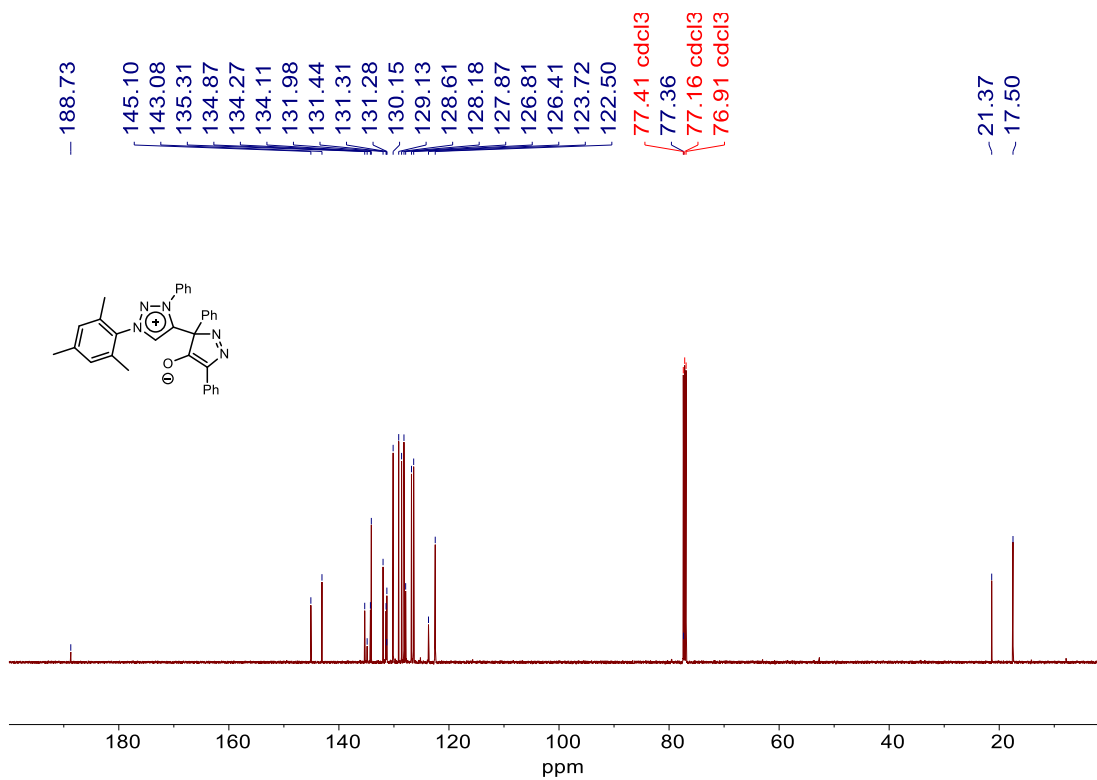

Figure S19.  $^{13}\text{C}$  NMR (126 MHz,  $\text{CDCl}_3$ ) spectrum of 3ai.

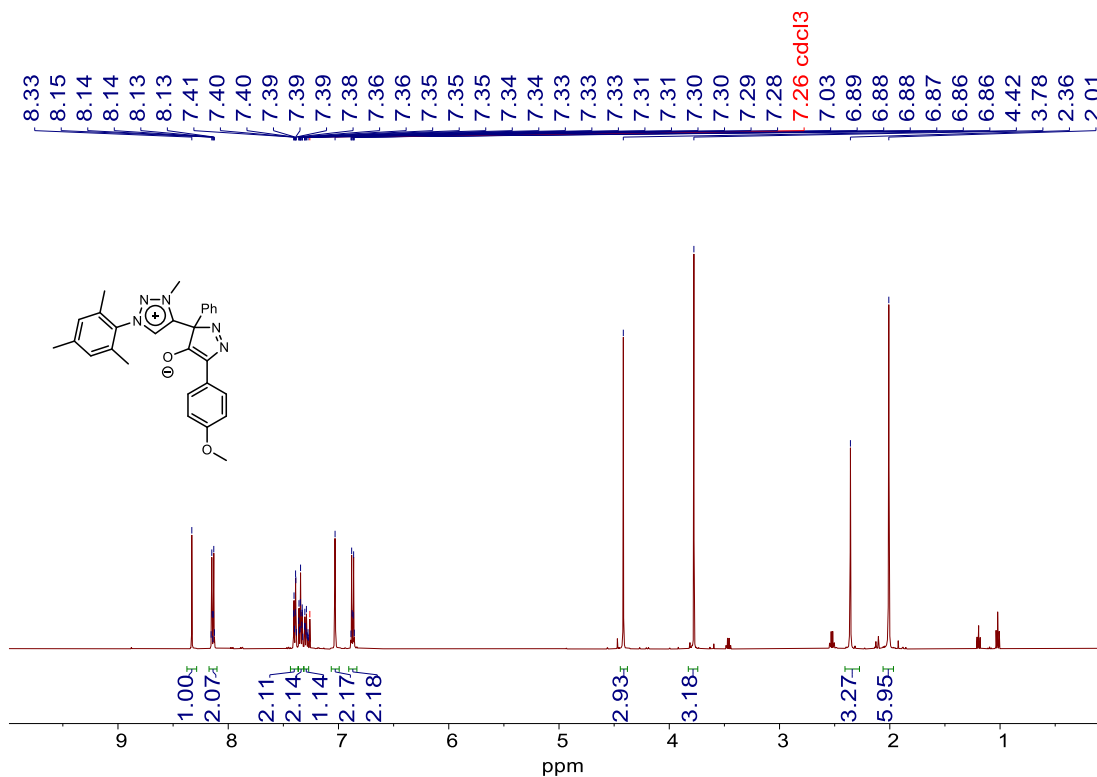

Figure S20.  $^1\text{H}$  NMR (500 MHz,  $\text{CDCl}_3$ ) spectrum of 3ba.

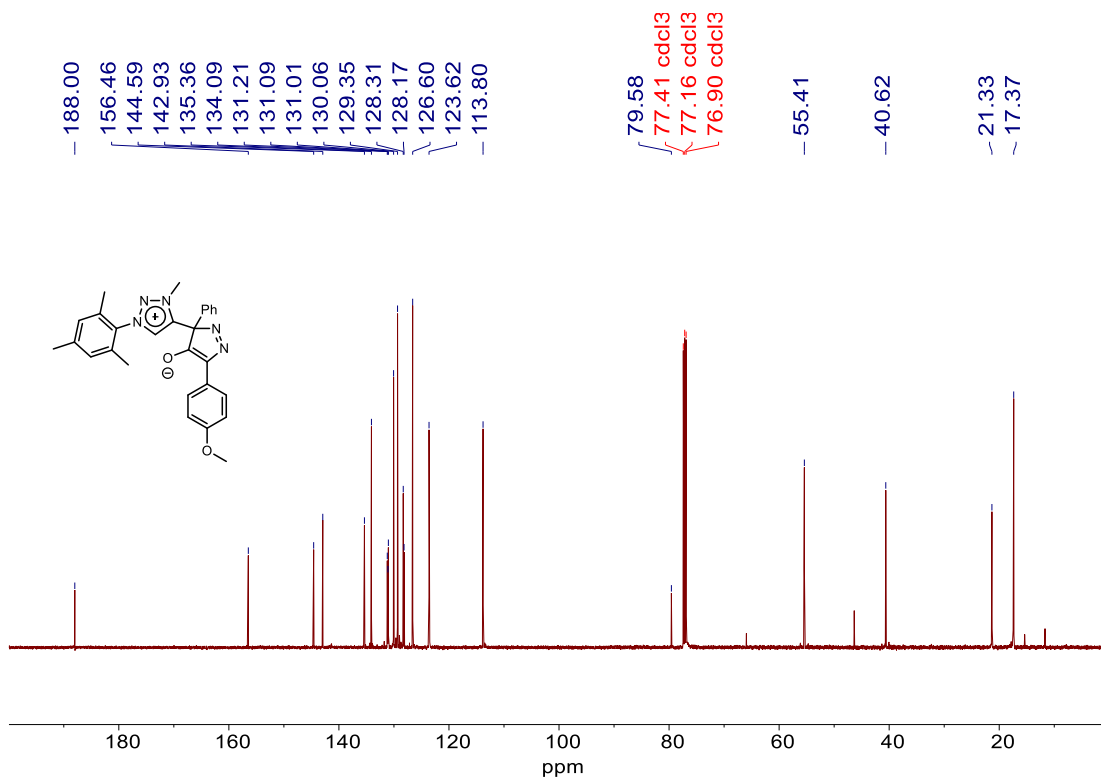

Figure S21. <sup>13</sup>C NMR (126 MHz, CDCl<sub>3</sub>) spectrum of 3ba.

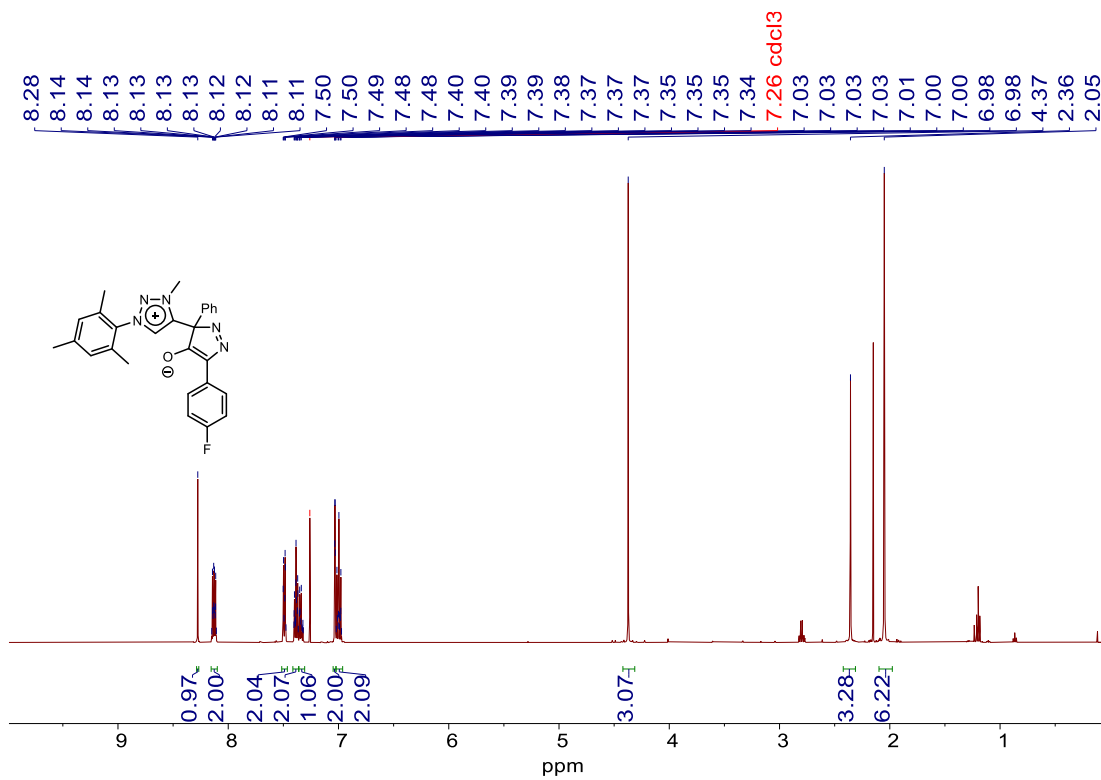

Figure S22. <sup>1</sup>H NMR (500 MHz, CDCl<sub>3</sub>) spectrum of 3ca.

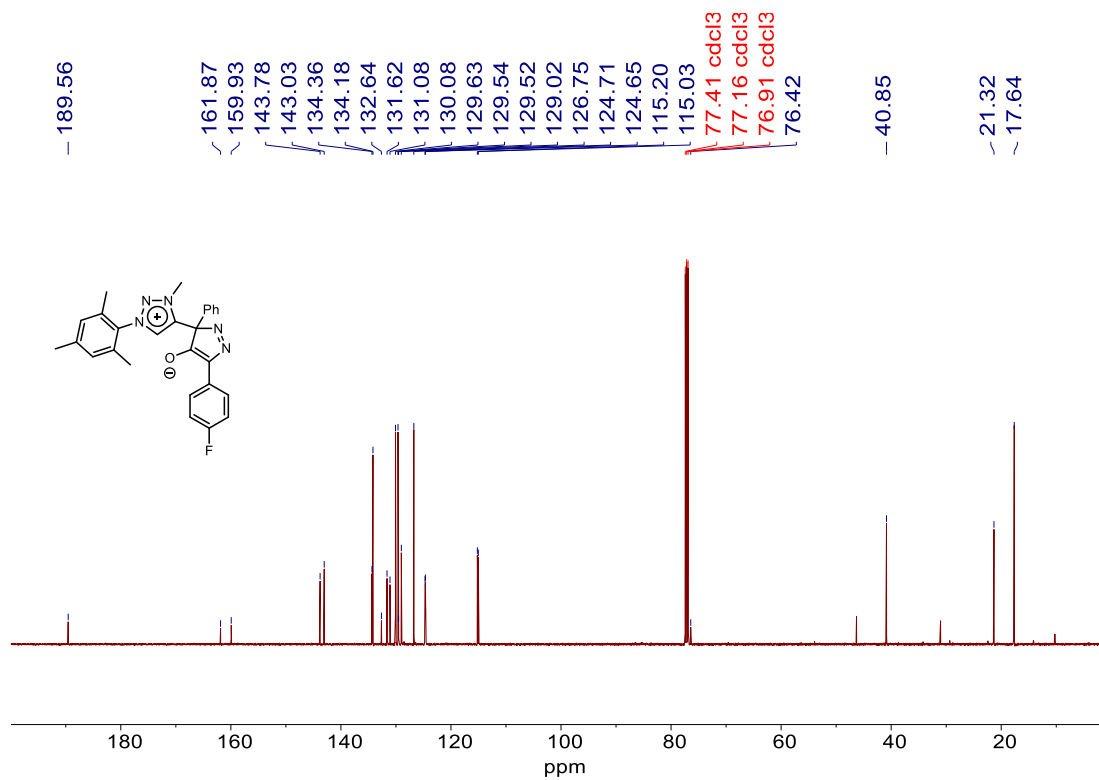

**Figure S23.**  $^{13}\text{C}$  NMR (126 MHz,  $\text{CDCl}_3$ ) spectrum of **3ca**.

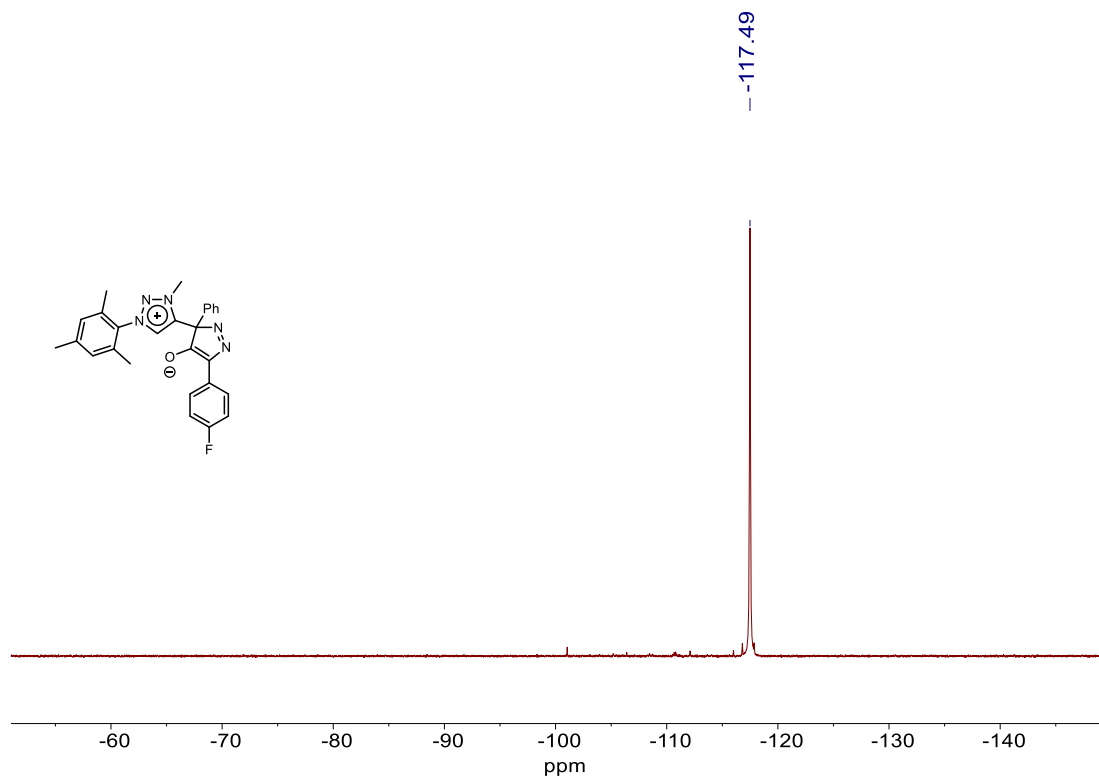

**Figure S24.**  $^{19}\text{F}$  NMR (470 MHz,  $\text{CDCl}_3$ ) spectrum of **3ca**.

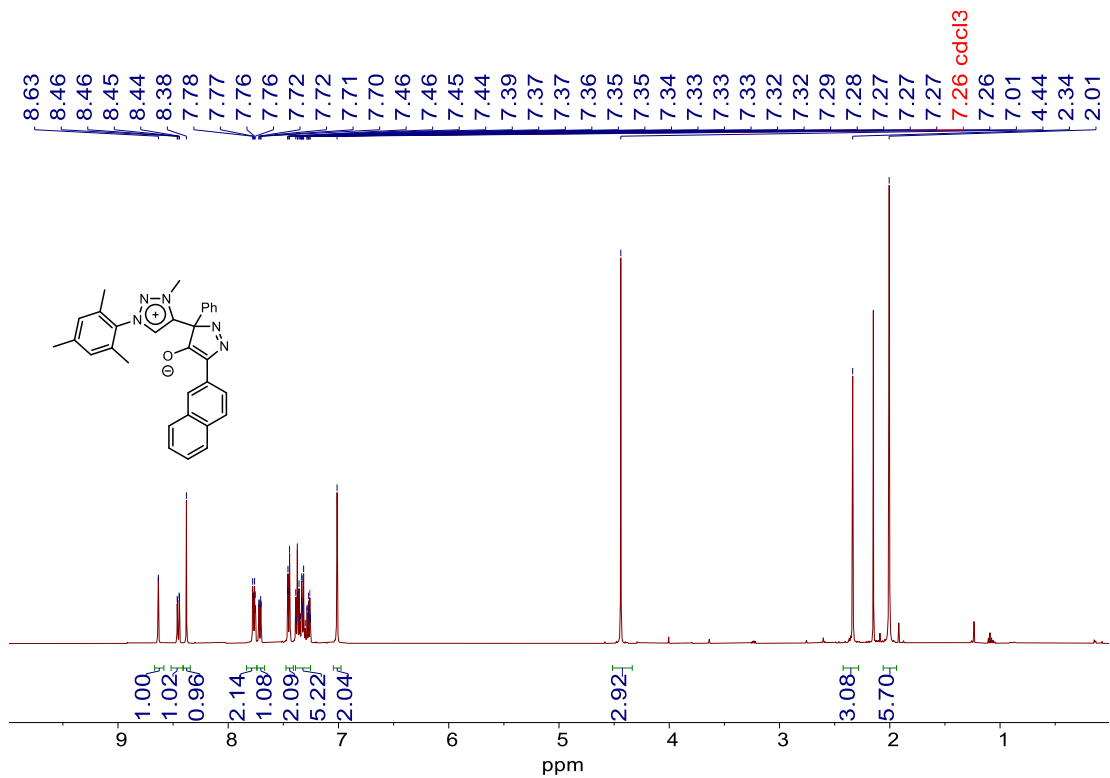

**Figure S25.**  $^1\text{H}$  NMR (500 MHz,  $\text{CDCl}_3$ ) spectrum of **3da**.

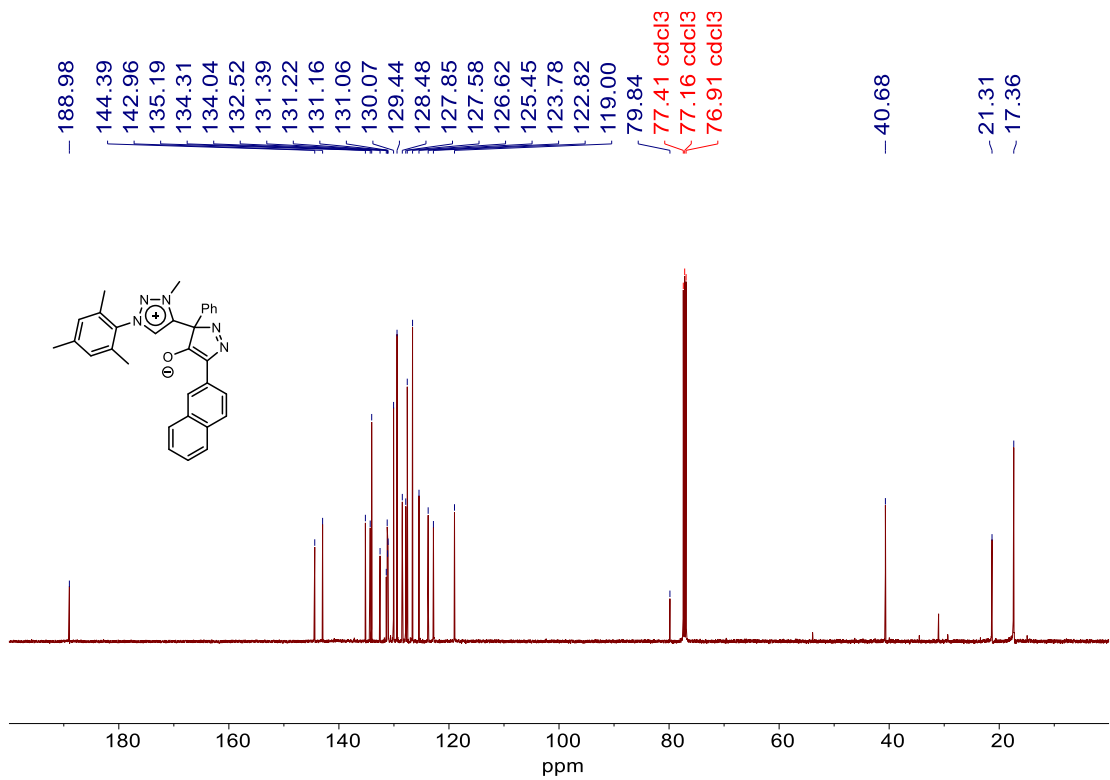

**Figure S26.**  $^{13}\text{C}$  NMR (126 MHz,  $\text{CDCl}_3$ ) spectrum of **3da**.

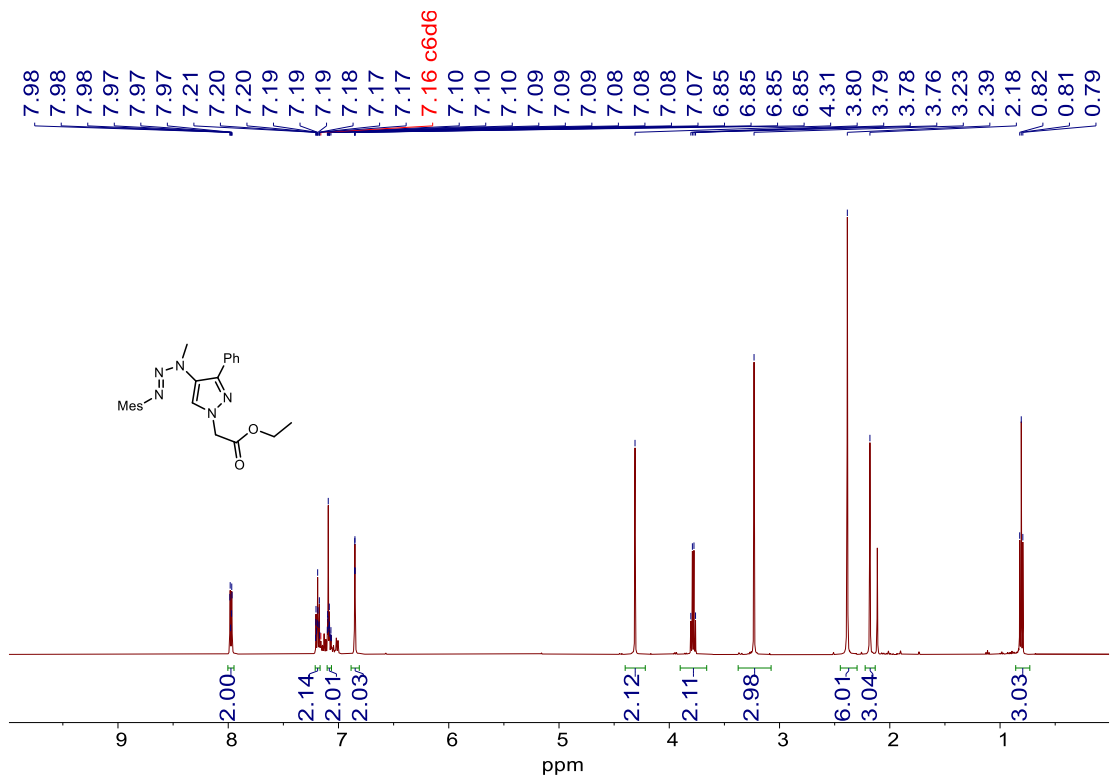

Figure S27.  $^1\text{H}$  NMR (500 MHz,  $\text{C}_6\text{D}_6$ ) spectrum of **6**.

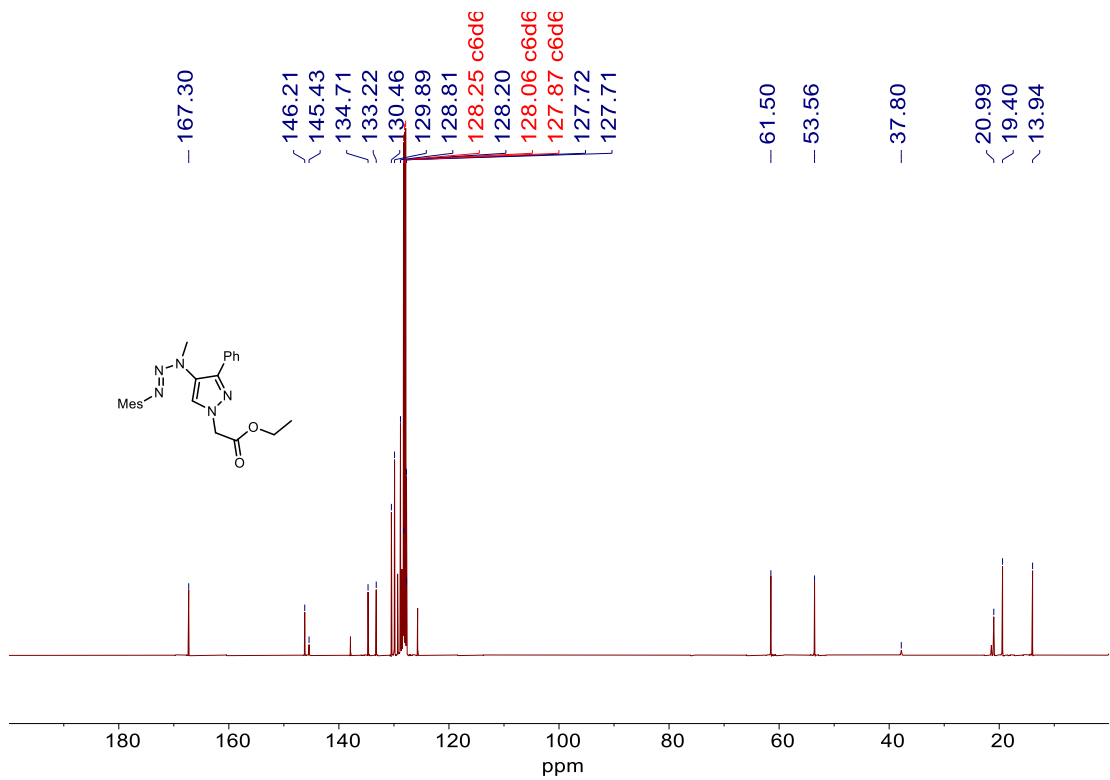

Figure S28.  $^{13}\text{C}$  NMR (126 MHz,  $\text{C}_6\text{D}_6$ ) spectrum of **6**.

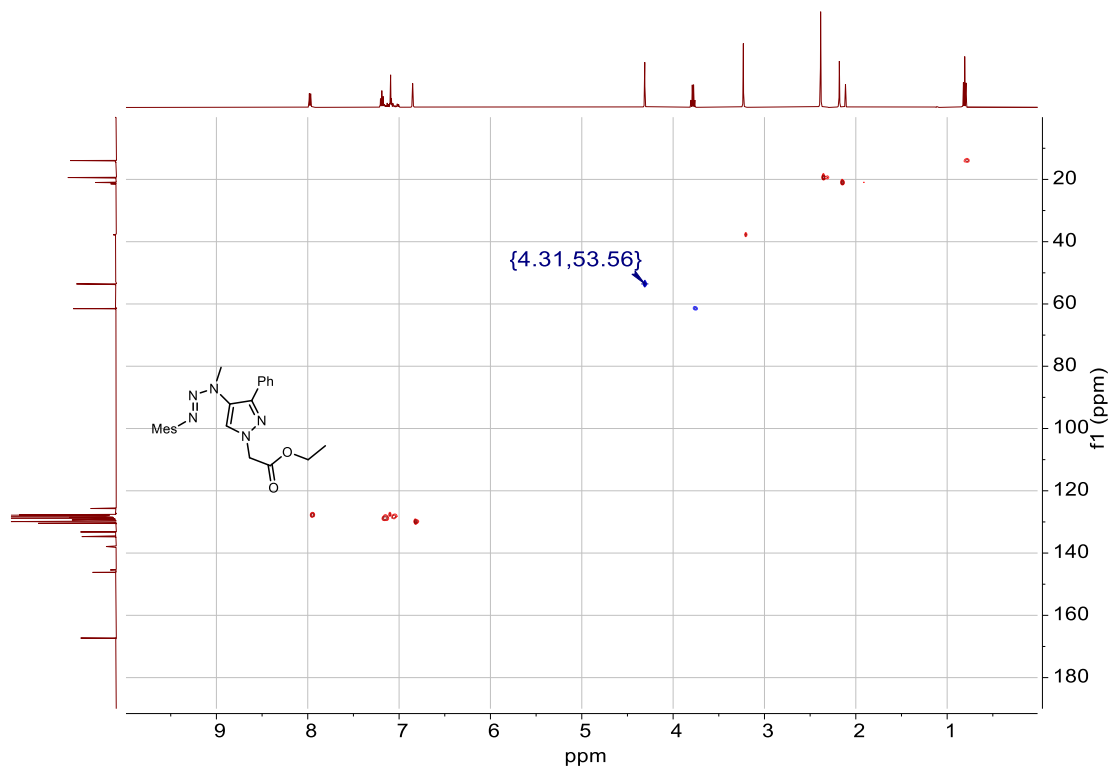

**Figure S29.**  $^1\text{H}$ - $^{13}\text{C}$ -HSQC NMR (500 MHz,  $\text{C}_6\text{D}_6$ ) of **6**.

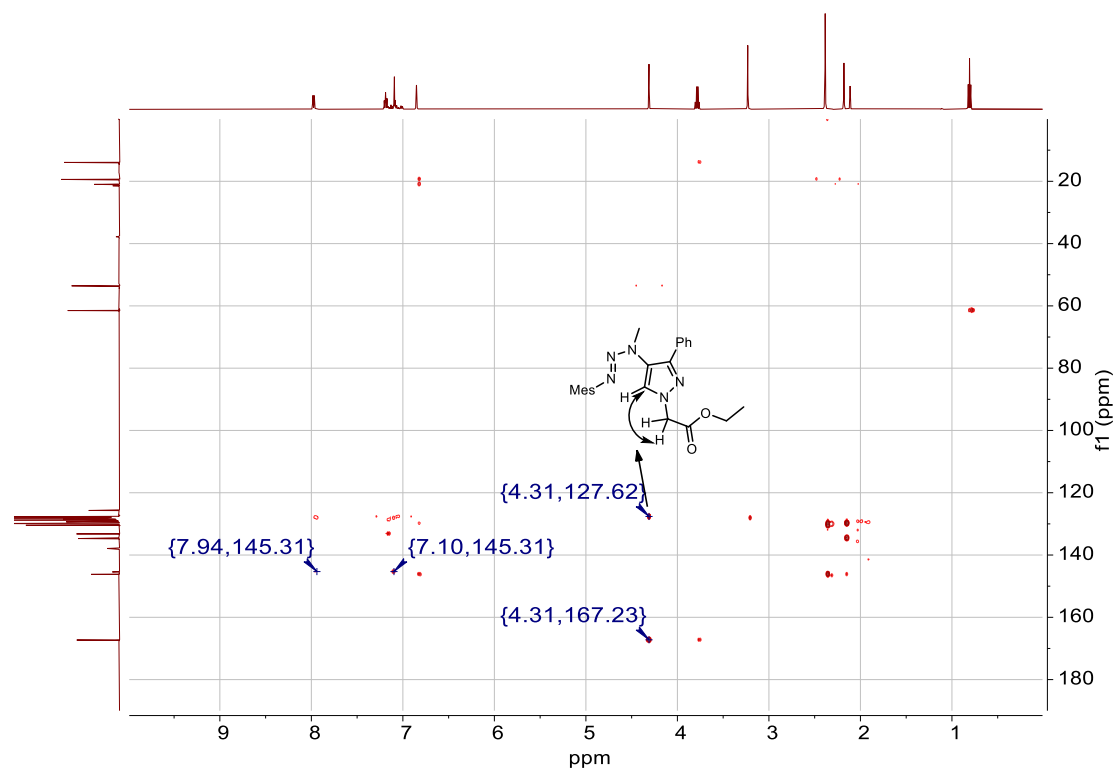

**Figure S30.**  $^1\text{H}$ - $^{13}\text{C}$ -HMBC NMR (500 MHz,  $\text{C}_6\text{D}_6$ ) of **6**.

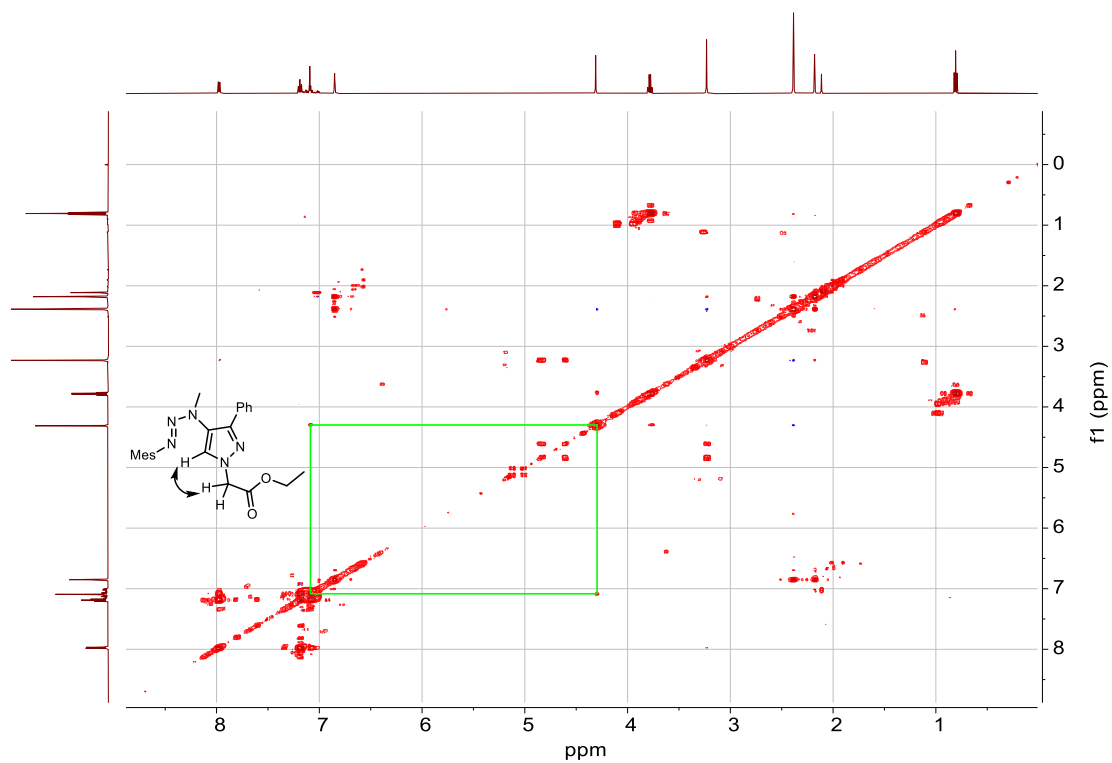

**Figure S31.**  $^1\text{H}$ - $^1\text{H}$ -COSY NMR (500 MHz,  $\text{C}_6\text{D}_6$ ) of **6**.

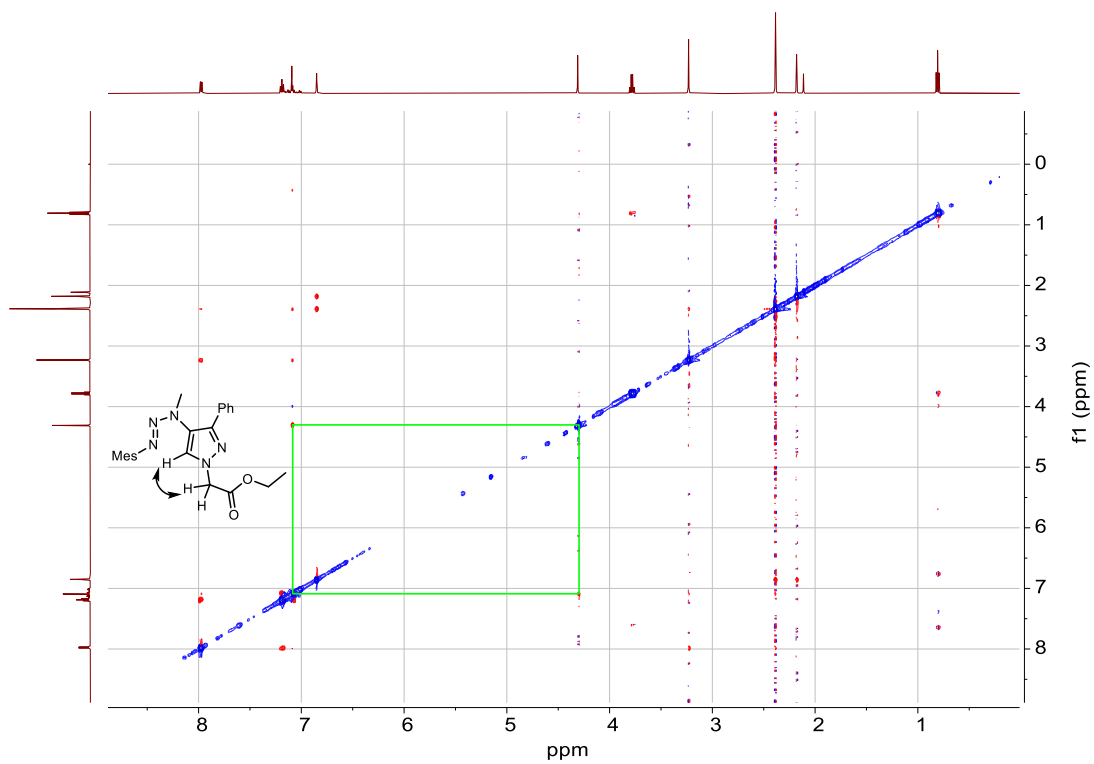

**Figure S32.** 2d-NOESY NMR (500 MHz,  $\text{C}_6\text{D}_6$ ) of **6**.

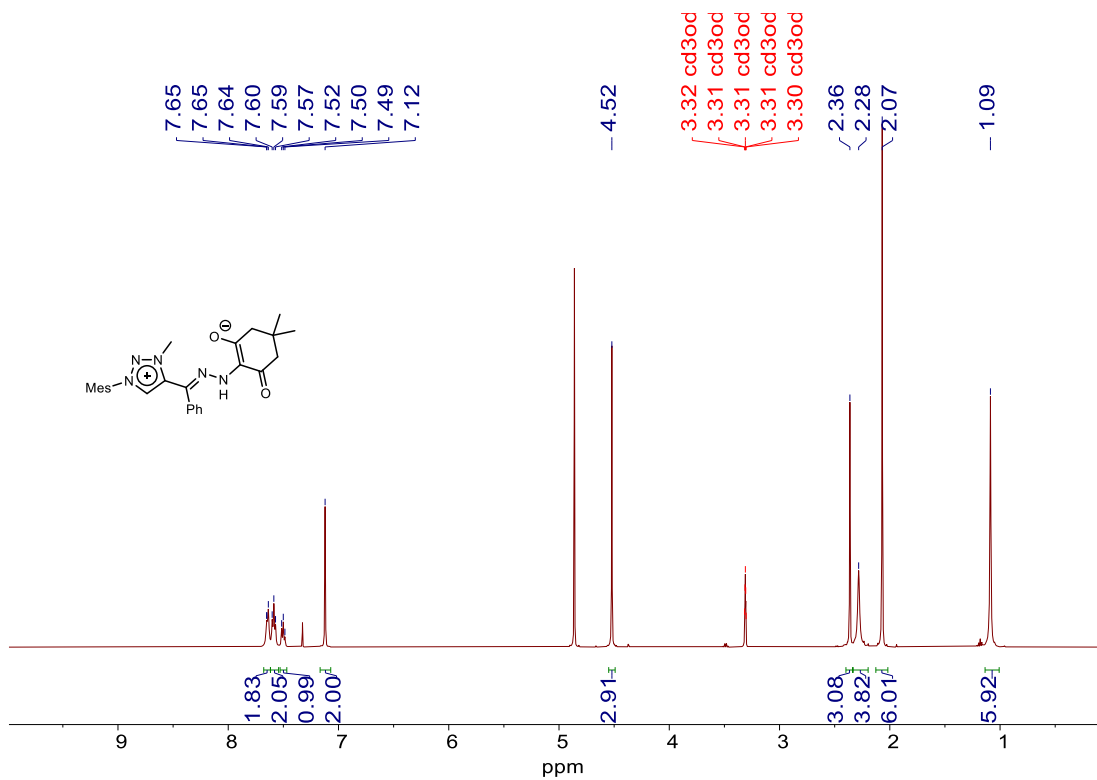

**Figure S33.** <sup>1</sup>H NMR (500 MHz, CD<sub>3</sub>OD) spectrum of **8**.

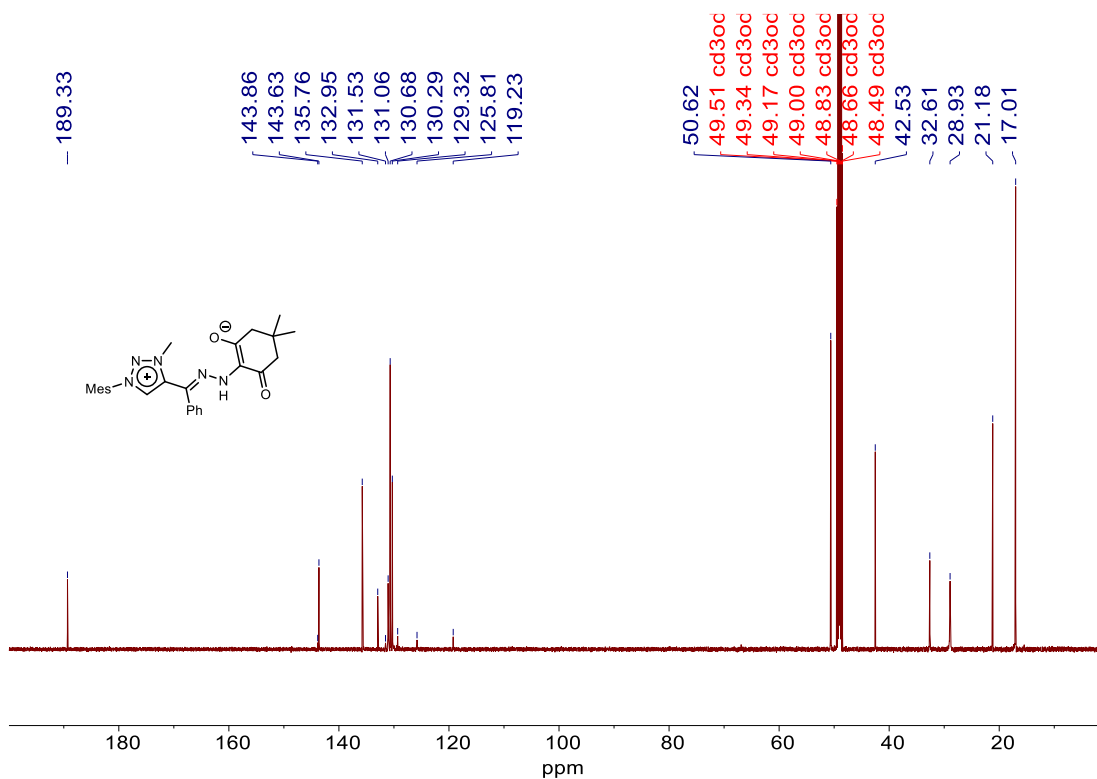

**Figure S34.** <sup>13</sup>C NMR (126 MHz, CD<sub>3</sub>OD) spectrum of **8**.



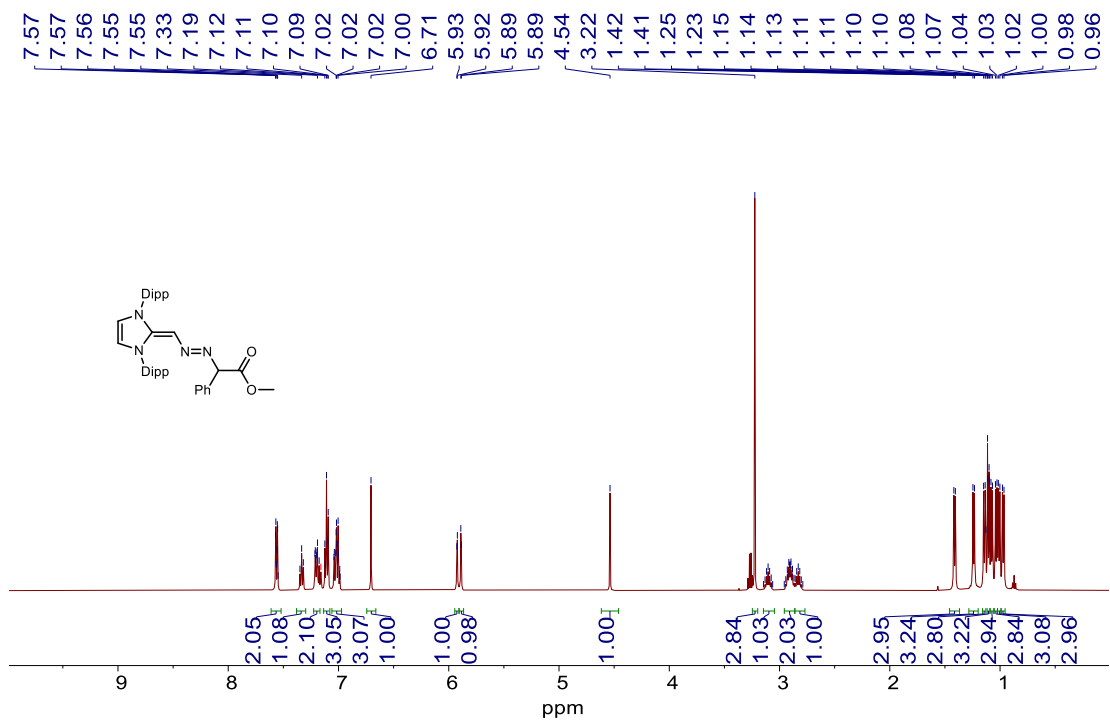

Figure S35.  $^1\text{H}$  NMR (500 MHz,  $\text{C}_6\text{D}_6$ ) spectrum of IV.

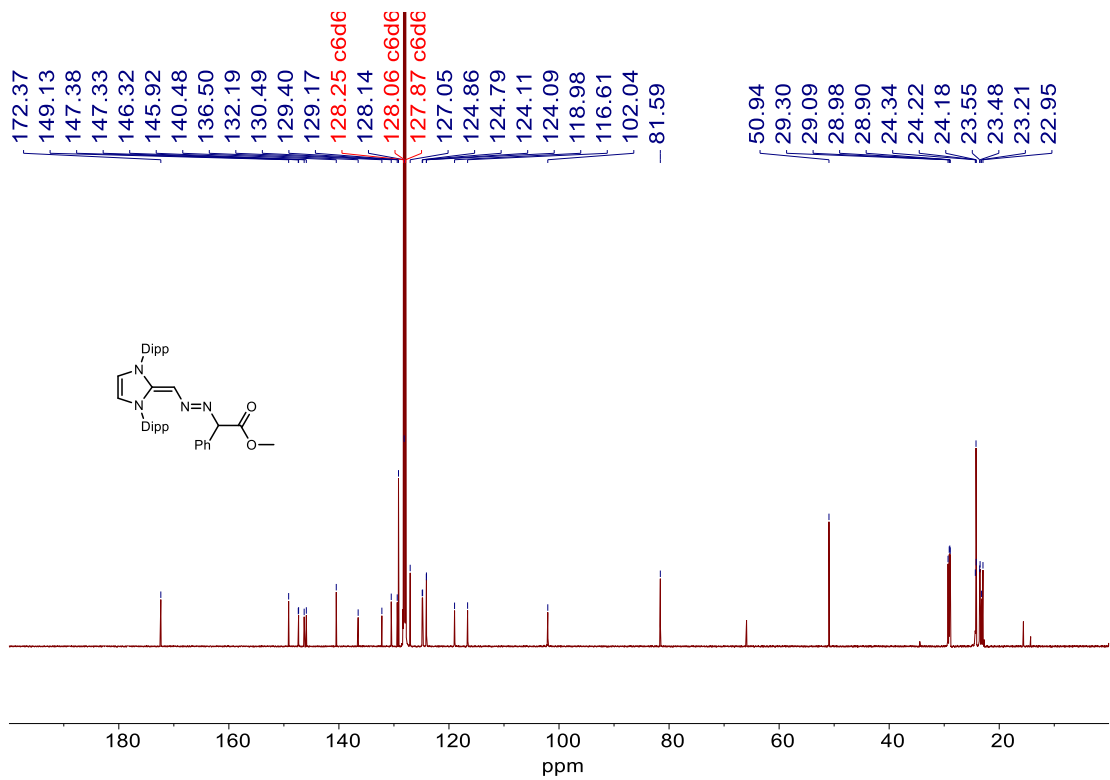

Figure S36.  $^{13}\text{C}$  NMR (126 MHz,  $\text{C}_6\text{D}_6$ ) spectrum of IV.

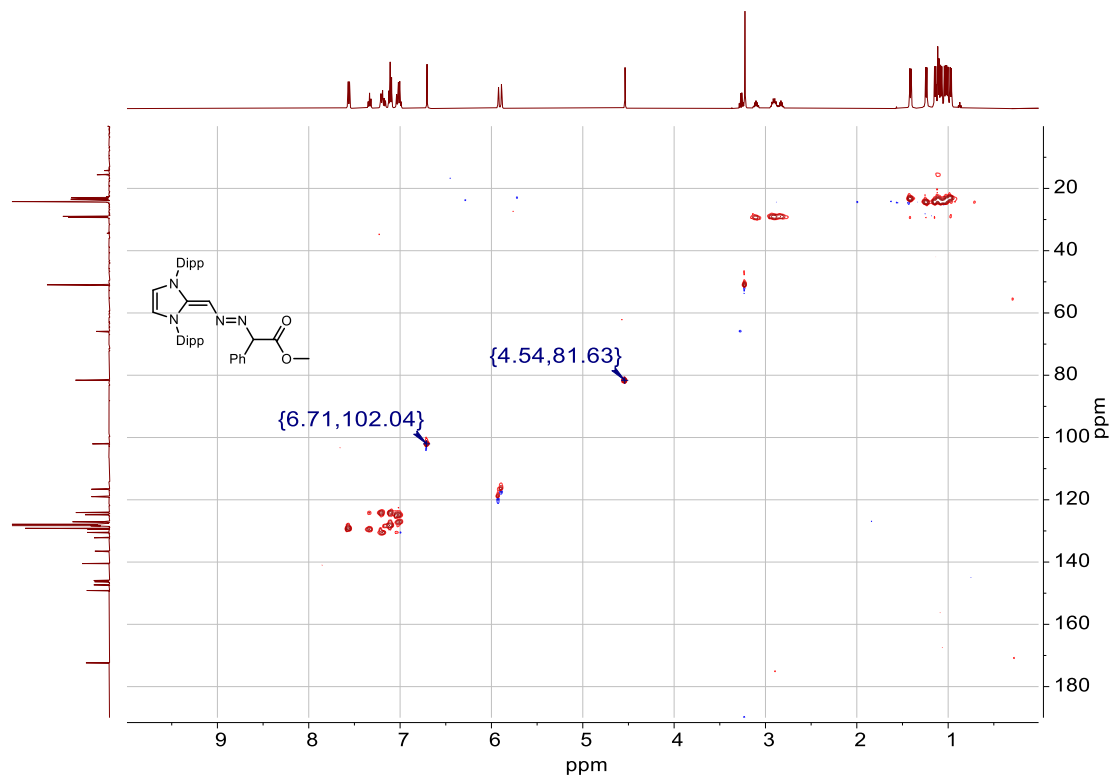

**Figure S37.**  $^1\text{H}$ - $^{13}\text{C}$ -HSQC NMR (400 MHz,  $\text{C}_6\text{D}_6$ ) of IV.

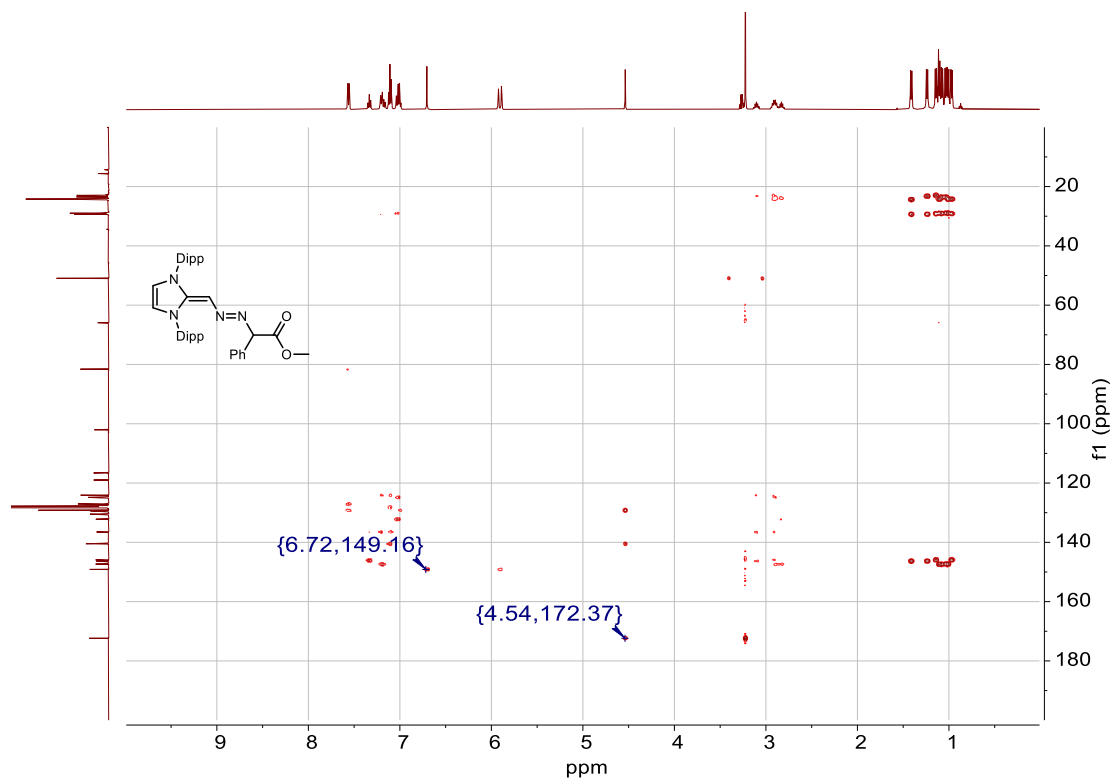

**Figure S38.**  $^1\text{H}$ - $^{13}\text{C}$ -HMBC NMR (400 MHz,  $\text{C}_6\text{D}_6$ ) of IV.

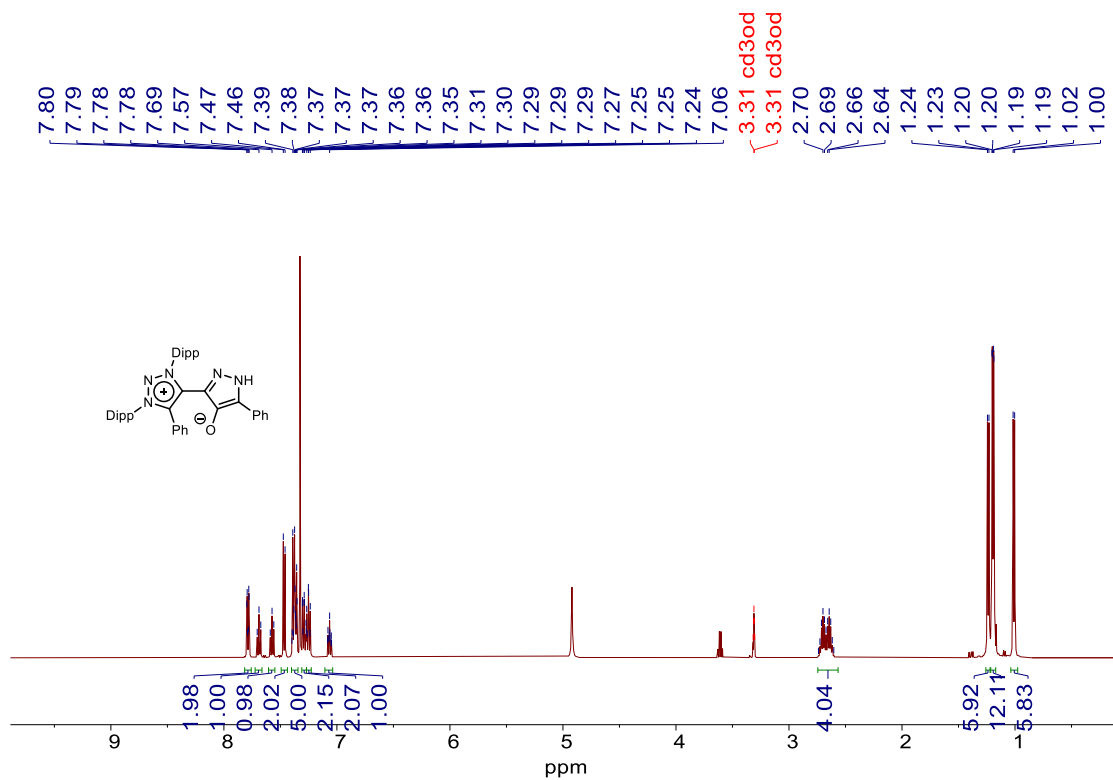

Figure S39. <sup>1</sup>H NMR (500 MHz, CD<sub>3</sub>OD) spectrum of 10.

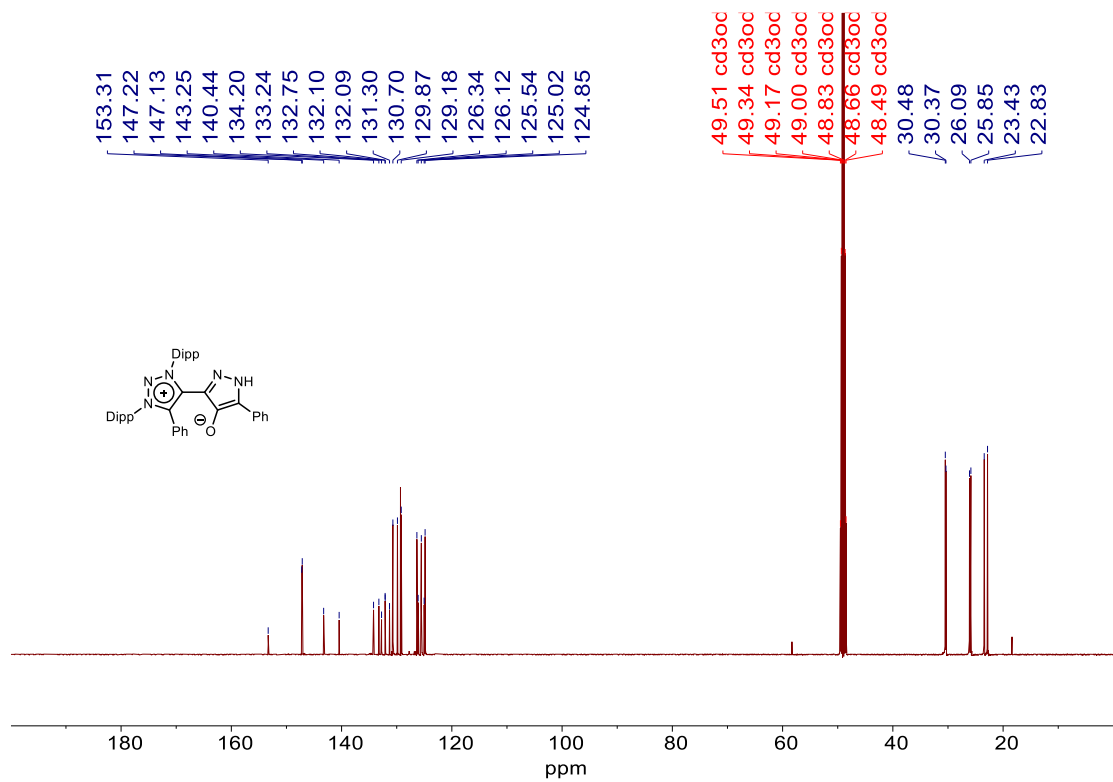

Figure S40. <sup>13</sup>C NMR (126 MHz, CD<sub>3</sub>OD) spectrum of 10.

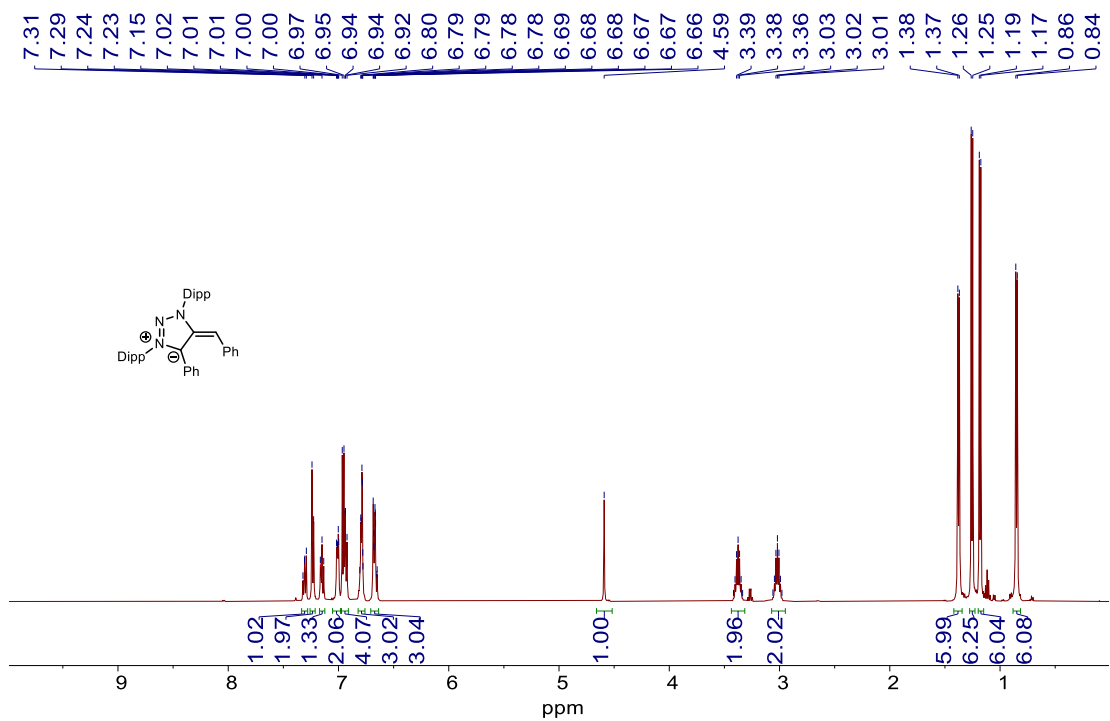

Figure S41.  $^1\text{H}$  NMR (500 MHz,  $\text{C}_6\text{D}_6$ ) spectrum of 11.

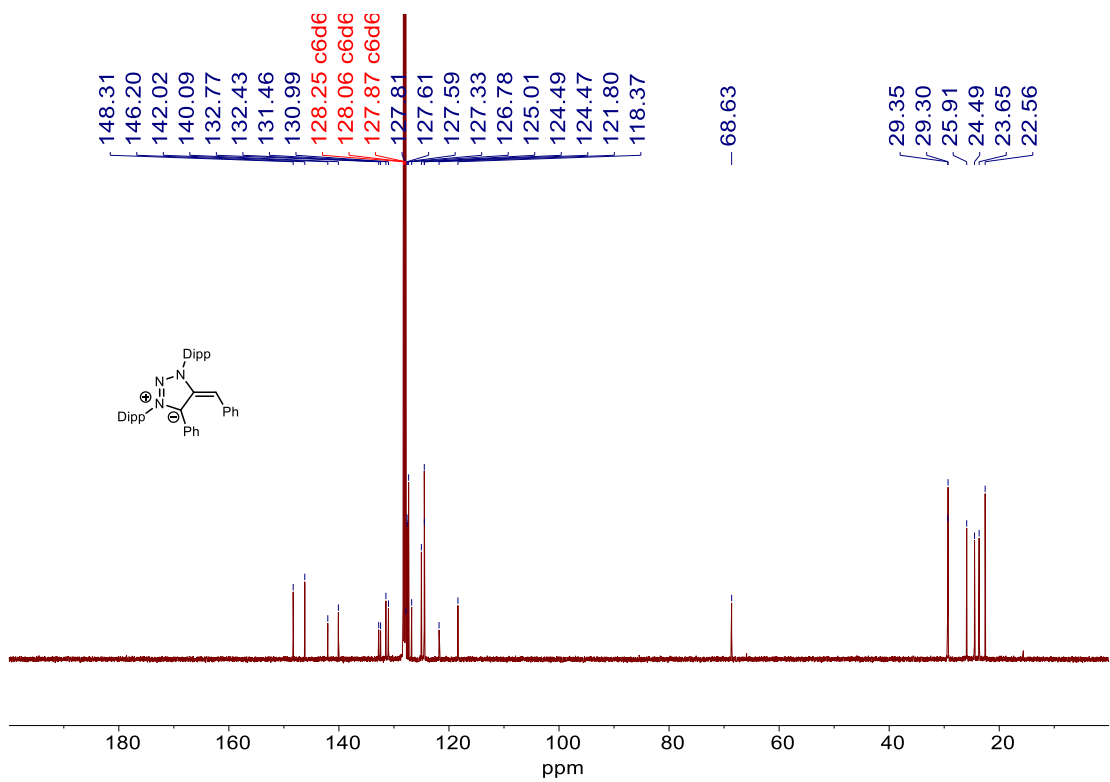

Figure S42.  $^{13}\text{C}$  NMR (126 MHz,  $\text{C}_6\text{D}_6$ ) spectrum of 11.

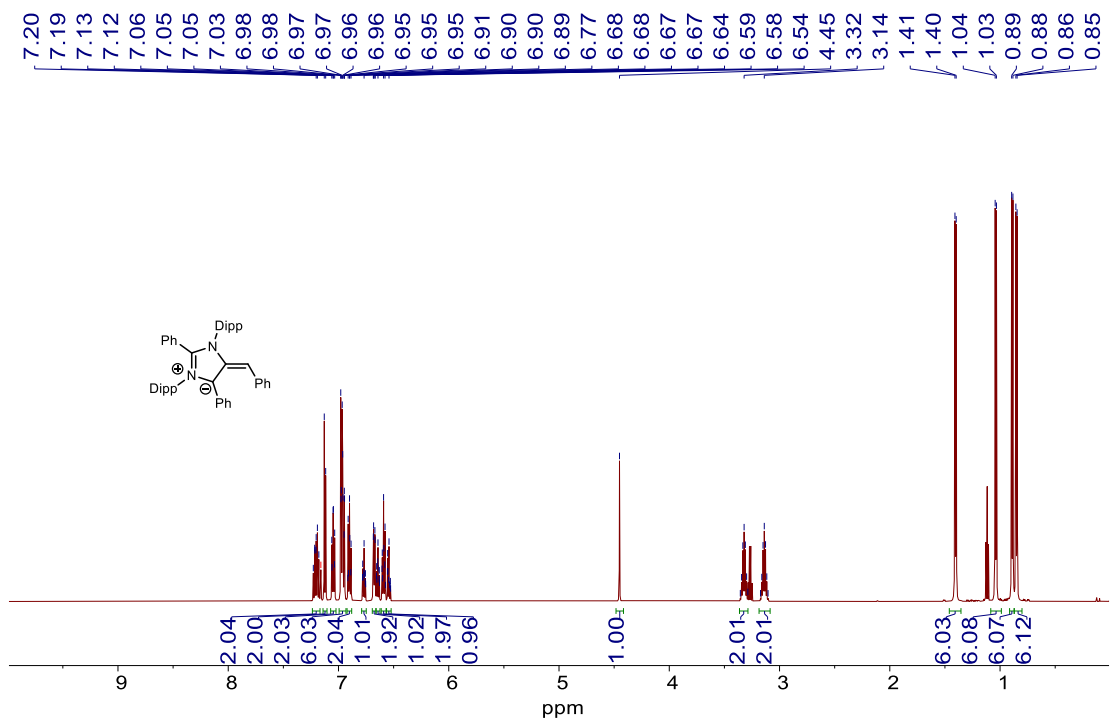

Figure S43.  $^1\text{H}$  NMR (600 MHz,  $\text{C}_6\text{D}_6$ ) spectrum of VI.

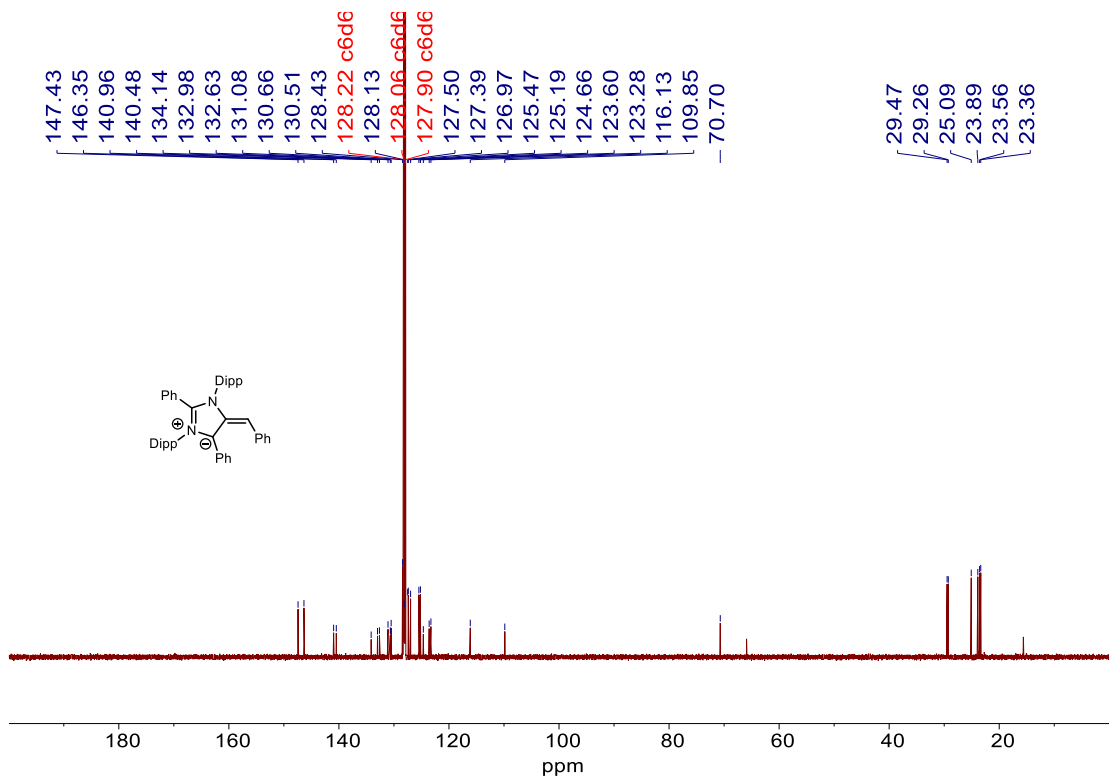

Figure S44.  $^{13}\text{C}$  NMR (151 MHz,  $\text{C}_6\text{D}_6$ ) spectrum of VI.

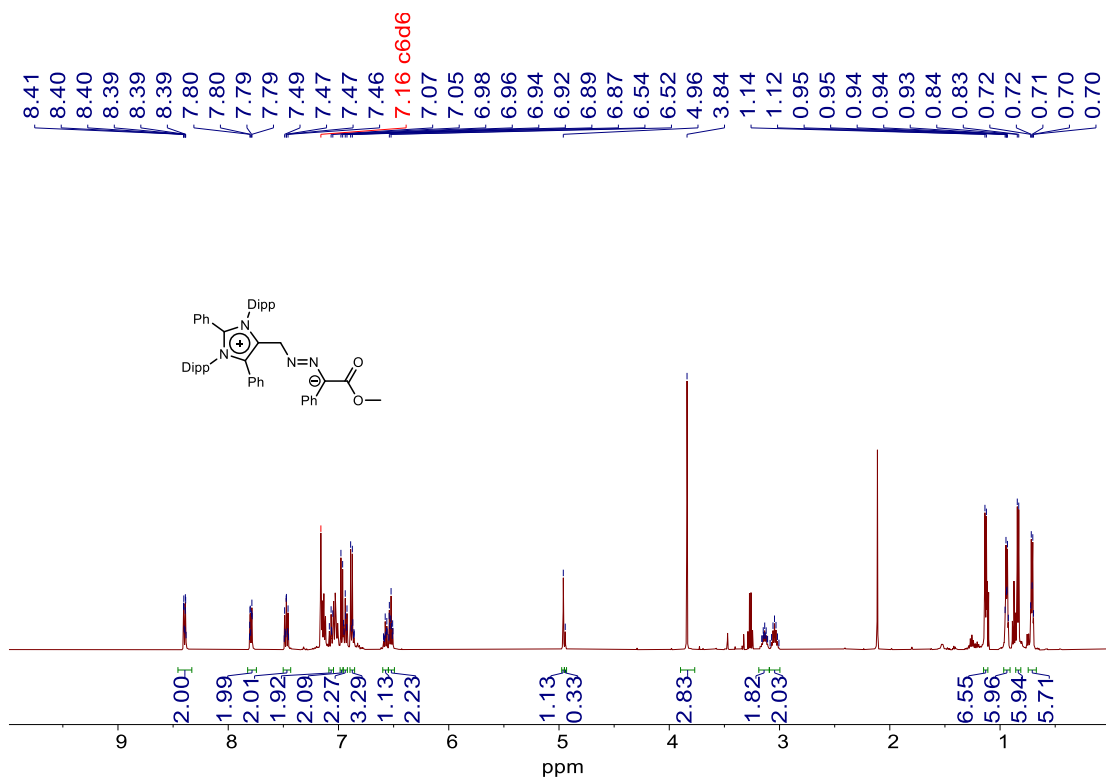

**Figure S45.** <sup>1</sup>H NMR (500 MHz, C<sub>6</sub>D<sub>6</sub>) spectrum of VII.

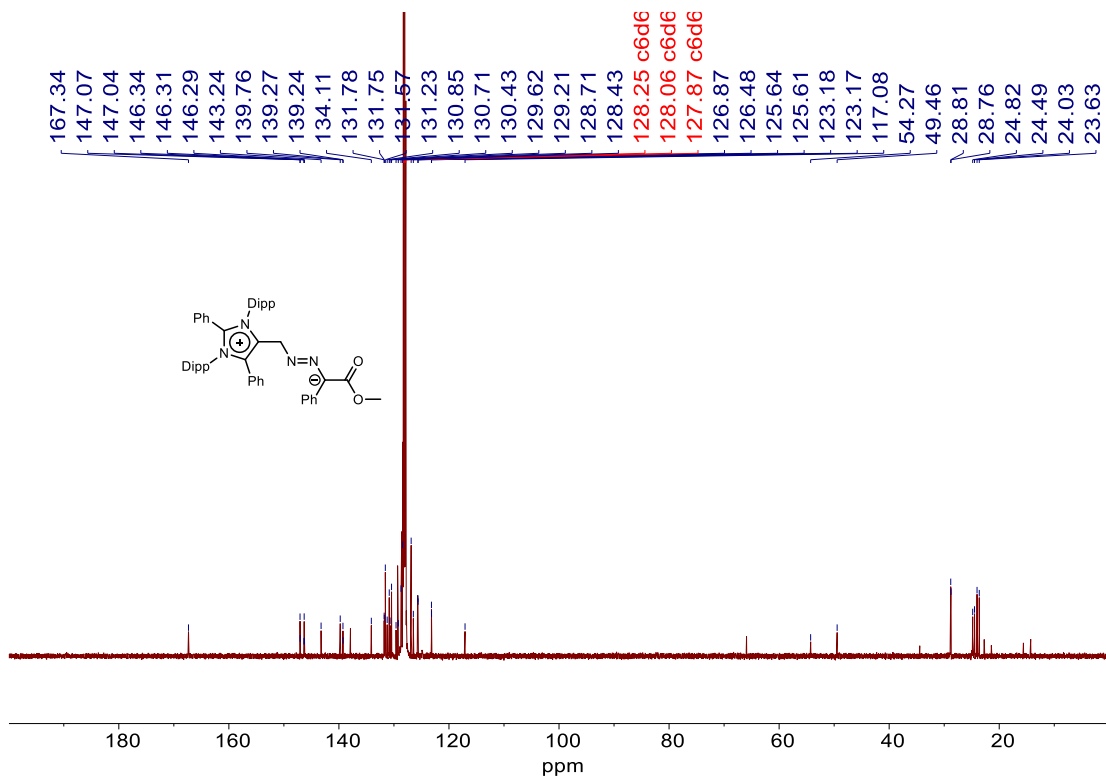

**Figure S46.** <sup>13</sup>C NMR (126 MHz, C<sub>6</sub>D<sub>6</sub>) spectrum of VII.

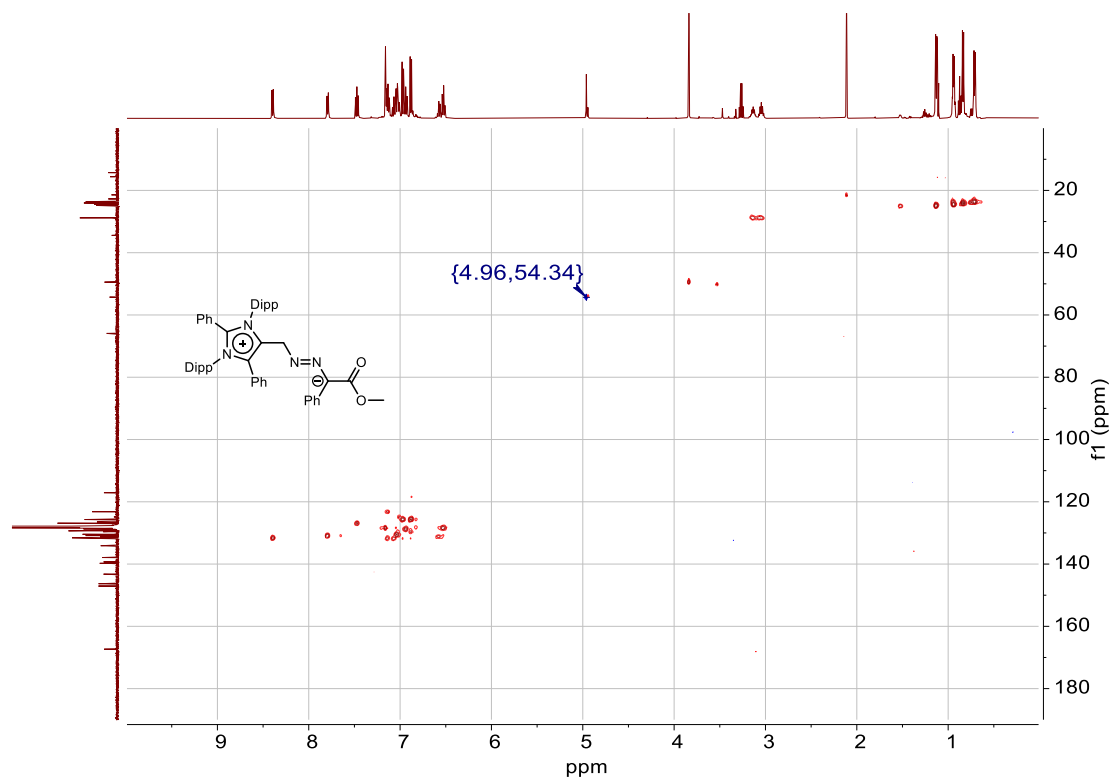

Figure S47.  $^1\text{H}$ - $^{13}\text{C}$ -HSQC NMR (500 MHz,  $\text{C}_6\text{D}_6$ ) of VII.

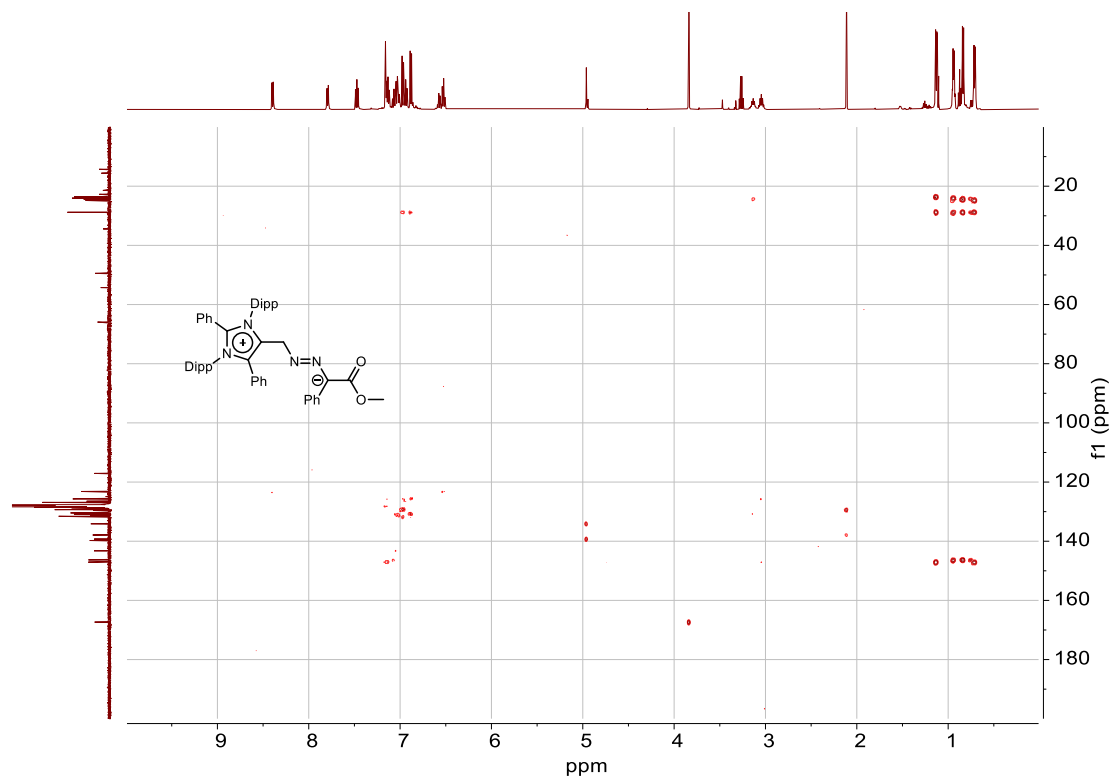

Figure S48.  $^1\text{H}$ - $^{13}\text{C}$ -HMBC NMR (500 MHz,  $\text{C}_6\text{D}_6$ ) of VII.

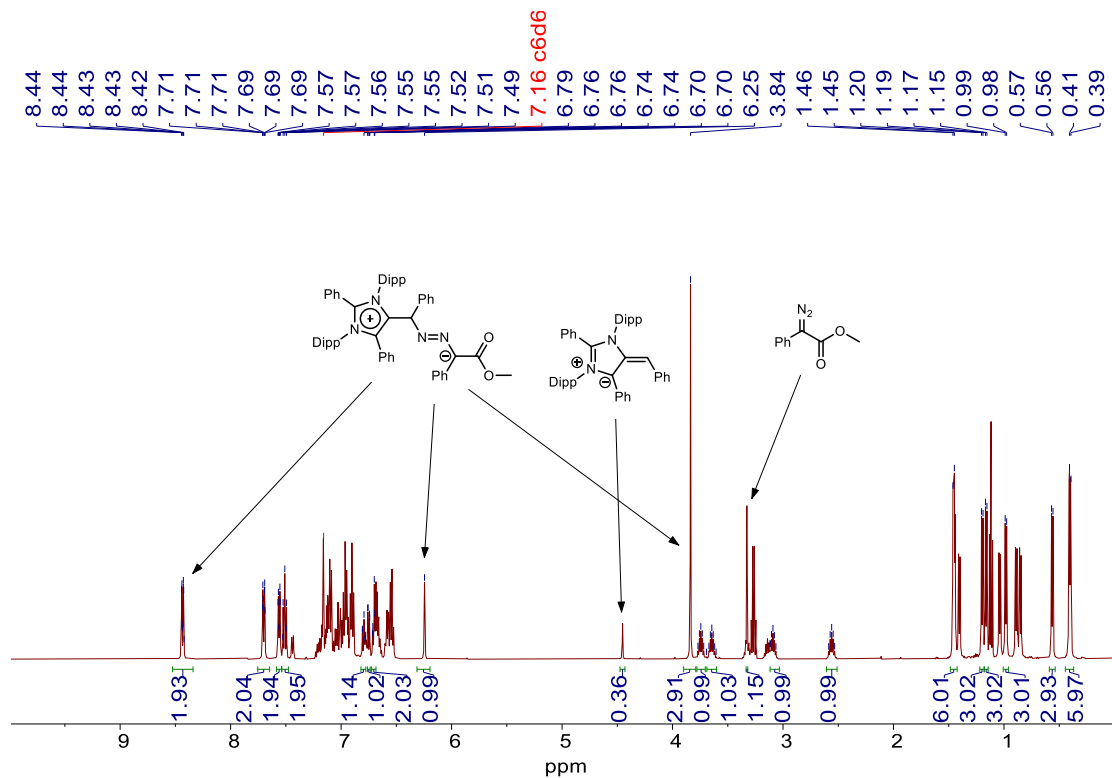

**Figure S49.**  $^1\text{H}$  NMR (500 MHz,  $\text{C}_6\text{D}_6$ ) spectrum of **VIII** (significant dissociation into **1a** and **VI** is evident).

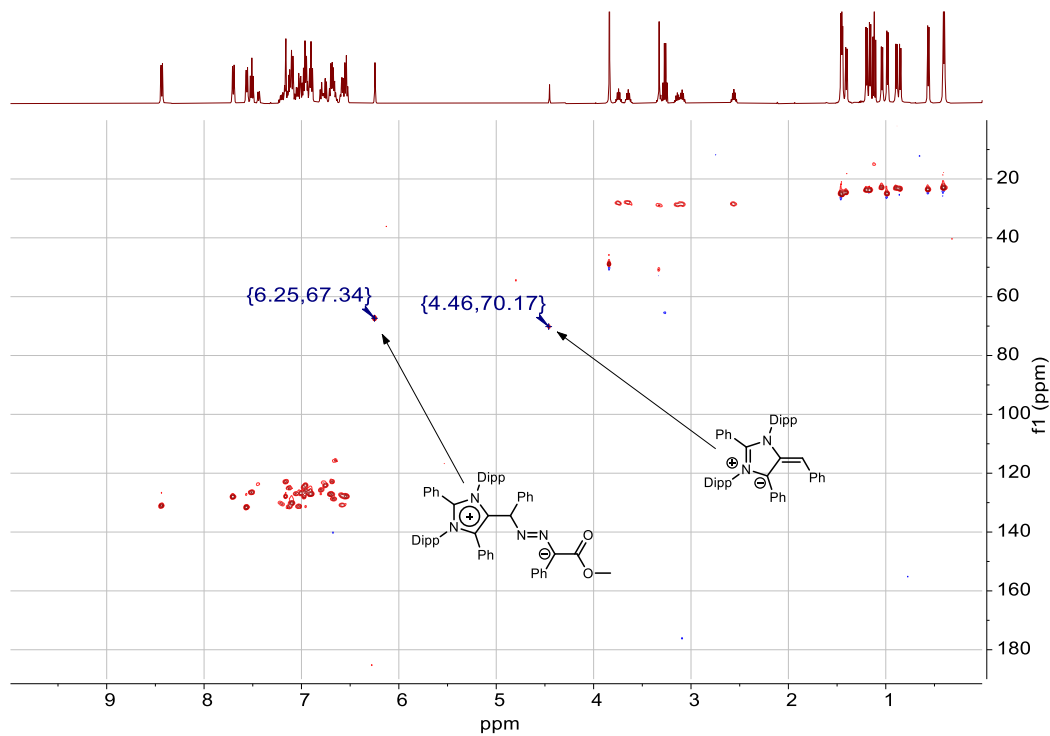

**Figure S50.**  $^1\text{H}$ - $^{13}\text{C}$ -HSQC NMR (500 MHz,  $\text{C}_6\text{D}_6$ ) of **VIII** (significant dissociation into **1a** and **VI** is evident).



### 3. NMR spectra of reaction between **1a** and **2a** at low temperature

A THF-*d*<sub>8</sub> solution of **2a** (400. μL, 48.0 mM of **2a** with 53.3 mM of SiEt<sub>4</sub>) was transferred to an NMR tube. The NMR tube was then sealed with a septum, immersed into a dry ice/isopropanol bath (−78 °C). To the sample was added a THF-*d*<sub>8</sub> solution of **1a** (602 mM, 32.0 μL). The sample was then inserted into the probe of a 600 MHz NMR spectrometer, which was pre-cooled to −40 °C and calibrated. <sup>1</sup>H NMR and <sup>1</sup>H-<sup>13</sup>C-HSQC spectra were recorded at −40 °C. The formation of mNHO-diazo ester adduct **4** was observed.

<sup>1</sup>H NMR (600 MHz, THF-*d*<sub>8</sub>) δ 8.39 (s, 1H, triazolium-*H*), 7.95 (d, *J* = 8.0 Hz, 2H), 7.57 (d, *J* = 7.8 Hz, 2H), 7.33 (t, *J* = 7.5 Hz, 2H), 7.24 (t, *J* = 7.3 Hz, 1H), 7.12 (s, 1H, Mes-*H*), 7.07 (s, 1H, Mes-*H*), 6.94 (t, *J* = 7.6 Hz, 2H), 6.70 (t, *J* = 7.3 Hz, 1H), 6.47 (s, 1H, CH), 4.42 (s, 3H, N-CH<sub>3</sub>), 3.38 (s, 3H, COOCH<sub>3</sub>), 2.35 (s, 3H, Mes-CH<sub>3</sub>), 1.99 (s, 3H, Mes-CH<sub>3</sub>), 1.83 (s, 3H, Mes-CH<sub>3</sub>), 1.74 (s, 3H, Mes-CH<sub>3</sub>).

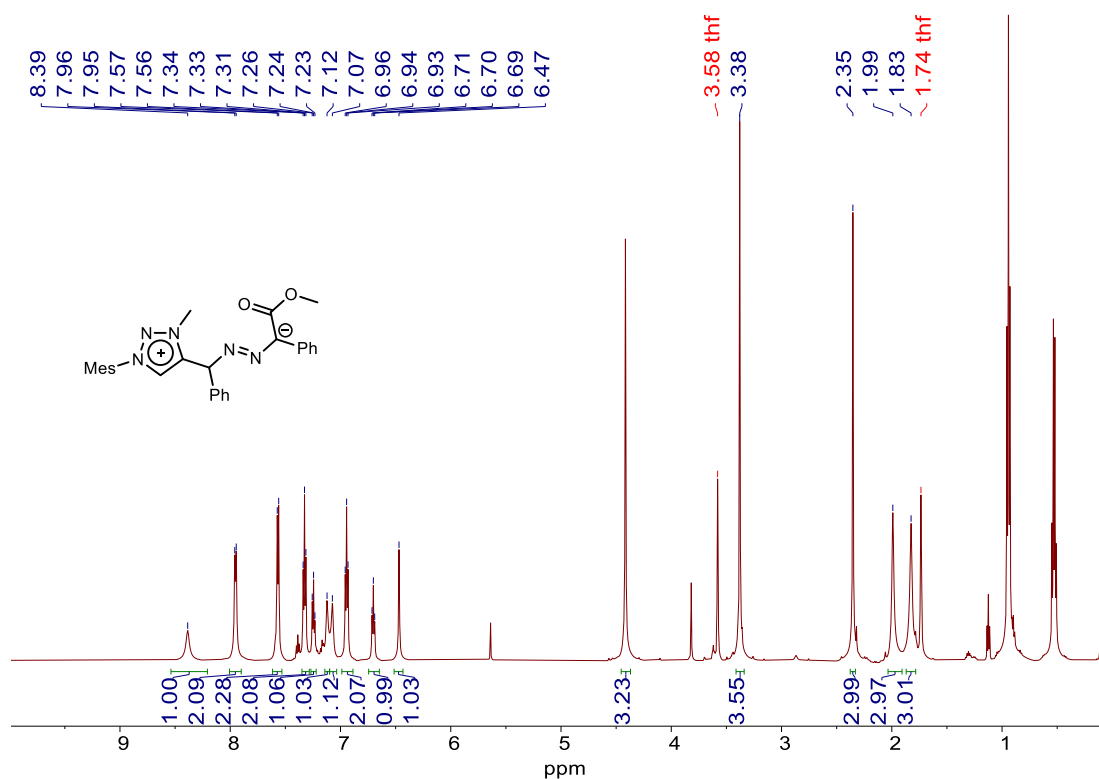

**Figure S51.** <sup>1</sup>H NMR (600 MHz, THF-*d*<sub>8</sub>) of the reaction mixture of **1a** and **2a** in THF-*d*<sub>8</sub> at −40 °C.

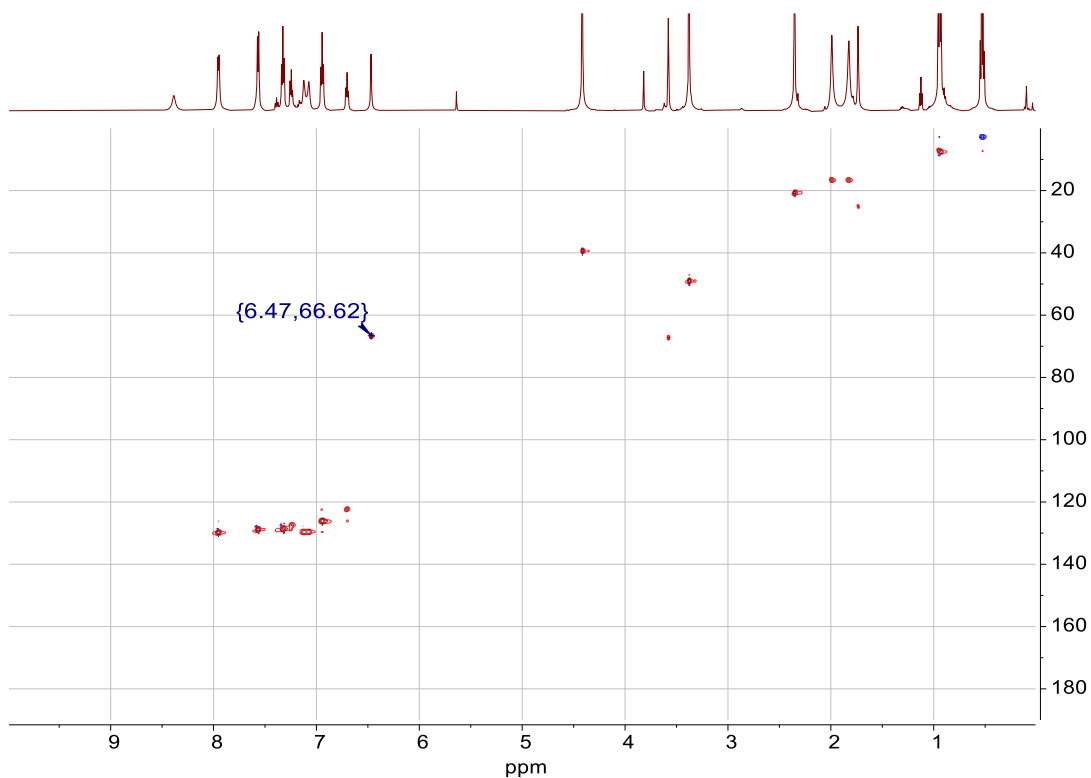

**Figure S52.** <sup>1</sup>H-<sup>13</sup>C-HSQC NMR (600 MHz, THF-*d*<sub>8</sub>) of the reaction mixture of **1a** and **2a** in THF-*d*<sub>8</sub> at −40 °C.

### Reaction Kinetic

A THF-*d*<sub>8</sub> solution of **1a** (400. μL, 48.0 mM of **2a** with 53.3 mM of SiEt<sub>4</sub>) in was transferred to an NMR tube. The NMR tube was then sealed with a septum, immersed into a dry ice/isopropanol bath (−78 °C). To the sample was added a THF-*d*<sub>8</sub> solution of **1a** (602 mM, 32.0 μL). The sample was then inserted into the probe of a 600 MHz NMR spectrometer, which was pre-cooled to −20 °C and calibrated. <sup>1</sup>H NMR spectra were recorded at −20 °C every 9.3 minutes over a 5.6-hour period.

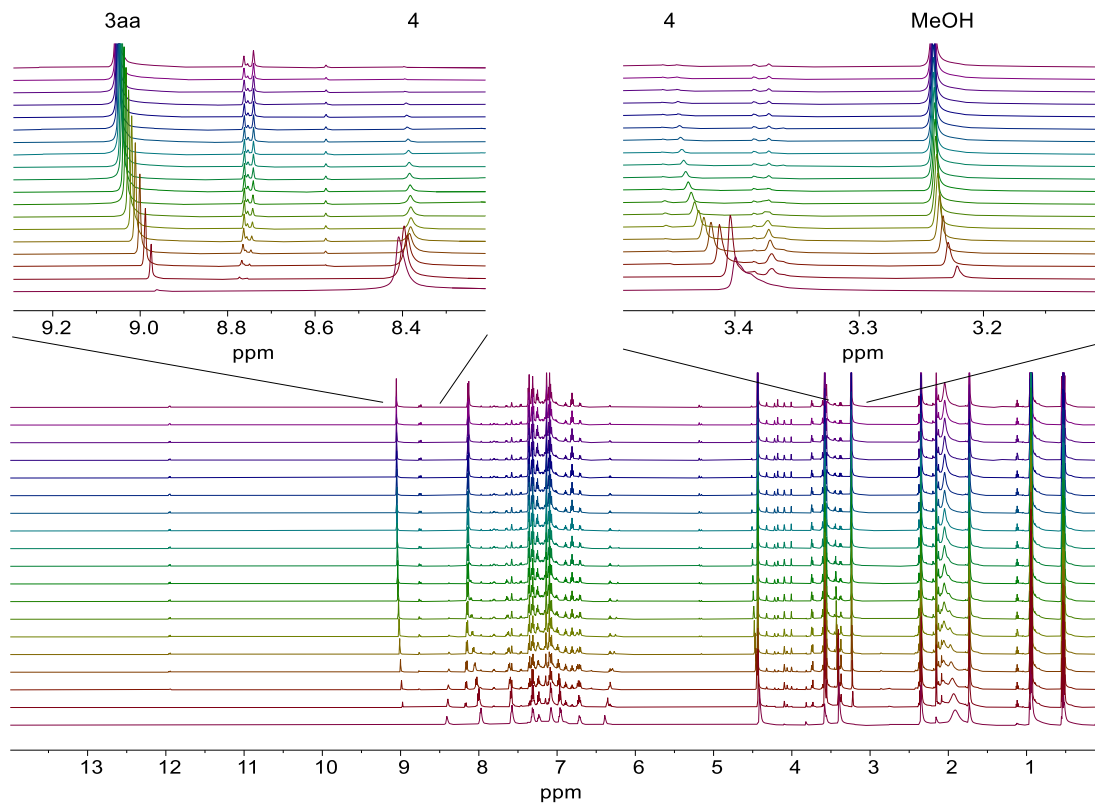

**Figure S53.** Partial  $^1\text{H}$  NMR spectra (600 MHz,  $\text{THF-}d_8$ ) demonstrating the conversion of intermediate **4** to **3aa** and MeOH at  $-20\text{ }^\circ\text{C}$ . Bottom to top:  $t = 2$  min. for the first spectrum, with 18.6 min. intervals.

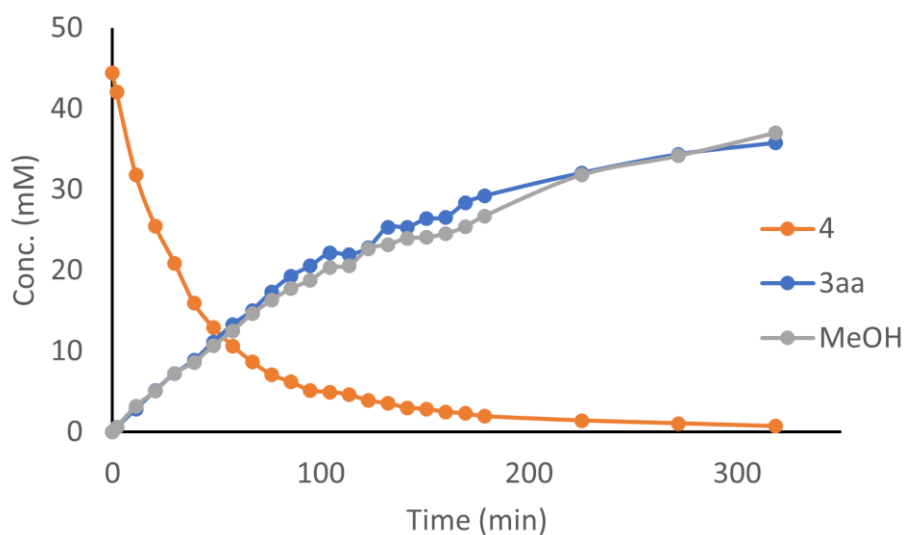

**Figure S54.** Experimentally measured concentrations for **4**  $\rightarrow$  **3aa** + MeOH in at  $-20\text{ }^\circ\text{C}$  ( $\text{SiEt}_4$  was used as the internal standard).

#### 4. X-ray crystallography

The X-ray diffraction data were collected on a Bruker Kappa Apex II / Photon II diffractometer with graphite-monochromated Mo K $\alpha$  radiation ( $\lambda = 0.71073 \text{ \AA}$ ) at 150 K controlled by an Oxford Cryostream 700 series low-temperature system and processed with the Bruker Apex 3 software package.<sup>12</sup> The structures were solved by direct methods and refined using SHELX-2016 software package.<sup>13,14</sup> All non-hydrogen atoms were refined anisotropically except for some of the atoms of the disordered isopropyl group in **10**. All hydrogen atoms bonded to heteroatoms were located and their coordinates were refined, whereas those bonded to carbon atoms were calculated using the riding model. The diffuse residual electron density, Solvent Accessible Volume =  $844 \text{ \AA}^3$ , # Electrons Found in S.A.V. = 309 in the lattice of **3aa**; Solvent Accessible Volume =  $1479 \text{ \AA}^3$ , # Electrons Found in S.A.V. = 328 in the lattice of **10**; Solvent Accessible Volume =  $1848 \text{ \AA}^3$ , # Electrons Found in S.A.V. = 463 in the lattice of **VI**; Solvent Accessible Volume =  $1984 \text{ \AA}^3$ , # Electrons Found in S.A.V. = 516 in the lattice of **VII** were removed with the SQUEEZE function of PLATON<sup>15</sup> and was not included in the formula or the refinement. Selected crystallographic data are summarized in Tables S1–2.

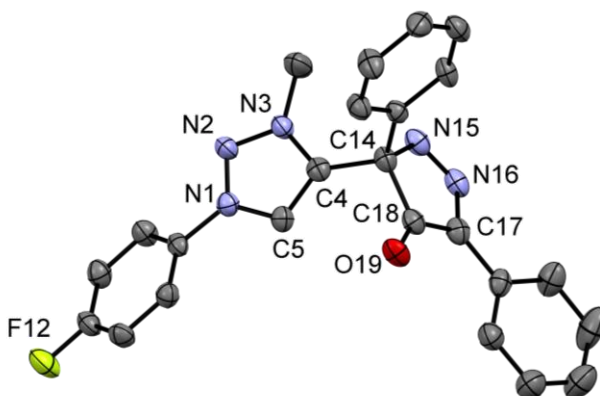

**Figure S55.** Intermolecular hydrogen bond of **3ae**.

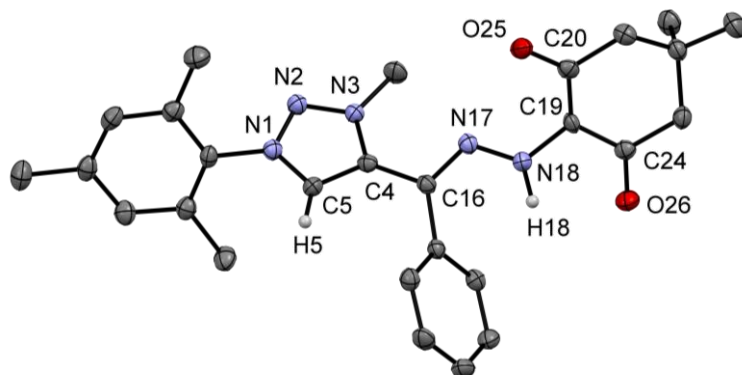

**Figure S56.** X-ray structures of **8** with thermal ellipsoids set to 50% probability level. All hydrogen atoms, except for H5 and H18, are omitted for clarity.

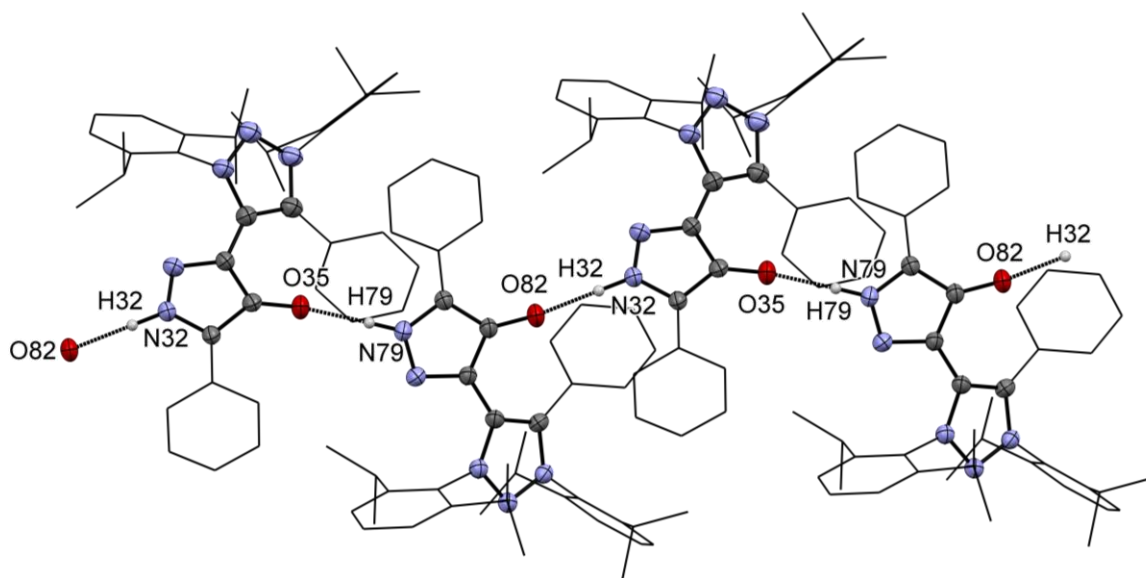

**Figure S57.** Intermolecular hydrogen bond of **10** to form a 1D chain.

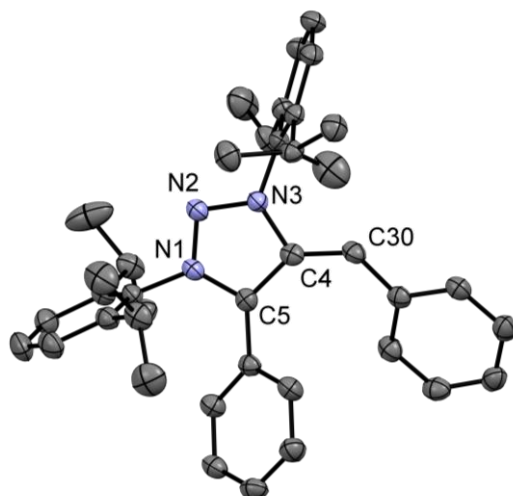

**Figure S58.** X-ray structure of **11**. Thermal ellipsoids are shown at 50% probability. All hydrogen atoms are omitted for clarity.

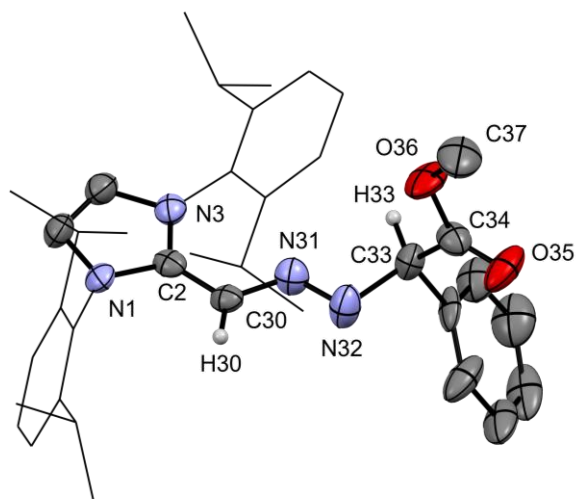

**Figure S59.** X-ray structures of **IV** with thermal ellipsoids shown at 50% probability level. All hydrogen atoms except for H30 and H33 are omitted and the aryl substituents on imidazole are drawn as wireframe for clarity.

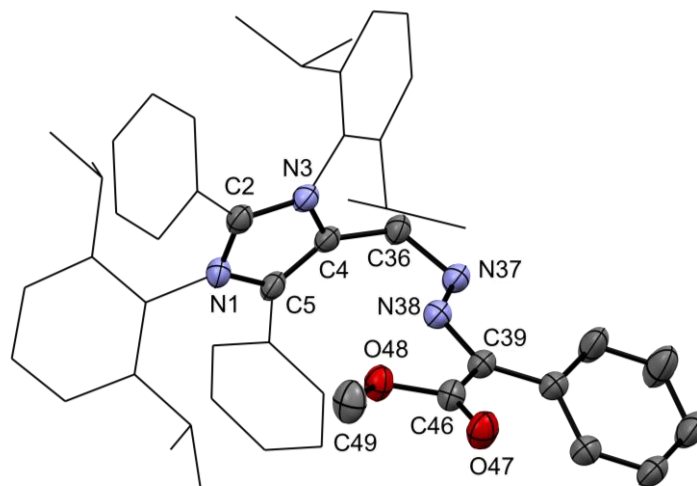

**Figure S60.** X-ray structures of **VII** with thermal ellipsoids shown at 50% probability level. All hydrogen atoms are omitted and the aryl substituents on imidazole are drawn as wireframe for clarity.

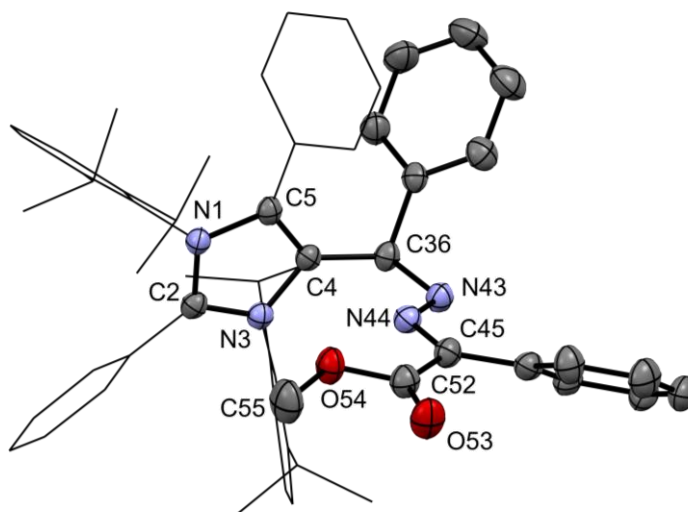

**Figure S61.** X-ray structures of **VIII** with thermal ellipsoids shown at 50% probability level. All hydrogen atoms are omitted and the aryl substituents on imidazole are drawn as wireframe for clarity.

**Table S1.** Selected crystallographic data for compounds **3aa**, **3ae**, **8•0.5C<sub>6</sub>H<sub>6</sub>**, **10**, and **11**.

|                                            | <b>3aa</b>                                       | <b>3ae</b>                                        | <b>8•0.5C<sub>6</sub>H<sub>6</sub></b>                        | <b>10</b>                                        | <b>11</b>                                      |
|--------------------------------------------|--------------------------------------------------|---------------------------------------------------|---------------------------------------------------------------|--------------------------------------------------|------------------------------------------------|
| Empirical formula                          | C <sub>27</sub> H <sub>25</sub> N <sub>5</sub> O | C <sub>24</sub> H <sub>18</sub> N <sub>5</sub> OF | C <sub>30</sub> H <sub>34</sub> N <sub>5</sub> O <sub>2</sub> | C <sub>41</sub> H <sub>45</sub> N <sub>5</sub> O | C <sub>39</sub> H <sub>45</sub> N <sub>3</sub> |
| FW (g·mol <sup>-1</sup> )                  | 435.52                                           | 411.43                                            | 496.62                                                        | 623.82                                           | 555.78                                         |
| Crystal system                             | Orthorhombic                                     | Orthorhombic                                      | Triclinic                                                     | Monoclinic                                       | Monoclinic                                     |
| Space Group                                | Pbcn                                             | P2 <sub>1</sub> 2 <sub>1</sub> 2 <sub>1</sub>     | P-1                                                           | P2 <sub>1</sub> /n                               | P2 <sub>1</sub> /n                             |
| Z                                          | 8                                                | 4                                                 | 2                                                             | 8                                                | 4                                              |
| a (Å)                                      | 26.084(7)                                        | 8.4361(5)                                         | 9.4016(11)                                                    | 12.217(3)                                        | 9.797(3)                                       |
| b (Å)                                      | 17.067(5)                                        | 10.9609(6)                                        | 9.7932(8)                                                     | 22.188(5)                                        | 10.878(3)                                      |
| c (Å)                                      | 11.802(3)                                        | 21.3387(12)                                       | 14.9499(17)                                                   | 29.927(8)                                        | 30.575(8)                                      |
| α (deg)                                    | 90                                               | 90                                                | 100.871(3)                                                    | 90                                               | 90                                             |
| β (deg)                                    | 90                                               | 90                                                | 101.457(3)                                                    | 97.789(9)                                        | 96.548(17)                                     |
| γ (deg)                                    | 90                                               | 90                                                | 92.165(3)                                                     | 90                                               | 90                                             |
| V (Å <sup>3</sup> )                        | 5254(3)                                          | 1973.13(19)                                       | 1320.8(2)                                                     | 8037(3)                                          | 3237.5(15)                                     |
| D <sub>calcd</sub> , (g·cm <sup>-3</sup> ) | 1.101                                            | 1.385                                             | 1.249                                                         | 1.031                                            | 1.140                                          |
| μ (mm <sup>-1</sup> )                      | 0.070                                            | 0.095                                             | 0.080                                                         | 0.063                                            | 0.066                                          |
| F(000)                                     | 1840                                             | 856                                               | 530                                                           | 2672                                             | 1200                                           |
| no. of obsd reflns                         | 3854                                             | 3245                                              | 3989                                                          | 10429                                            | 4328                                           |
| no. of params refnd                        | 307                                              | 286                                               | 349                                                           | 869                                              | 397                                            |
| goodness of fit                            | 1.031                                            | 1.028                                             | 1.025                                                         | 1.040                                            | 1.039                                          |
| R <sub>1</sub> (I>2σ)                      | 0.0635                                           | 0.0516                                            | 0.0602                                                        | 0.0769                                           | 0.0636                                         |
| wR <sub>2</sub>                            | 0.1826                                           | 0.1195                                            | 0.1408                                                        | 0.2070                                           | 0.1553                                         |



**Table S2.** Selected crystallographic data for compounds **IV**, **VII** and **VIII**.

|                                            | <b>IV</b>                                                     | <b>VII</b>                                                    | <b>VIII</b>                                                   |
|--------------------------------------------|---------------------------------------------------------------|---------------------------------------------------------------|---------------------------------------------------------------|
| Empirical formula                          | C <sub>37</sub> H <sub>46</sub> N <sub>4</sub> O <sub>2</sub> | C <sub>49</sub> H <sub>54</sub> N <sub>4</sub> O <sub>2</sub> | C <sub>55</sub> H <sub>58</sub> N <sub>4</sub> O <sub>2</sub> |
| FW (g·mol <sup>-1</sup> )                  | 578.78                                                        | 730.96                                                        | 807.05                                                        |
| Crystal system                             | Triclinic                                                     | Monoclinic                                                    | Triclinic                                                     |
| Space Group                                | P-1                                                           | P2 <sub>1</sub> /n                                            | P-1                                                           |
| Z                                          | 2                                                             | 4                                                             | 4                                                             |
| a (Å)                                      | 10.384(8)                                                     | 12.713(5)                                                     | 17.399(7)                                                     |
| b (Å)                                      | 75.72(3)                                                      | 27.880(12)                                                    | 18.549(7)                                                     |
| c (Å)                                      | 16.438(12)                                                    | 15.682(7)                                                     | 20.435(7)                                                     |
| α (deg)                                    | 72.09(3)                                                      | 90                                                            | 87.920(11)                                                    |
| β (deg)                                    | 75.72(3)                                                      | 98.665(13)                                                    | 76.584(11)                                                    |
| γ (deg)                                    | 82.68(2)                                                      | 90                                                            | 68.008(10)                                                    |
| V (Å <sup>3</sup> )                        | 1692(2)                                                       | 5495(4)                                                       | 5939(4)                                                       |
| D <sub>calcd</sub> , (g·cm <sup>-3</sup> ) | 1.136                                                         | 0.884                                                         | 0.903                                                         |
| μ (mm <sup>-1</sup> )                      | 0.071                                                         | 0.054                                                         | 0.055                                                         |
| F(000)                                     | 624                                                           | 1568                                                          | 1728                                                          |
| no. of obsd reflns                         | 7844                                                          | 12762                                                         | 27800                                                         |
| no. of params refnd                        | 463                                                           | 506                                                           | 1117                                                          |
| goodness of fit                            | 0.995                                                         | 1.050                                                         | 1.059                                                         |
| R <sub>1</sub> (I>2σ)                      | 0.1143                                                        | 0.0777                                                        | 0.0609                                                        |
| wR <sub>2</sub>                            | 0.3231                                                        | 0.1967                                                        | 0.1544                                                        |

## 5. Computation

All DFT calculations are performed with the TURBOMOLE 7.4 suite of programs.<sup>16</sup> The structures are fully optimized at the TPSS-D3/def2-TZVP + COSMO(THF) level, which combines the TPSS meta-GGA density functional<sup>17</sup> with the BJ-damped DFT-D3 dispersion correction<sup>18</sup> and the def2-TZVP basis set,<sup>19</sup> using the Conductor-like Screening Model (COSMO)<sup>20</sup> for THF solvent (dielectric constant  $\epsilon = 7.58$  and diameter  $R_{\text{solv}} = 3.18 \text{ \AA}$ ). The well-established density-fitting RI-J approach<sup>21</sup> is used, which speeds up semi-local DFT functional calculations by a factor of 5-20 at practically no loss of accuracy. Chemically reasonable reaction paths are generated manually and tested in DFT calculations. Useful initial guesses of transition structures are obtained from interpolation between optimized intermediate structures as well as constrained optimizations with appropriate reaction coordinates. The optimized structures are characterized by frequency analysis (no imaginary frequency for true minima and only one imaginary frequency for transition states) to provide thermal free-energy corrections (at 298.15 K and 1 atm) according to the modified ideal gas-rigid rotor-harmonic oscillator model.<sup>22</sup> The connection of the transition state with reactants and products is checked visually by careful examining the vibrational transition mode.

More accurate solvation free energies in THF solution are computed with the COSMO-RS model<sup>23</sup> (parameter file: BP\_TZVP\_16.ctd) using the COSMOtherm package<sup>24</sup> based on the TPSS-D3 optimized structures, corrected by +1.89 kcal/mol to account for the 1 mol/L reference concentration in solution. To check the effects of the chosen density functional on the reaction energies and barriers, single-point calculations at both TPSS-D3<sup>17</sup> and hybrid-meta-GGA PW6B95-D3<sup>25</sup> levels are performed using the large def2-QZVP<sup>19</sup> basis set. Final reaction free energies ( $\Delta G$ ) are determined from the electronic single-point energies plus TPSS-D3 thermal corrections and COSMO-RS solvation free energies. Both DFT functionals are in good mutual agreement of  $0.1 \pm 2.9$  (average  $\pm$  standard deviation) kcal/mol with the

meta-GGA TPSS-D3 functional tends to predict  $2.1 \pm 2.9$  kcal/mol too lower reaction barriers, as also observed in our recent DFT studies.<sup>26</sup> In the discussion, more reliable PW6B95-D3 + COSMO-RS free energies (in kcal/mol, at 298.15 K and 1 mol/L concentration) are used unless specified otherwise. The applied DFT methods in combination with the large AO basis sets provide usually accurate electronic energies with typical absolute errors of 1-2 kcal/mol for chemical energies (including barriers), which has been tested thoroughly for the huge data base GMTKN55<sup>27</sup> that is the common standard in the field of DFT benchmarking. To help NMR assignment, nuclear magnetic shielding constants are also computed using the GIAO (Gauge Including Atomic Orbital) method<sup>28</sup> at the TPSS/def2-QZVP level; final <sup>13</sup>C-NMR chemical shifts are computed using the experimental NMR signal of the compound **3aa** observed at 188.6 ppm in THF as reference.

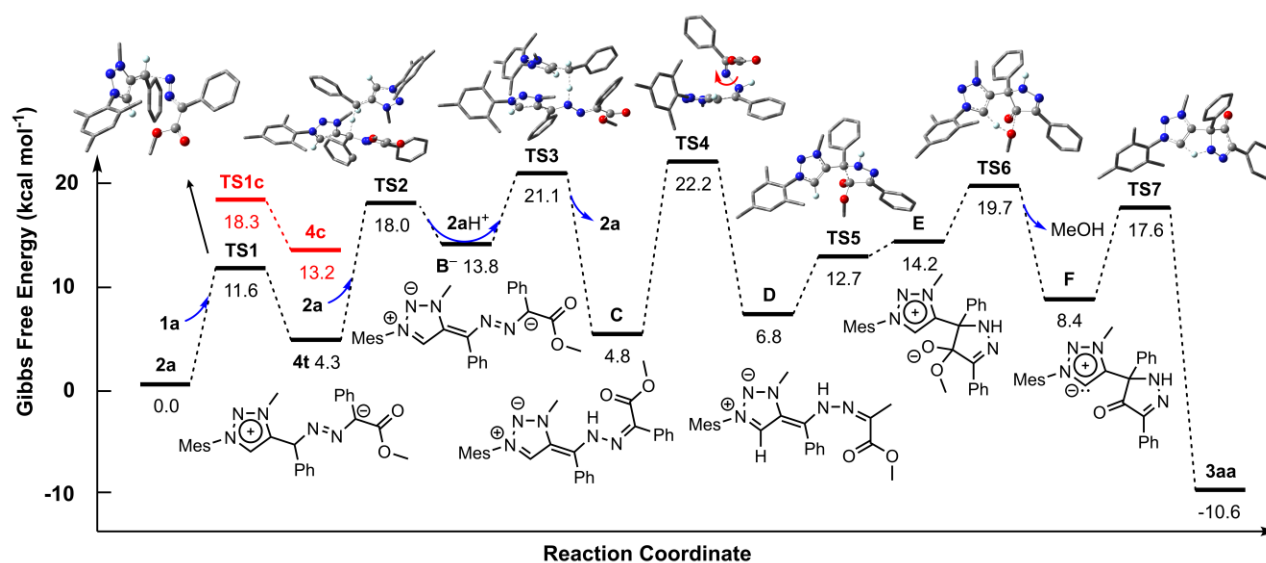

**Figure S62.** DFT computed free energy profile (in kcal mol<sup>-1</sup>, at 298 K and 1 M concentration) for the reaction of **1a** and **2a** at the PW6B95-D3/def2-QZVP + COSMO-RS level using TPSS-D3/def2-TZVP + COSMO optimized geometries in THF solution.

**Table S3.** Computed intermediates and transition states.

|                        |            |            |                      |
|------------------------|------------|------------|----------------------|
| <b>TS1</b>             | <b>4t</b>  | <b>TS2</b> | <b>B<sup>-</sup></b> |
|                        |            |            |                      |
| <b>2aH<sup>+</sup></b> | <b>TS3</b> | <b>C</b>   | <b>TS4</b>           |
|                        |            |            |                      |
| <b>D</b>               | <b>TS5</b> | <b>E</b>   | <b>TS6</b>           |
|                        |            |            |                      |
| <b>F</b>               | <b>TS7</b> |            |                      |
|                        |            |            |                      |

**Computed Mechanism:** As shown in Figure S62, the nucleophilic addition of the ylidic carbon of **2a** to the terminal nitrogen of **1a** leads to the selective formation of the meta-stable, zwitterionic adduct **4** in the *trans*-configuration (i.e., labelled as **4t**) with respect to the N–N double bond. This process is endergonic by 4.3 kcal mol<sup>-1</sup> via a low-lying transition state **TS1** (11.6 kcal mol<sup>-1</sup>). The formation of the *cis*-adduct **4c** via **TS1c** (color-coded in red) is both kinetically and thermodynamically disfavored. The zwitterionic intermediate **4t** can undergo a **2a**-catalyzed proton transfer from the benzylic position to the adjacent diazo site to form intermediate **C**, which is 0.5 kcal mol<sup>-1</sup> less stable than **4t**. Such a proton transfer process involves the deprotonation of **4t** by **2a** to form **2aH<sup>+</sup>** and **B<sup>-</sup>** (13.8 kcal mol<sup>-1</sup>) via **TS2** (18.0 kcal mol<sup>-1</sup>) followed by the protonation of **B<sup>-</sup>** by **2aH<sup>+</sup>** via **TS3** (21.1 kcal mol<sup>-1</sup>) to form **C** (4.8 kcal mol<sup>-1</sup>). The related *N*-protonation of **B<sup>-</sup>** at the other N-site of the diazo moiety to form the adduct **Cn** is 2.5 kcal/mol less favorable in free energy. The proton migration reduces the bond order of the diazo group, enabling the N–N rotation of intermediate **C** via **TS4** (22.2 kcal mol<sup>-1</sup>) to afford **D** (6.8 kcal mol<sup>-1</sup>), where the ylidic carbon and the carbonyl carbon are already in close contact with each other (i.e., 2.65 Å apart). The subsequent bond formation between the aforementioned two carbon atoms via **TS5** (12.7 kcal mol<sup>-1</sup>) closes the new five-membered ring to form **E** (14.2 kcal mol<sup>-1</sup>), which then eliminates MeOH via **TS6** (19.7 kcal mol<sup>-1</sup>) to give a free carbene **F** (8.4 kcal mol<sup>-1</sup>) and MeOH. The final intramolecular proton transfer from the N–H bond to the highly basic carbene site within **F** via **TS7** (17.6 kcal mol<sup>-1</sup>) affords the product **3aa**. Consistent with the variable temperature experiments, all intermediates after **4t** are higher in free energy than **4t** and thus are not observed. The transition state, **TS4**, for the conversion of **C** into **D** through N–N rotation is the rate-limiting transition state of the overall reaction sequence due to the existence of a partial N–N  $\pi$ -bond, evidenced by the 1.31 Å bond length, comparable to that in compound **8** (1.331(3) Å). When the electron-deficient diazo compound **7** instead of **1a** is reacted with the mNHO **2a**, similar *N*-protonation of the **B<sup>-</sup>**-like anion can be expected but now with reversed regioselectivity, leading to the **Cn**-like product **8** that is indeed exergonic by 5.3 kcal mol<sup>-1</sup> (i.e., isolable experimentally). The formation of the **C**-like **8a** is now endergonic by 3.1 kcal mol<sup>-1</sup> and thus is thermodynamically disfavored.

**Table S4.** DFT computed energies for the reaction of mNHO **2a** and diazo **1a** in THF solution.

TPSS-D3/def2-TZVP + COSMO computed imaginary frequency (ImF), zero-point energies (ZPE), enthalpic (Hc) and Gibbs free-energy (Gc) corrections; the COSMO-RS computed solvation enthalpic (Hsol) and Gibbs free-energy (Gsol) corrections in THF; TPSS-D3/def2-QZVP and PW6B95-D3/def2-QZVP single-point energies (TPSS-D3 and PW6B95 ( $E_p$ )); total PW6B95-D3 Gibbs free energies ( $G_p = E_p + G_c + G_{sol}$ ), relative electronic energies ( $\Delta E_T$  and  $\Delta E_p$ ) and final Gibbs free-energies ( $\Delta G_T$  and  $\Delta G_p$ ) at the TPSS-D3 and PW6B95-D3 levels. Each structure is labeled either by its molecular formula or a specific name, with singly charged cation and anion species indicated by the + and – superscripts, respectively. Transition structures (with only one imaginary frequency) are indicated by the "TS" prefix. See also **Figure S62** for structural labelings. **The final PW6B95-D3 Gibbs free energies are used in our discussion.**

| Reactions                                                                                                                            | ImF              | ZPE    | Hc     | Gc     | Hsol    | Gsol    | TPSS-D3     | PW6B95      | $G_p$       | $\Delta E_T$ | $\Delta E_p$ | $\Delta G_p$ | $\Delta G_T$ |
|--------------------------------------------------------------------------------------------------------------------------------------|------------------|--------|--------|--------|---------|---------|-------------|-------------|-------------|--------------|--------------|--------------|--------------|
|                                                                                                                                      |                  | kcal   | kcal   | kcal   | kcal    | kcal    |             |             |             | kcal         | kcal         | kcal         | kcal         |
| (1 mol/L in THF)                                                                                                                     | cm <sup>-1</sup> | /mol   | /mol   | /mol   | /mol    | /mol    | $E_h$       | $E_h$       | $E_h$       | /mol         | /mol         | /mol         | /mol         |
| <i>Diazo with C=O tans to NN is 0.9 kcal/mol more stable than C=O cis to NN</i>                                                      |                  |        |        |        |         |         |             |             |             |              |              |              |              |
| Diazo <b>1a</b>                                                                                                                      | 0                | 97.73  | 105.51 | 74.58  | -13.64  | -9.27   | -608.08674  | -608.71879  | -608.61170  | 0.00         | 0.00         | 0.00         | 0.00         |
| diazo_cis                                                                                                                            | 0                | 97.53  | 105.41 | 74.20  | -14.10  | -9.67   | -608.08308  | -608.71607  | -608.61022  | 2.30         | 1.71         | 0.93         | 1.52         |
| <i>Nucleophilic addition of mNHO (2a) to terminal N of diazo (1a) is 4.3 kcal/mol endergonic to form meta-stable trans-adduct 4t</i> |                  |        |        |        |         |         |             |             |             |              |              |              |              |
| <b>1a</b> + <b>2a</b>                                                                                                                | 0                | 320.66 | 341.58 | 269.11 | -41.48  | -29.42  | -1509.55026 | -1511.14686 | -1510.75886 | 0.00         | 0.00         | 0.00         | 0.00         |
| <b>3aa</b> + CH <sub>3</sub> OH                                                                                                      | 0                | 320.02 | 341.54 | 271.31 | -56.49  | -38.29  | -1509.55103 | -1511.15310 | -1510.77574 | -0.49        | -3.92        | -10.59       | -7.16        |
| <b>3aaH</b> <sup>+</sup> + CH <sub>3</sub> O <sup>-</sup>                                                                            | 0                | 319.59 | 340.71 | 272.30 | -140.47 | -118.39 | -1509.35461 | -1510.95628 | -1510.70499 | 122.77       | 119.59       | 33.80        | 36.98        |
| <b>TS1</b>                                                                                                                           | 185i             | 319.02 | 340.97 | 280.48 | -40.74  | -30.45  | -1509.55424 | -1511.14187 | -1510.74042 | -2.50        | 3.13         | 11.57        | 5.94         |
| <b>4t</b>                                                                                                                            | 0                | 322.53 | 343.43 | 286.37 | -44.96  | -33.88  | -1509.56056 | -1511.15735 | -1510.75198 | -6.47        | -6.58        | 4.32         | 4.43         |
| <i>..with disfavored Ph-trans-to-N=N orientation (3.9 kcal/mol less stable Aa than A, 1.8 kcal/mol higher TS1a than TS1)</i>         |                  |        |        |        |         |         |             |             |             |              |              |              |              |
| <b>TS1a</b>                                                                                                                          | 273i             | 319.09 | 340.93 | 281.14 | -40.06  | -30.23  | -1509.55101 | -1511.14037 | -1510.73751 | -0.47        | 4.07         | 13.40        | 8.85         |
| <b>Aa</b>                                                                                                                            | 0                | 321.73 | 343.04 | 284.82 | -43.95  | -32.63  | -1509.55373 | -1511.15070 | -1510.74581 | -2.18        | -2.41        | 8.19         | 8.41         |

*..The cis adduct formation is kinetically 6.7 kcal/mol less favorable*

|                |      |        |        |        |        |        |             |             |             |       |       |              |       |
|----------------|------|--------|--------|--------|--------|--------|-------------|-------------|-------------|-------|-------|--------------|-------|
| <b>1a + 2a</b> | 0    | 320.66 | 341.58 | 269.11 | -41.48 | -29.42 | -1509.55026 | -1511.14686 | -1510.75886 | 0.00  | 0.00  | <i>0.00</i>  | 0.00  |
| <b>TS1c</b>    | 218i | 318.92 | 340.65 | 281.34 | -40.00 | -29.32 | -1509.54610 | -1511.13430 | -1510.72967 | 2.61  | 7.88  | <i>18.31</i> | 13.04 |
| <b>4c</b>      | 0    | 322.50 | 343.25 | 286.76 | -42.30 | -31.60 | -1509.55135 | -1511.14755 | -1510.73791 | -0.69 | -0.43 | <i>13.15</i> | 12.89 |

*..followed by mNHO 2a catalyzed 1,2- H-shift to the next N site*

|                                        |       |        |        |        |         |         |             |             |             |       |       |              |       |
|----------------------------------------|-------|--------|--------|--------|---------|---------|-------------|-------------|-------------|-------|-------|--------------|-------|
| <b>4t + 2a</b>                         | 0     | 545.46 | 579.50 | 480.90 | -72.80  | -54.03  | -2411.02408 | -2413.58542 | -2412.89913 | 0.00  | 0.00  | <i>4.32</i>  | 0.00  |
| <b>TS2</b>                             | 1618i | 539.19 | 575.22 | 487.78 | -57.19  | -43.17  | -2411.03289 | -2413.58879 | -2412.87726 | -5.53 | -2.12 | <i>18.04</i> | 10.32 |
| <b>B<sup>-</sup> + 2aH<sup>+</sup></b> | 0     | 545.40 | 579.44 | 480.71 | -139.86 | -116.17 | -2410.91151 | -2413.47101 | -2412.88404 | 70.64 | 71.79 | <i>13.79</i> | 8.32  |
| <b>TS3</b>                             | 1411i | 538.67 | 575.11 | 486.85 | -58.19  | -44.81  | -2411.02563 | -2413.57986 | -2412.87241 | -0.97 | 3.49  | <i>21.09</i> | 12.31 |
| <b>C + 2a</b>                          | 0     | 545.86 | 579.67 | 481.51 | -67.45  | -49.38  | -2411.03344 | -2413.59299 | -2412.89833 | -5.87 | -4.76 | <i>4.82</i>  | -0.61 |

*....with Ph trans to the pro-carbenic C–H: C0 is kinetically 0.5 kcal/mol and thermodynamically 0.7 kcal/mol less favorable than C*

|                                         |       |        |        |        |         |         |             |             |             |       |       |              |       |
|-----------------------------------------|-------|--------|--------|--------|---------|---------|-------------|-------------|-------------|-------|-------|--------------|-------|
| <b>TS20</b>                             | 1561i | 539.56 | 575.41 | 489.14 | -54.58  | -42.19  | -2411.03505 | -2413.59189 | -2412.87664 | -6.88 | -4.06 | <i>18.44</i> | 11.30 |
| <b>B0<sup>-</sup> + 2aH<sup>+</sup></b> | 0     | 545.13 | 579.24 | 480.43 | -137.99 | -115.15 | -2410.91823 | -2413.47831 | -2412.89018 | 66.43 | 67.21 | <i>9.94</i>  | 4.84  |
| <b>TS30</b>                             | 1314i | 539.37 | 575.38 | 488.50 | -55.29  | -42.81  | -2411.03046 | -2413.58486 | -2412.87160 | -4.00 | 0.35  | <i>21.60</i> | 12.92 |
| <b>C0 + 2a</b>                          | 0     | 546.09 | 579.81 | 482.00 | -67.13  | -49.27  | -2411.03324 | -2413.59283 | -2412.89720 | -5.75 | -4.65 | <i>5.53</i>  | 0.12  |

*..H-shift to terminal C=O is possible but 11.2 kcal/mol less stable*

|                                         |      |        |        |        |         |         |             |             |             |       |       |              |       |
|-----------------------------------------|------|--------|--------|--------|---------|---------|-------------|-------------|-------------|-------|-------|--------------|-------|
| <b>TS3a</b>                             | 857i | 539.38 | 575.11 | 488.71 | -52.53  | -39.99  | -2411.03175 | -2413.59107 | -2412.87299 | -4.81 | -3.55 | <i>20.72</i> | 15.14 |
| <b>Ca + 2a</b>                          | 0    | 545.44 | 579.33 | 480.90 | -65.46  | -47.79  | -2411.01527 | -2413.57670 | -2412.88049 | -0.94 | -1.11 | <i>16.02</i> | 16.19 |
| <b>Bc<sup>-</sup> + 2aH<sup>+</sup></b> | 0    | 544.06 | 578.49 | 479.12 | -134.49 | -112.61 | -2410.89621 | -2413.45396 | -2412.86387 | 80.24 | 82.49 | <i>26.45</i> | 19.89 |

*..followed by N-N rotation via TS4 rather than N inversion via TS4a ; The Cn with N-protonation at the other N-site is 2.5 kcal/mol less stable*

|          |   |        |        |        |        |        |             |             |             |        |        |             |      |
|----------|---|--------|--------|--------|--------|--------|-------------|-------------|-------------|--------|--------|-------------|------|
| <b>C</b> | 0 | 322.93 | 343.60 | 286.97 | -39.61 | -29.23 | -1509.56992 | -1511.16493 | -1510.75118 | -12.34 | -11.34 | <i>4.82</i> | 3.82 |
|----------|---|--------|--------|--------|--------|--------|-------------|-------------|-------------|--------|--------|-------------|------|

|                         |      |        |        |        |        |        |             |             |             |       |       |       |       |
|-------------------------|------|--------|--------|--------|--------|--------|-------------|-------------|-------------|-------|-------|-------|-------|
| <b>Cn</b>               | 0    | 322.87 | 343.82 | 286.65 | -41.29 | -31.09 | -1509.56402 | -1511.15746 | -1510.74720 | -8.64 | -6.65 | 7.32  | 5.33  |
| <b>TS4</b> (rotation)   | 34i  | 320.06 | 341.48 | 283.13 | -35.49 | -26.22 | -1509.53893 | -1511.13592 | -1510.72349 | 7.11  | 6.87  | 22.20 | 22.44 |
| <b>TS4a</b> (inversion) | 385i | 319.00 | 341.19 | 279.96 | -41.38 | -29.65 | -1509.51462 | -1511.11539 | -1510.71348 | 22.36 | 19.75 | 28.47 | 31.09 |
| <b>D</b>                | 0    | 322.59 | 343.52 | 286.60 | -41.00 | -29.86 | -1509.56026 | -1511.16016 | -1510.74801 | -6.28 | -8.35 | 6.81  | 8.88  |

*..and further CH<sub>3</sub>OH elimination*

|                             |       |        |        |        |        |        |             |             |             |       |       |       |       |
|-----------------------------|-------|--------|--------|--------|--------|--------|-------------|-------------|-------------|-------|-------|-------|-------|
| <b>TS5</b>                  | 29i   | 320.76 | 341.66 | 283.85 | -48.84 | -36.27 | -1509.53412 | -1511.13621 | -1510.73866 | 10.13 | 6.68  | 12.68 | 16.12 |
| <b>E</b>                    | 0     | 322.68 | 343.26 | 287.13 | -47.27 | -35.04 | -1509.53887 | -1511.14098 | -1510.73625 | 7.14  | 3.69  | 14.19 | 17.64 |
| <b>TS6</b>                  | 1105i | 316.79 | 338.47 | 278.91 | -44.20 | -31.94 | -1509.52859 | -1511.12399 | -1510.72740 | 13.60 | 14.35 | 19.74 | 18.98 |
| <b>E + CH<sub>3</sub>OH</b> | 0     | 320.11 | 341.60 | 271.64 | -54.44 | -34.32 | -1509.52313 | -1511.12967 | -1510.74546 | 17.02 | 10.79 | 8.41  | 14.64 |

*..and final intramolecular H-shift from N-H bond to the carbene carbon site*

|                                   |       |        |        |        |        |        |             |             |             |       |       |        |       |
|-----------------------------------|-------|--------|--------|--------|--------|--------|-------------|-------------|-------------|-------|-------|--------|-------|
| <b>1a + 2a - CH<sub>3</sub>OH</b> | 0     | 289.02 | 307.28 | 251.73 | -29.64 | -24.64 | -1393.75239 | -1395.23520 | -1394.87031 | 0.00  | 0.00  | 0.00   | 0.00  |
| <b>F</b>                          | 0     | 288.47 | 307.30 | 254.25 | -42.59 | -29.55 | -1393.72526 | -1395.21801 | -1394.85691 | 17.02 | 10.79 | 8.41   | 14.64 |
| <b>TS7</b>                        | 1498i | 284.26 | 303.43 | 248.76 | -36.51 | -27.32 | -1393.71323 | -1395.19816 | -1394.84226 | 24.57 | 23.25 | 17.60  | 18.93 |
| <b>3aa</b>                        | 0     | 288.37 | 307.24 | 253.92 | -44.64 | -33.51 | -1393.75316 | -1395.24144 | -1394.88719 | -0.49 | -3.92 | -10.59 | -7.16 |

*Some high-lying intermediates: direct MeOH elimination to form ketene C=C=O unit is unlikely*

|                       |     |        |        |        |        |        |             |             |             |       |       |       |       |
|-----------------------|-----|--------|--------|--------|--------|--------|-------------|-------------|-------------|-------|-------|-------|-------|
| <b>G</b>              | 0   | 287.30 | 306.61 | 252.52 | -36.60 | -26.92 | -1393.72221 | -1395.20468 | -1394.84216 | 18.93 | 19.15 | 17.66 | 17.44 |
| <b>TS8</b> (rotation) | 20i | 284.36 | 304.54 | 248.14 | -42.99 | -31.15 | -1393.68723 | -1395.16359 | -1394.81478 | 40.89 | 44.94 | 34.84 | 30.80 |
| <b>Gc</b>             | 0   | 286.66 | 306.03 | 251.89 | -36.05 | -27.13 | -1393.71021 | -1395.18985 | -1394.82867 | 26.47 | 28.46 | 26.13 | 24.14 |

*..also, acyclic and cyclic intermediates with OH group are also highly in free energy*

|           |   |        |        |        |        |        |             |             |             |       |       |       |       |
|-----------|---|--------|--------|--------|--------|--------|-------------|-------------|-------------|-------|-------|-------|-------|
| <b>Ca</b> | 0 | 322.51 | 343.26 | 286.36 | -37.62 | -27.65 | -1509.55175 | -1511.14863 | -1510.73333 | -0.94 | -1.11 | 16.02 | 16.19 |
|-----------|---|--------|--------|--------|--------|--------|-------------|-------------|-------------|-------|-------|-------|-------|



|            |      |        |        |        |        |        |             |             |             |       |       |              |       |
|------------|------|--------|--------|--------|--------|--------|-------------|-------------|-------------|-------|-------|--------------|-------|
| <b>Cb</b>  | 0    | 322.02 | 342.72 | 286.23 | -36.57 | -27.15 | -1509.54116 | -1511.13655 | -1510.72067 | 5.71  | 6.47  | <b>23.96</b> | 23.19 |
| <b>TS9</b> | 390i | 317.74 | 339.12 | 280.44 | -44.49 | -33.36 | -1509.49986 | -1511.09273 | -1510.69596 | 31.62 | 33.97 | <b>39.47</b> | 37.12 |
| <b>Cc</b>  | 0    | 322.12 | 342.66 | 286.47 | -41.62 | -29.93 | -1509.53511 | -1511.14171 | -1510.72987 | 9.51  | 3.23  | <b>18.19</b> | 24.46 |

---

*When more electron-deficient diazo **7** is used in reaction with mNHO **2a** : reversed N-protonation site.*

*The formation of **Cn**-like adduct **8** is now -5.3 kcal/mol exergonic while that of **C**-like adduct **6a** is 3.1 kcal/mol endergonic.*

|                    |   |        |        |        |        |        |             |             |             |        |        |              |       |
|--------------------|---|--------|--------|--------|--------|--------|-------------|-------------|-------------|--------|--------|--------------|-------|
| <b>2a + 7</b>      | 0 | 329.83 | 350.83 | 278.69 | -41.96 | -30.02 | -1472.63320 | -1474.18751 | -1473.78520 | 0.00   | 0.00   | <b>0.00</b>  | 0.00  |
| <b>8 (Cn-like)</b> | 0 | 333.29 | 353.93 | 297.75 | -42.03 | -31.57 | -1472.66638 | -1474.22086 | -1473.79366 | -20.82 | -20.92 | <b>-5.31</b> | -5.20 |
| <b>8a (C-like)</b> | 0 | 333.12 | 353.53 | 297.84 | -43.05 | -31.93 | -1472.65698 | -1474.20697 | -1473.78020 | -14.92 | -12.21 | <b>3.14</b>  | 0.42  |

**Table S5.** TPSS-D3/def2-TZVP + COSMO optimized Cartesian coordinates (in Å) in THF.

Each structure is labeled by the specific name (See also Table S4 and Figure S62), followed by the number of atoms, the total energy, and the detailed atomic coordinates (in double-column text list). Abbreviations for substituents: Mes = mesityl C<sub>6</sub>H<sub>2</sub>Me<sub>3</sub>, E = CO<sub>2</sub>Me and Ph = C<sub>6</sub>H<sub>5</sub>.

**Aa** : higher cis C..N adduct with Ph trans to N=N  
64

Energy = -1509.493497778

|   |            |            |            |
|---|------------|------------|------------|
| N | -2.1639228 | -0.5787630 | 1.4323531  |
| N | -0.8729949 | -0.3074845 | 1.3072135  |
| N | -2.7523493 | 0.2028684  | 0.5326996  |
| C | -0.6116179 | 0.6403045  | 0.3501675  |
| C | 0.0824062  | -1.0560501 | 2.1399632  |
| C | -4.1860460 | 0.1455826  | 0.3490704  |
| C | -1.8540710 | 0.9634022  | -0.1524983 |
| C | 0.7720952  | 1.0864186  | -0.0422856 |
| H | 0.8278574  | -0.3621118 | 2.5267853  |
| H | 0.5767388  | -1.7993090 | 1.5133942  |
| H | -0.4901599 | -1.5179820 | 2.9425628  |
| C | -4.7134735 | -0.9380245 | -0.3667627 |
| C | -4.9633022 | 1.1796712  | 0.8800542  |
| H | -2.1508777 | 1.6471041  | -0.9303154 |
| C | 0.7003197  | 1.9247186  | -1.3049301 |
| H | 1.1921796  | 1.6881297  | 0.7782420  |
| C | -6.0971565 | -0.9613895 | -0.5462339 |
| C | -3.8320665 | -2.0287532 | -0.9194430 |
| C | -6.3439763 | 1.1028026  | 0.6712603  |
| C | -4.3494601 | 2.3223348  | 1.6479455  |
| C | 0.8604580  | 3.3118412  | -1.2531050 |
| C | 0.4757579  | 1.3055019  | -2.5414558 |
| C | -6.9260177 | 0.0465541  | -0.0361128 |
| H | -6.5358606 | -1.7873348 | -1.1011235 |
| H | -2.9936786 | -1.6152009 | -1.4912593 |
| H | -3.4104938 | -2.6403647 | -0.1142741 |
| H | -4.4069223 | -2.6815770 | -1.5791703 |
| H | -6.9769143 | 1.8881837  | 1.0770814  |
| H | -3.6768247 | 1.9603382  | 2.4327892  |
| H | -3.7661695 | 2.9774017  | 0.9903469  |
| H | -5.1302315 | 2.9259548  | 2.1150241  |
| C | 0.7963115  | 4.0753265  | -2.4215839 |
| H | 1.0411327  | 3.7960369  | -0.2962266 |
| C | 0.4105235  | 2.0661675  | -3.7079024 |
| H | 0.3730727  | 0.2246732  | -2.5784558 |
| C | -8.4175523 | -0.0114226 | -0.2504594 |
| C | 0.5691065  | 3.4541965  | -3.6505312 |
| H | 0.9272429  | 5.1527338  | -2.3707668 |
| H | 0.2403267  | 1.5781835  | -4.6637800 |
| H | -8.9176470 | 0.8369843  | 0.2234002  |
| H | -8.8345684 | -0.9355925 | 0.1652214  |
| H | -8.6564581 | 0.0002919  | -1.3200501 |
| H | 0.5200296  | 4.0463361  | -4.5600546 |
| N | 1.5847256  | -0.1324308 | -0.2309774 |
| N | 2.5804660  | -0.1176302 | 0.6050329  |
| C | 3.3743722  | -1.1996690 | 0.7188544  |
| C | 3.1691111  | -2.4800148 | 0.0100402  |
| C | 4.4645157  | -1.0728797 | 1.6699078  |

|   |           |            |            |
|---|-----------|------------|------------|
| C | 3.4087953 | -3.7139550 | 0.6515239  |
| C | 2.6795440 | -2.5229988 | -1.3122376 |
| O | 5.3368358 | -1.9242250 | 1.8850160  |
| O | 4.4884791 | 0.1250338  | 2.3494074  |
| C | 3.1752067 | -4.9254059 | 0.0048699  |
| H | 3.7861774 | -3.7132433 | 1.6676412  |
| C | 2.4513146 | -3.7377704 | -1.9589031 |
| H | 2.4738917 | -1.5937825 | -1.8270288 |
| C | 5.6151761 | 0.2710490  | 3.2358510  |
| C | 2.6945790 | -4.9482663 | -1.3077252 |
| H | 3.3675850 | -5.8580632 | 0.5304397  |
| H | 2.0796480 | -3.7363062 | -2.9811849 |
| H | 5.5289162 | 1.2807011  | 3.6384870  |
| H | 5.5765630 | -0.4680426 | 4.0418523  |
| H | 6.5569003 | 0.1557224  | 2.6916570  |
| H | 2.5118326 | -5.8937053 | -1.8120599 |

**4c** : cis C..N adduct of **1a** and **2a**

64

Energy = -1509.490903398

|   |            |            |            |
|---|------------|------------|------------|
| N | 0.1359182  | -1.5492807 | -1.5796180 |
| N | 1.2122745  | -0.7687829 | -1.5202769 |
| N | -0.4322282 | -1.3907705 | -0.3838874 |
| C | 1.3474363  | -0.1157596 | -0.3270480 |
| C | 2.1074450  | -0.6918654 | -2.6792425 |
| C | -1.6277706 | -2.1367103 | -0.0513994 |
| C | 0.2591173  | -0.5348527 | 0.4117649  |
| C | 2.5104148  | 0.7735352  | 0.0105216  |
| H | 3.0800914  | -1.0998652 | -2.3983586 |
| H | 2.2059236  | 0.3552412  | -2.9687152 |
| H | 1.6593665  | -1.2815879 | -3.4762933 |
| C | -2.8679821 | -1.4964545 | -0.1325438 |
| C | -1.4627328 | -3.4715475 | 0.3489838  |
| H | -0.0684340 | -0.2774454 | 1.4045746  |
| C | 3.6841035  | -0.0749719 | 0.4631897  |
| H | 2.7789228  | 1.3202412  | -0.9039769 |
| C | -3.9909423 | -2.2610869 | 0.2082161  |
| C | -3.0125402 | -0.0546647 | -0.5409998 |
| C | -2.6164618 | -4.1811742 | 0.6794277  |
| C | -0.0999196 | -4.1121527 | 0.4206810  |
| C | 4.8845188  | -0.0533716 | -0.2521901 |
| C | 3.5819432  | -0.8787537 | 1.6045223  |
| C | -3.8875359 | -3.5933953 | 0.6132465  |
| H | -4.9719002 | -1.7954463 | 0.1493026  |
| H | -4.0103305 | 0.1203268  | -0.9505816 |
| H | -2.8875615 | 0.6092721  | 0.3221637  |
| H | -2.2706628 | 0.2485724  | -1.2833844 |
| H | -2.5189214 | -5.2169926 | 0.9962762  |
| H | 0.5880703  | -3.5197374 | 1.0349150  |
| H | -0.1737800 | -5.1105416 | 0.8564542  |

|   |            |            |            |
|---|------------|------------|------------|
| H | 0.3464512  | -4.2042872 | -0.5755923 |
| C | 5.9710318  | -0.8261260 | 0.1643811  |
| H | 4.9721053  | 0.5796311  | -1.1322049 |
| C | 4.6647452  | -1.6500671 | 2.0234245  |
| H | 2.6548993  | -0.8894516 | 2.1717361  |
| C | -5.1167266 | -4.3923395 | 0.9674663  |
| C | 5.8617271  | -1.6276750 | 1.3016849  |
| H | 6.9006170  | -0.7987298 | -0.3972711 |
| H | 4.5773985  | -2.2683067 | 2.9126267  |
| H | -5.0304728 | -4.8149704 | 1.9746644  |
| H | -5.2475850 | -5.2308421 | 0.2734722  |
| H | -6.0153739 | -3.7714112 | 0.9281807  |
| H | 6.7049625  | -2.2305198 | 1.6269151  |
| N | 2.1633839  | 1.7180731  | 1.1200030  |
| N | 1.0680410  | 2.3948461  | 1.0872749  |
| C | 0.1368540  | 2.4855321  | 0.0867904  |
| C | -1.2120801 | 2.8279844  | 0.5771646  |
| C | 0.4448124  | 2.3957179  | -1.3225263 |
| C | -1.5744291 | 2.4402364  | 1.8852128  |
| C | -2.1749480 | 3.5321811  | -0.1745375 |
| O | 1.5518715  | 2.5764499  | -1.8561170 |
| O | -0.6548765 | 2.1122550  | -2.1062800 |
| C | -2.8320041 | 2.7298568  | 2.4117769  |
| H | -0.8472375 | 1.9026623  | 2.4864182  |
| C | -3.4347983 | 3.8115175  | 0.3484435  |
| H | -1.9358324 | 3.8618950  | -1.1786457 |
| C | -0.4560176 | 2.2607916  | -3.5280569 |
| C | -3.7786557 | 3.4097690  | 1.6430454  |
| H | -3.0775419 | 2.4077264  | 3.4207862  |
| H | -4.1538839 | 4.3561146  | -0.2587559 |
| H | 0.2362194  | 1.5035063  | -3.9059298 |
| H | -1.4429960 | 2.1231223  | -3.9702575 |
| H | -0.0624433 | 3.2539524  | -3.7589175 |
| H | -4.7657655 | 3.6237705  | 2.0433644  |

**4t** : trans C..N adduct of **1a** and **2a**

64

Energy = -1509.499719369

|   |            |            |            |
|---|------------|------------|------------|
| N | -0.7430011 | -1.9043421 | 0.5699938  |
| N | -1.9507042 | -1.3565551 | 0.6737596  |
| N | 0.0414916  | -0.8739866 | 0.2590392  |
| C | -1.9583782 | -0.0052137 | 0.4509639  |
| C | -3.0874217 | -2.2176499 | 1.0146438  |
| C | 1.4660168  | -1.0504271 | 0.0991326  |
| C | -0.6382279 | 0.3016873  | 0.1685631  |
| C | -3.1304660 | 0.8904402  | 0.6663750  |
| H | -2.7097664 | -3.2347165 | 1.0980097  |
| H | -3.8353319 | -2.1507301 | 0.2235598  |
| H | -3.5109511 | -1.8914306 | 1.9656466  |
| C | 2.3008102  | -0.5365794 | 1.0999705  |
| C | 1.9377112  | -1.6724222 | -1.0632019 |
| H | -0.1529883 | 1.2448743  | -0.0289832 |
| C | -3.6073587 | 1.5312671  | -0.6273003 |
| H | -3.9534053 | 0.2993783  | 1.0769444  |
| C | 3.6778677  | -0.6682589 | 0.9021577  |

|   |            |            |            |
|---|------------|------------|------------|
| C | 1.7471071  | 0.1247415  | 2.3366161  |
| C | 3.3231952  | -1.7780845 | -1.2059294 |
| C | 0.9995458  | -2.1907545 | -2.1229891 |
| C | -4.9043429 | 1.2835807  | -1.0886497 |
| C | -2.7783212 | 2.3973658  | -1.3530072 |
| C | 4.2054752  | -1.2846881 | -0.2375292 |
| H | 4.3520360  | -0.2791463 | 1.6614631  |
| H | 0.9900760  | -0.5041659 | 2.8176093  |
| H | 2.5487853  | 0.3082032  | 3.0550910  |
| H | 1.2711204  | 1.0822616  | 2.0989753  |
| H | 3.7201304  | -2.2482692 | -2.1026170 |
| H | 1.5609730  | -2.4920120 | -3.0098452 |
| H | 0.4347381  | -3.0571410 | -1.7623608 |
| H | 0.2720746  | -1.4264602 | -2.4191101 |
| C | -5.3693816 | 1.8845089  | -2.2604153 |
| H | -5.5563245 | 0.6200093  | -0.5246368 |
| C | -3.2427743 | 2.9986898  | -2.5211788 |
| H | -1.7826061 | 2.6207513  | -0.9800214 |
| C | 5.6960767  | -1.4353229 | -0.4100016 |
| C | -4.5378351 | 2.7420605  | -2.9817657 |
| H | -6.3799104 | 1.6841819  | -2.6061811 |
| H | -2.5942950 | 3.6729960  | -3.0742382 |
| H | 5.9772691  | -1.3960148 | -1.4665318 |
| H | 6.0311022  | -2.4026502 | -0.0148550 |
| H | 6.2374173  | -0.6523350 | 0.1284967  |
| H | -4.8959284 | 3.2115141  | -3.8937695 |
| N | -2.8072565 | 1.9248826  | 1.7203244  |
| N | -1.6537938 | 2.4346511  | 1.4685697  |
| C | -1.0789669 | 3.3971911  | 2.2131174  |
| C | -1.6565969 | 4.0134609  | 3.4204950  |
| C | 0.2139301  | 3.8246955  | 1.7134397  |
| C | -0.8431430 | 4.5453041  | 4.4462095  |
| C | -3.0545999 | 4.0673833  | 3.6121032  |
| O | 0.9187772  | 4.7352011  | 2.1579808  |
| O | 0.6556469  | 3.1077169  | 0.6014227  |
| C | -1.3990039 | 5.1061181  | 5.5938290  |
| H | 0.2335406  | 4.5192450  | 4.3315325  |
| C | -3.6057296 | 4.6356340  | 4.7605173  |
| H | -3.7008059 | 3.6492493  | 2.8515921  |
| C | 1.9360039  | 3.5363477  | 0.0948227  |
| C | -2.7859373 | 5.1595654  | 5.7620478  |
| H | -0.7421749 | 5.5023504  | 6.3648857  |
| H | -4.6872863 | 4.6676713  | 4.8718415  |
| H | 1.8967119  | 4.5800300  | -0.2277461 |
| H | 2.7122301  | 3.4247296  | 0.8571255  |
| H | 2.1392690  | 2.8818827  | -0.7543775 |
| H | -3.2176188 | 5.5981100  | 6.6579086  |

**Bc<sup>-</sup>** : C-H bond deprotonated adduct **4c**

63

Energy = -1508.972460762

|   |            |            |            |
|---|------------|------------|------------|
| N | -0.5435407 | -1.3356277 | -1.1590749 |
| N | -1.6727398 | -0.6301192 | -0.8773355 |
| N | 0.3741702  | -0.7487135 | -0.4033395 |
| C | -1.4812555 | 0.3725216  | 0.1075749  |

|   |            |            |            |
|---|------------|------------|------------|
| C | -2.7740792 | -0.7735902 | -1.8152419 |
| C | 1.7257228  | -1.2516132 | -0.3667483 |
| C | -0.0856338 | 0.2739013  | 0.3455464  |
| C | -2.4269258 | 1.3034225  | 0.5599943  |
| H | -2.3926864 | -1.3140621 | -2.6817567 |
| H | -3.1164564 | 0.2229440  | -2.1070671 |
| H | -3.6156158 | -1.3113221 | -1.3713009 |
| C | 2.0914372  | -2.0692424 | 0.7096838  |
| C | 2.6150106  | -0.8591580 | -1.3728840 |
| H | 0.5831332  | 0.8360308  | 0.9700230  |
| C | -3.8697769 | 1.1586629  | 0.3742888  |
| C | 3.4170353  | -2.5114477 | 0.7499563  |
| C | 1.1040667  | -2.4464795 | 1.7832394  |
| C | 3.9280327  | -1.3299942 | -1.2845195 |
| C | 2.1863864  | 0.0605533  | -2.4879220 |
| C | -4.5126234 | -0.0884514 | 0.5421117  |
| C | -4.7002290 | 2.2808852  | 0.1453602  |
| C | 4.3462972  | -2.1502025 | -0.2308943 |
| H | 3.7276743  | -3.1535343 | 1.5713914  |
| H | 0.1735233  | -2.8260443 | 1.3469735  |
| H | 1.5269277  | -3.2224596 | 2.4266331  |
| H | 0.8368616  | -1.5866368 | 2.4098164  |
| H | 4.6392995  | -1.0438284 | -2.0564718 |
| H | 2.9564221  | 0.1058647  | -3.2617877 |
| H | 1.2485552  | -0.2716698 | -2.9429465 |
| H | 2.0230540  | 1.0764994  | -2.1081864 |
| C | -5.8961993 | -0.2174085 | 0.4379439  |
| H | -3.9140400 | -0.9571521 | 0.8024788  |
| C | -6.0803923 | 2.1495998  | 0.0407371  |
| H | -4.2332910 | 3.2565074  | 0.0537688  |
| C | 5.7803235  | -2.6112033 | -0.1379520 |
| C | -6.6966131 | 0.8976119  | 0.1775999  |
| H | -6.3533030 | -1.1940714 | 0.5830561  |
| H | -6.6870120 | 3.0321967  | -0.1523942 |
| H | 6.2312521  | -2.7072803 | -1.1303390 |
| H | 5.8540191  | -3.5742456 | 0.3761318  |
| H | 6.3802011  | -1.8876216 | 0.4288098  |
| H | -7.7762345 | 0.7997363  | 0.1003923  |
| N | -2.0561743 | 2.5372740  | 1.1242937  |
| N | -1.1102580 | 2.7314028  | 1.9853398  |
| C | -0.4491881 | 1.7310771  | 2.7268287  |
| C | 0.9652234  | 1.9897985  | 2.9475298  |
| C | -1.1087257 | 0.6164128  | 3.3308928  |
| C | 1.7876536  | 1.2818421  | 3.8650649  |
| C | 1.6161620  | 2.9750773  | 2.1538976  |
| O | -0.5948990 | -0.3239031 | 3.9736924  |
| O | -2.4920674 | 0.6722089  | 3.2182808  |
| C | 3.1452898  | 1.5588007  | 3.9855146  |
| H | 1.3384797  | 0.5009517  | 4.4653089  |
| C | 2.9732292  | 3.2546693  | 2.2941470  |
| H | 1.0228714  | 3.5146030  | 1.4221600  |
| C | -3.1840462 | -0.4503719 | 3.7811971  |
| C | 3.7596267  | 2.5505367  | 3.2099750  |
| H | 3.7378659  | 0.9858672  | 4.6966397  |
| H | 3.4250733  | 4.0200081  | 1.6654314  |

|   |            |            |           |
|---|------------|------------|-----------|
| H | -2.8530682 | -1.3849152 | 3.3168011 |
| H | -3.0182945 | -0.5147561 | 4.8616122 |
| H | -4.2384598 | -0.2732531 | 3.5636889 |
| H | 4.8235472  | 2.7528335  | 3.3035609 |

**B0<sup>-</sup>** : anion with Ph trans to pro-carbenic C-H  
63

Energy = -1508.995135910

|   |            |            |            |
|---|------------|------------|------------|
| N | -0.5445013 | -1.2943520 | -1.0248011 |
| N | -1.6973423 | -0.6117387 | -0.8137231 |
| N | 0.2936473  | -0.7383292 | -0.1488199 |
| C | -1.6045871 | 0.3488314  | 0.2088649  |
| C | -2.7554114 | -0.7469907 | -1.7972214 |
| C | 1.6641483  | -1.1754157 | -0.0852587 |
| C | -0.2544474 | 0.2414480  | 0.6023081  |
| C | -2.5927286 | 1.2842585  | 0.5996155  |
| H | -2.3211119 | -1.1876961 | -2.6946807 |
| H | -3.1478635 | 0.2524522  | -2.0056042 |
| H | -3.5755005 | -1.3676209 | -1.4245061 |
| C | 1.9557017  | -2.4029142 | 0.5206716  |
| C | 2.6473201  | -0.3228672 | -0.6051413 |
| H | 0.3161180  | 0.8091550  | 1.3171450  |
| C | -4.0173377 | 1.0187808  | 0.5467054  |
| C | 3.3013930  | -2.7742157 | 0.5993616  |
| C | 0.8675889  | -3.2889479 | 1.0716741  |
| C | 3.9767112  | -0.7406535 | -0.4968987 |
| C | 2.2882918  | 0.9866549  | -1.2603688 |
| C | -4.5513126 | -0.2930311 | 0.6332587  |
| C | -4.9575557 | 2.0828368  | 0.5065324  |
| C | 4.3224196  | -1.9562969 | 0.1038612  |
| H | 3.5548026  | -3.7225686 | 1.0685040  |
| H | 0.3028998  | -3.7664332 | 0.2636596  |
| H | 1.2978662  | -4.0713261 | 1.7016024  |
| H | 0.1531388  | -2.7128186 | 1.6694125  |
| H | 4.7591639  | -0.0987136 | -0.8956884 |
| H | 3.1791680  | 1.4489404  | -1.6920711 |
| H | 1.5530065  | 0.8357224  | -2.0587605 |
| H | 1.8459435  | 1.6829988  | -0.5396124 |
| C | -5.9231098 | -0.5280344 | 0.6250776  |
| H | -3.8721267 | -1.1336388 | 0.7557737  |
| C | -6.3265745 | 1.8419605  | 0.5092359  |
| H | -4.5803465 | 3.0999038  | 0.4786700  |
| C | 5.7693466  | -2.3623818 | 0.2414786  |
| C | -6.8317363 | 0.5346062  | 0.5547297  |
| H | -6.2876051 | -1.5507850 | 0.6987780  |
| H | -7.0143084 | 2.6846061  | 0.4686917  |
| H | 6.3755094  | -1.9469115 | -0.5691201 |
| H | 5.8771727  | -3.4512103 | 0.2381812  |
| H | 6.1846249  | -1.9920848 | 1.1875387  |
| H | -7.9027468 | 0.3512545  | 0.5520495  |
| N | -2.2335033 | 2.5283078  | 1.1348503  |
| N | -0.9632779 | 2.7221343  | 1.2905879  |
| C | -0.4929629 | 3.8974185  | 1.8325354  |
| C | -1.2862155 | 5.0922578  | 2.1376022  |
| C | 0.9216339  | 3.8835514  | 2.0835276  |

|   |            |           |           |
|---|------------|-----------|-----------|
| C | -0.8649563 | 6.0561529 | 3.0909473 |
| C | -2.5250534 | 5.3495982 | 1.4942886 |
| O | 1.6496701  | 4.8239149 | 2.4544049 |
| O | 1.5183258  | 2.6276742 | 1.8736848 |
| C | -1.6191277 | 7.1928977 | 3.3683722 |
| H | 0.0740785  | 5.9007964 | 3.6077217 |
| C | -3.2710352 | 6.4937512 | 1.7721157 |
| H | -2.8962682 | 4.6298012 | 0.7779355 |
| C | 2.9408626  | 2.6161295 | 2.0693265 |
| C | -2.8326356 | 7.4308705 | 2.7119931 |
| H | -1.2563188 | 7.9007497 | 4.1115193 |
| H | -4.2108270 | 6.6520521 | 1.2461506 |
| H | 3.4418006  | 3.3011470 | 1.3773152 |
| H | 3.2018129  | 2.8973564 | 3.0943133 |
| H | 3.2485325  | 1.5874182 | 1.8684089 |
| H | -3.4206845 | 8.3184310 | 2.9315614 |

**B<sup>-</sup>** : anion from C-H deprotonation of **4t**

63

Energy = -1508.990022908

|   |            |            |            |
|---|------------|------------|------------|
| N | -1.8930689 | -1.0832919 | 1.2205524  |
| N | -0.6577595 | -0.5570450 | 1.3351534  |
| N | -2.5208566 | -0.2155025 | 0.4210997  |
| C | -0.4733726 | 0.6130986  | 0.5942753  |
| C | 0.2652893  | -1.1527327 | 2.2879053  |
| C | -3.8736713 | -0.4852655 | 0.0126315  |
| C | -1.7340459 | 0.8093362  | 0.0230072  |
| C | 0.7486323  | 1.3355909  | 0.4344299  |
| H | 0.8709809  | -1.9089286 | 1.7845322  |
| H | -0.3260027 | -1.5727044 | 3.1044816  |
| H | 0.9108892  | -0.3514567 | 2.6540437  |
| C | -4.1051524 | -1.5633084 | -0.8516045 |
| C | -4.8937448 | 0.3521957  | 0.4841710  |
| H | -2.0854980 | 1.5586494  | -0.6663336 |
| C | 0.7288820  | 2.7749294  | 0.3206363  |
| N | 1.9713484  | 0.7029252  | 0.2104367  |
| C | -5.4276709 | -1.7934455 | -1.2446999 |
| C | -2.9843456 | -2.4414148 | -1.3479009 |
| C | -6.1962843 | 0.0762797  | 0.0608009  |
| C | -4.6078787 | 1.5062072  | 1.4125103  |
| C | -0.3877489 | 3.5706005  | 0.7023166  |
| C | 1.8666970  | 3.4864987  | -0.1596400 |
| N | 1.9207854  | -0.5858214 | 0.0742904  |
| C | -6.4824165 | -0.9909616 | -0.7986705 |
| H | -5.6335544 | -2.6174650 | -1.9244290 |
| H | -2.6965249 | -3.1744515 | -0.5866796 |
| H | -3.2981290 | -2.9816596 | -2.2446730 |
| H | -2.0892624 | -1.8573502 | -1.5836325 |
| H | -7.0057460 | 0.7101828  | 0.4164251  |
| H | -5.5320639 | 1.8486057  | 1.8842644  |
| H | -3.8991827 | 1.2221883  | 2.1967361  |
| H | -4.1735336 | 2.3547753  | 0.8707248  |
| C | -0.3800851 | 4.9555956  | 0.5801492  |
| H | -1.2631651 | 3.0893452  | 1.1313226  |
| C | 1.8699016  | 4.8726501  | -0.2623805 |

|   |            |            |            |
|---|------------|------------|------------|
| H | 2.7439888  | 2.9138692  | -0.4408133 |
| C | 3.0832877  | -1.2756332 | -0.1980056 |
| C | -7.9031506 | -1.2811488 | -1.2163473 |
| C | 0.7467089  | 5.6328235  | 0.0932391  |
| H | -1.2601892 | 5.5184415  | 0.8860727  |
| H | 2.7621188  | 5.3722207  | -0.6361531 |
| C | 4.3823499  | -0.6707694 | -0.5163462 |
| C | 2.9458229  | -2.7029180 | -0.1963773 |
| H | -8.4612749 | -0.3557588 | -1.3901698 |
| H | -8.4291475 | -1.8388933 | -0.4311860 |
| H | -7.9308007 | -1.8838465 | -2.1285881 |
| H | 0.7519210  | 6.7155172  | 0.0029354  |
| C | 5.6067123  | -1.3223846 | -0.2236639 |
| C | 4.4811990  | 0.5997313  | -1.1375701 |
| O | 3.8121130  | -3.5588302 | -0.4716622 |
| O | 1.6629138  | -3.1415842 | 0.1506159  |
| C | 6.8368864  | -0.7472018 | -0.5330374 |
| H | 5.5766983  | -2.2976095 | 0.2475064  |
| C | 5.7143098  | 1.1684031  | -1.4509909 |
| H | 3.5718264  | 1.1350249  | -1.3752877 |
| C | 1.4950823  | -4.5647308 | 0.1063367  |
| C | 6.9090310  | 0.5069143  | -1.1505690 |
| H | 5.7403686  | 2.1418279  | -1.9374809 |
| H | 1.6767919  | -4.9538326 | -0.9012183 |
| H | 2.1724519  | -5.0690013 | 0.8036375  |
| H | 0.4560578  | -4.7384033 | 0.3954679  |
| H | 7.8699074  | 0.9562160  | -1.3887120 |
| H | 7.7512095  | -1.2827566 | -0.2838126 |

**Ca** : C=O protonation of anion **B<sup>-</sup>**

64

Energy = -1509.480004971

|   |            |            |            |
|---|------------|------------|------------|
| N | -2.2091521 | -1.5451039 | -0.7060658 |
| N | -0.9196047 | -1.1380045 | -0.6849084 |
| N | -2.8739613 | -0.4961741 | -0.2377638 |
| C | -0.7574753 | 0.1558541  | -0.1854518 |
| C | 0.0831151  | -2.0592314 | -1.2092326 |
| C | -4.3110053 | -0.5584845 | -0.1122374 |
| C | -2.0784019 | 0.5464581  | 0.0885967  |
| C | 0.4603828  | 0.8557020  | 0.0075688  |
| H | -0.4583013 | -2.8556919 | -1.7211072 |
| H | 0.7016071  | -2.4558974 | -0.4025183 |
| H | 0.7317919  | -1.5167486 | -1.8978255 |
| C | -5.0869733 | 0.1307325  | -1.0507398 |
| C | -4.8556778 | -1.2890071 | 0.9517315  |
| H | -2.4755123 | 1.4547913  | 0.5081138  |
| C | 0.4142843  | 2.3083561  | 0.2660170  |
| H | 3.7994458  | 2.0827017  | 0.0041957  |
| C | -6.4756587 | 0.0678558  | -0.8985820 |
| C | -4.4617757 | 0.9115217  | -2.1791930 |
| C | -6.2480858 | -1.3164021 | 1.0577691  |
| C | -3.9812605 | -2.0110838 | 1.9446801  |
| C | -0.4431450 | 3.1473084  | -0.4723220 |
| C | 1.2207156  | 2.9089771  | 1.2545273  |
| C | -7.0721520 | -0.6489850 | 0.1434237  |

|   |            |            |            |
|---|------------|------------|------------|
| H | -7.1032371 | 0.5921597  | -1.6155971 |
| H | -4.0057266 | 1.8395090  | -1.8145423 |
| H | -3.6764513 | 0.3340262  | -2.6774902 |
| H | -5.2195615 | 1.1783654  | -2.9191982 |
| H | -6.6973374 | -1.8692567 | 1.8797299  |
| H | -3.5005582 | -2.8805195 | 1.4836888  |
| H | -3.1848043 | -1.3598248 | 2.3211870  |
| H | -4.5765423 | -2.3557580 | 2.7931437  |
| C | -0.5099445 | 4.5180373  | -0.2260134 |
| H | -1.0519454 | 2.7171472  | -1.2641189 |
| C | 1.1595863  | 4.2794371  | 1.4954815  |
| H | 1.8909451  | 2.2893115  | 1.8393412  |
| C | -8.5736184 | -0.7204944 | 0.2704709  |
| C | 0.2937118  | 5.0950275  | 0.7596845  |
| H | -1.1803285 | 5.1386035  | -0.8154968 |
| H | 1.7879689  | 4.7148980  | 2.2685557  |
| H | -8.9471165 | -1.6761581 | -0.1180177 |
| H | -9.0565624 | 0.0819747  | -0.2938177 |
| H | -8.8844430 | -0.6497076 | 1.3176179  |
| H | 0.2511040  | 6.1640324  | 0.9488238  |
| N | 1.5868879  | 0.0931801  | -0.0413434 |
| N | 2.7296728  | 0.6852440  | 0.0685034  |
| C | 3.8850652  | -0.1084416 | -0.0084701 |
| C | 3.9303848  | -1.5742342 | 0.0307482  |
| C | 4.9937477  | 0.7151835  | -0.0666778 |
| C | 4.8661582  | -2.3054002 | -0.7273881 |
| C | 3.0360071  | -2.3017433 | 0.8434210  |
| O | 4.8150341  | 2.0510900  | -0.0533110 |
| O | 6.2595997  | 0.2754107  | -0.1091337 |
| C | 4.9127306  | -3.6972696 | -0.6685132 |
| H | 5.5602510  | -1.7728823 | -1.3694326 |
| C | 3.0833544  | -3.6932088 | 0.8982524  |
| H | 2.3070148  | -1.7623471 | 1.4372735  |
| C | 7.3065229  | 1.2784874  | -0.1096454 |
| C | 4.0198696  | -4.4033685 | 0.1418161  |
| H | 5.6452954  | -4.2337274 | -1.2667199 |
| H | 2.3867071  | -4.2274307 | 1.5400353  |
| H | 8.2335434  | 0.7081873  | -0.1504577 |
| H | 7.2137311  | 1.9251913  | -0.9853248 |
| H | 7.2625679  | 1.8753993  | 0.8045239  |
| H | 4.0526266  | -5.4886674 | 0.1829882  |

**Cb** : C=O protonation of anion **Bc<sup>-</sup>**

64

Energy = -1509.471874855

|   |            |            |            |
|---|------------|------------|------------|
| N | -2.1847460 | -1.6361719 | -0.4929895 |
| N | -0.9236460 | -1.1574126 | -0.5008863 |
| N | -2.9202999 | -0.5710208 | -0.1960429 |
| C | -0.8461640 | 0.1994050  | -0.1942414 |
| C | 0.1415402  | -2.0851240 | -0.8756528 |
| C | -4.3558345 | -0.6951030 | -0.1016424 |
| C | -2.1902584 | 0.5509837  | -0.0072698 |
| C | 0.3372602  | 0.9822068  | -0.0959332 |
| H | -0.3323704 | -2.9191017 | -1.3951286 |
| H | 0.6788562  | -2.4300516 | 0.0076624  |

|   |            |            |            |
|---|------------|------------|------------|
| H | 0.8385461  | -1.5593085 | -1.5276473 |
| C | -5.1331790 | -0.1677672 | -1.1385808 |
| C | -4.8980318 | -1.3177116 | 1.0305060  |
| H | -2.6447535 | 1.4876625  | 0.2660170  |
| C | 0.1792358  | 2.4453476  | 0.0115919  |
| H | 4.1073999  | 0.9498052  | 1.0301657  |
| C | -6.5215241 | -0.2855310 | -1.0164855 |
| C | -4.5123498 | 0.5027297  | -2.3383757 |
| C | -6.2897523 | -1.4056327 | 1.1017917  |
| C | -4.0225580 | -1.8630156 | 2.1296200  |
| C | -0.7128903 | 3.1541124  | -0.8135677 |
| C | 0.9155214  | 3.1720909  | 0.9675386  |
| C | -7.1155175 | -0.8997552 | 0.0900293  |
| H | -7.1504350 | 0.1117519  | -1.8098316 |
| H | -4.1481351 | 1.5059181  | -2.0871329 |
| H | -3.6615868 | -0.0695472 | -2.7218745 |
| H | -5.2500962 | 0.6049810  | -3.1373447 |
| H | -6.7377796 | -1.8769883 | 1.9736695  |
| H | -3.4721132 | -2.7474065 | 1.7915801  |
| H | -3.2824369 | -1.1226882 | 2.4528139  |
| H | -4.6302074 | -2.1440478 | 2.9926075  |
| C | -0.8627952 | 4.5320629  | -0.6966374 |
| H | -1.2519681 | 2.6197055  | -1.5908287 |
| C | 0.7740662  | 4.5541478  | 1.0756645  |
| H | 1.5967767  | 2.6436718  | 1.6263509  |
| C | -8.6149372 | -1.0329526 | 0.1873729  |
| C | -0.1119432 | 5.2429993  | 0.2443007  |
| H | -1.5415771 | 5.0584604  | -1.3624706 |
| H | 1.3594116  | 5.0969748  | 1.8136425  |
| H | -8.9246568 | -2.0630894 | -0.0278672 |
| H | -9.1171326 | -0.3744800 | -0.5264395 |
| H | -8.9669419 | -0.7907025 | 1.1953559  |
| H | -0.2126863 | 6.3219462  | 0.3247170  |
| N | 1.4755111  | 0.2652238  | 0.1344901  |
| N | 2.6916463  | 0.7322121  | 0.0293577  |
| C | 3.0384949  | 1.9662377  | -0.5782109 |
| C | 2.4086005  | 2.5097505  | -1.7816049 |
| C | 4.2189667  | 2.4216689  | -0.0260339 |
| C | 2.4228437  | 3.8847012  | -2.0851608 |
| C | 1.7334565  | 1.6452072  | -2.6676228 |
| O | 4.7534920  | 1.7379192  | 1.0022621  |
| O | 4.9111632  | 3.4780082  | -0.4749639 |
| C | 1.7791431  | 4.3729283  | -3.2178892 |
| H | 2.9137185  | 4.5720798  | -1.4062939 |
| C | 1.0816101  | 2.1391928  | -3.7951271 |
| H | 1.7265608  | 0.5800993  | -2.4610270 |
| C | 6.1592377  | 3.7841497  | 0.1970508  |
| C | 1.0934781  | 3.5071461  | -4.0754210 |
| H | 1.7905783  | 5.4409494  | -3.4204485 |
| H | 0.5589109  | 1.4526917  | -4.4568161 |
| H | 6.5271032  | 4.6806189  | -0.3001448 |
| H | 5.9825002  | 3.9773165  | 1.2578565  |
| H | 6.8672767  | 2.9606106  | 0.0785932  |
| H | 0.5754056  | 3.8939717  | -4.9487414 |

**Cc** : C<sub>3</sub>N<sub>2</sub> cyclic intermediate with OH  
64

Energy = -1509.467417461

|   |            |            |            |
|---|------------|------------|------------|
| N | -2.3954230 | -0.5044354 | -0.5592375 |
| N | -1.4928805 | 0.3983838  | -0.9076391 |
| N | -1.7512118 | -1.2273099 | 0.3760815  |
| C | -0.3107563 | 0.2363663  | -0.2170578 |
| C | -1.8807476 | 1.4100755  | -1.8973006 |
| C | -2.4630845 | -2.3161104 | 0.9962797  |
| C | -0.4625869 | -0.8452179 | 0.6524413  |
| C | 0.9186185  | 1.0771485  | -0.4593487 |
| H | -1.9065955 | 2.3893355  | -1.4173905 |
| H | -2.8647911 | 1.1374143  | -2.2738576 |
| H | -1.1585076 | 1.4216951  | -2.7146250 |
| C | -3.5196722 | -2.0231723 | 1.8661891  |
| C | -2.0401565 | -3.6249074 | 0.7250963  |
| C | 0.6226461  | 2.5568588  | -0.3439271 |
| N | 1.5338671  | 0.6943426  | -1.7596037 |
| C | 2.1045470  | 0.6136861  | 0.5444235  |
| C | -4.1747689 | -3.1021127 | 2.4698272  |
| C | -3.9286877 | -0.6030908 | 2.1660092  |
| C | -2.7273652 | -4.6656873 | 1.3541029  |
| C | -0.8887238 | -3.9024909 | -0.2068713 |
| C | -0.0416498 | 3.0177045  | 0.8003605  |
| C | 0.9843047  | 3.4693852  | -1.3375972 |
| N | 2.4134857  | -0.3713314 | -1.5795949 |
| H | 0.8805431  | 0.4654015  | -2.5048316 |
| C | 2.7774292  | -0.4443884 | -0.3397847 |
| O | 1.6664884  | 0.1780428  | 1.7818393  |
| O | 2.9737295  | 1.6897802  | 0.8589701  |
| C | -3.7978472 | -4.4256374 | 2.2242976  |
| H | -4.9926481 | -2.8976445 | 3.1574445  |
| H | -4.4420828 | -0.1490940 | 1.3115850  |
| H | -4.6029823 | -0.5769466 | 3.0253829  |
| H | -3.0552983 | 0.0196700  | 2.3891920  |
| H | -2.4156293 | -5.6894544 | 1.1579777  |
| H | -0.7500071 | -4.9794215 | -0.3283589 |
| H | -1.0655557 | -3.4615073 | -1.1947790 |
| H | 0.0374642  | -3.4621344 | 0.1776293  |
| C | -0.3352519 | 4.3714052  | 0.9486689  |
| H | -0.3193488 | 2.3097755  | 1.5767095  |
| C | 0.6857248  | 4.8256119  | -1.1912125 |
| H | 1.4918440  | 3.1127512  | -2.2283945 |
| C | 3.7739873  | -1.4043565 | 0.1282823  |
| H | 0.8898788  | -0.4734386 | 1.6015727  |
| C | 3.9267966  | 2.0732981  | -0.1494282 |
| C | -4.5352947 | -5.5728175 | 2.8703782  |
| C | 0.0260607  | 5.2809389  | -0.0492801 |
| H | -0.8467379 | 4.7178773  | 1.8423694  |
| H | 0.9666217  | 5.5250185  | -1.9738709 |
| C | 4.1533592  | -2.4950192 | -0.6769239 |
| C | 4.3769169  | -1.2488315 | 1.3886434  |
| H | 4.6980718  | 1.3037915  | -0.2718260 |
| H | 3.4419754  | 2.2663907  | -1.1107266 |
| H | 4.3829610  | 2.9917805  | 0.2219278  |

|   |            |            |            |
|---|------------|------------|------------|
| H | -5.2252461 | -6.0400094 | 2.1564081  |
| H | -5.1220261 | -5.2317015 | 3.7279505  |
| H | -3.8407294 | -6.3487714 | 3.2081160  |
| H | -0.2089497 | 6.3356872  | 0.0624199  |
| C | 5.1124331  | -3.3991571 | -0.2343790 |
| H | 3.6829980  | -2.6218447 | -1.6471702 |
| C | 5.3397359  | -2.1578658 | 1.8261674  |
| H | 4.0862021  | -0.4150585 | 2.0177863  |
| C | 5.7112411  | -3.2350299 | 1.0200459  |
| H | 5.3933898  | -4.2383725 | -0.8649665 |
| H | 5.8000262  | -2.0236734 | 2.8012587  |
| H | 6.4586417  | -3.9441500 | 1.3649035  |

**CH<sub>3</sub>OH** : methanol by-product

6

Energy = -115.7944689170

|   |            |            |            |
|---|------------|------------|------------|
| C | 0.6808174  | -0.0362630 | -0.0002187 |
| H | 1.0175904  | -0.5772159 | -0.8940509 |
| H | 1.1229499  | 0.9624205  | -0.0015822 |
| H | 1.0163308  | -0.5741602 | 0.8959157  |
| O | -0.7457639 | 0.1497562  | -0.0015407 |
| H | -1.1570716 | -0.7289677 | 0.0016188  |

**CH<sub>3</sub>O<sup>-</sup>** : methoxy anion

5

Energy = -115.2609229215

|   |            |            |            |
|---|------------|------------|------------|
| C | 0.6035869  | -0.0136214 | -0.0003097 |
| H | 1.0302051  | -0.5713100 | -0.8851201 |
| H | 1.1806007  | 0.9574190  | -0.0015466 |
| H | 1.0289459  | -0.5683035 | 0.8869905  |
| O | -0.7514139 | 0.1203534  | -0.0014908 |

**C0** : C-like with Ph trans to pro-carbenic C-H

64

Energy = -1509.500528530

|   |            |            |            |
|---|------------|------------|------------|
| N | 2.4428388  | -1.7427951 | -0.6228161 |
| N | 1.1201688  | -1.4668052 | -0.6634385 |
| N | 2.9860815  | -0.6048825 | -0.2093349 |
| C | 0.8147985  | -0.1669171 | -0.2469966 |
| C | 0.2235711  | -2.4465075 | -1.2553285 |
| C | 4.4172518  | -0.5118496 | -0.0428128 |
| C | 2.0841161  | 0.3703523  | 0.0384058  |
| C | -0.4445982 | 0.4652373  | -0.2440051 |
| H | -0.3664937 | -2.9523105 | -0.4865567 |
| H | 0.8344053  | -3.1634118 | -1.8024775 |
| H | -0.4551459 | -1.9204762 | -1.9313957 |
| C | 5.0159110  | -1.2174260 | 1.0084801  |
| C | 5.1320461  | 0.2963230  | -0.9366902 |
| H | 2.3762039  | 1.3324718  | 0.4249725  |
| C | -1.7194643 | -0.1916311 | -0.0102140 |
| N | -0.3422089 | 1.8513613  | -0.3738009 |
| C | 6.4007456  | -1.0928006 | 1.1492574  |
| C | 4.2128275  | -2.0725346 | 1.9553329  |
| C | 6.5142659  | 0.3821203  | -0.7493097 |
| C | 4.4559320  | 1.0383390  | -2.0628218 |

|   |            |            |            |   |            |            |            |
|---|------------|------------|------------|---|------------|------------|------------|
| C | -1.8000220 | -1.3152427 | 0.8426812  | C | -0.3373865 | 0.6380043  | -0.2269909 |
| C | -2.9210854 | 0.2666914  | -0.5979701 | H | -0.4191769 | -2.7836513 | -0.1847766 |
| N | -1.2693739 | 2.6975169  | -0.0186029 | H | 0.7707086  | -3.1895124 | -1.4580142 |
| C | 7.1638360  | -0.2991886 | 0.2858610  | H | -0.4675463 | -1.9326306 | -1.7525741 |
| H | 6.8918031  | -1.6274795 | 1.9591068  | C | 5.0079943  | -1.0813203 | 1.1943483  |
| H | 3.9007574  | -3.0057539 | 1.4749150  | C | 5.2668637  | -0.0345729 | -1.0240401 |
| H | 4.8099507  | -2.3216142 | 2.8355338  | H | 2.5652866  | 1.4515100  | 0.1853475  |
| H | 3.3052502  | -1.5564708 | 2.2866838  | C | -0.4580557 | 2.0799371  | -0.3760073 |
| H | 7.0956791  | 0.9927989  | -1.4362112 | N | -1.4293359 | -0.1611304 | 0.1068426  |
| H | 5.1990586  | 1.3726797  | -2.7902609 | C | 6.3973713  | -1.0435610 | 1.3407385  |
| H | 3.7252390  | 0.4067415  | -2.5781742 | C | 4.1246602  | -1.6535200 | 2.2734113  |
| H | 3.9216895  | 1.9230205  | -1.6966967 | C | 6.6501724  | -0.0240223 | -0.8255330 |
| C | -3.0071540 | -1.9766148 | 1.0586081  | C | 4.6582071  | 0.5014310  | -2.2953026 |
| H | -0.9062268 | -1.6498610 | 1.3639165  | C | 0.4537365  | 2.8041942  | -1.1773387 |
| C | -4.1241057 | -0.3901840 | -0.3709671 | C | -1.4666681 | 2.8210360  | 0.2836583  |
| H | -2.8983207 | 1.1378876  | -1.2432632 | N | -2.6683214 | 0.1360710  | -0.1886028 |
| C | -1.0988250 | 4.0240805  | -0.2380647 | C | 7.2314029  | -0.5186524 | 0.3473092  |
| C | 8.6528836  | -0.1604544 | 0.4821963  | H | 6.8355715  | -1.4343008 | 2.2562547  |
| C | -4.1802691 | -1.5221566 | 0.4525686  | H | 3.7201335  | -2.6263313 | 1.9740463  |
| H | -3.0335388 | -2.8378308 | 1.7214980  | H | 4.6934035  | -1.7866733 | 3.1963924  |
| H | -5.0300520 | -0.0201175 | -0.8445782 | H | 3.2735142  | -0.9964433 | 2.4822316  |
| C | -2.2719836 | 4.8454509  | 0.1168327  | H | 7.2867390  | 0.3745933  | -1.6121554 |
| C | 0.1181323  | 4.5345930  | -0.8201749 | H | 5.4297421  | 0.6314144  | -3.0574681 |
| H | 8.8746529  | 0.6892459  | 1.1402747  | H | 3.8913476  | -0.1738391 | -2.6882816 |
| H | 9.1618233  | 0.0180240  | -0.4695321 | H | 4.1840391  | 1.4756659  | -2.1277237 |
| H | 9.0758679  | -1.0565069 | 0.9454440  | C | 0.3872045  | 4.1908353  | -1.2833019 |
| H | -5.1244199 | -2.0297031 | 0.6278536  | H | 1.2076347  | 2.2646504  | -1.7446539 |
| C | -2.1876591 | 6.1939787  | 0.5191916  | C | -1.5326632 | 4.2048895  | 0.1686098  |
| C | -3.5527541 | 4.2512203  | 0.1047583  | H | -2.1958945 | 2.3017624  | 0.8946881  |
| O | 1.1302631  | 3.8403983  | -1.0758887 | C | -3.6803722 | -0.6429128 | 0.2554307  |
| O | 0.1068741  | 5.8632772  | -1.1373562 | C | 8.7255757  | -0.4646416 | 0.5468426  |
| C | -3.3288006 | 6.9100368  | 0.8790096  | C | -0.6057640 | 4.9074827  | -0.6102876 |
| H | -1.2216625 | 6.6823666  | 0.5585492  | H | 1.1047639  | 4.7127753  | -1.9115752 |
| C | -4.6888698 | 4.9679783  | 0.4700089  | H | -2.3150087 | 4.7440516  | 0.6971831  |
| H | -3.6382848 | 3.2106868  | -0.1910967 | C | -5.0238463 | -0.1360533 | -0.0900342 |
| C | 1.3303437  | 6.3605278  | -1.7274320 | C | -3.4306647 | -1.8190739 | 1.0520669  |
| C | -4.5889167 | 6.3076938  | 0.8568000  | H | 9.0154868  | 0.4850453  | 1.0140487  |
| H | -3.2284378 | 7.9476182  | 1.1883482  | H | 9.2544709  | -0.5374489 | -0.4079585 |
| H | -5.6604857 | 4.4804480  | 0.4440177  | H | 9.0664960  | -1.2723211 | 1.2009578  |
| H | 2.1728747  | 6.1998836  | -1.0503515 | H | -0.6660272 | 5.9881032  | -0.7007981 |
| H | 1.5263062  | 5.8570750  | -2.6773442 | C | -6.1408938 | -0.9707008 | -0.2913593 |
| H | 1.1547981  | 7.4247675  | -1.8831762 | C | -5.2042574 | 1.2503544  | -0.2802526 |
| H | -5.4755140 | 6.8704831  | 1.1354719  | O | -2.2891392 | -2.2615944 | 1.3250513  |
| H | 0.5143060  | 2.2732294  | -0.7831381 | O | -4.5387581 | -2.4311773 | 1.5598325  |

C : mNHO-like with an N-H bond

64

Energy = -1509.501327036

|   |           |            |            |   |            |            |            |
|---|-----------|------------|------------|---|------------|------------|------------|
| N | 2.4362270 | -1.7337976 | -0.4469405 | H | -4.3530097 | 1.9086524  | -0.1390029 |
| N | 1.1303944 | -1.3790924 | -0.5380025 | C | -4.2778495 | -3.6027174 | 2.3680399  |
| N | 3.0464778 | -0.5857388 | -0.1753199 | C | -7.5406044 | 0.9358755  | -0.8351970 |
| C | 0.9084535 | -0.0175532 | -0.2907720 | H | -8.2196831 | -1.1106186 | -0.8080447 |
| C | 0.1859641 | -2.3891198 | -1.0059950 | H | -6.5461681 | 2.8505156  | -0.7808160 |
| C | 4.4798527 | -0.5681977 | 0.0036216  | H | -3.7405578 | -4.3546741 | 1.7849314  |
| C | 2.2108609 | 0.4678119  | -0.0705022 | H | -3.6898506 | -3.3339253 | 3.2491172  |
|   |           |            |            | H | -5.2626020 | -3.9682426 | 2.6578952  |



H -8.5068318 1.3454643 -1.1162997  
H -1.3052254 -1.0256391 0.6658925

**Cn** : C-like but with N-H bond to the other N  
64

Energy = -1509.499145624

N -0.3575821 -1.5469328 -0.6399583  
N -1.6242670 -1.1313151 -0.4249468  
N 0.3759132 -0.6780568 0.0450076  
C -1.6997714 0.0059026 0.3731811  
C -2.7090454 -1.9476508 -0.9574933  
C 1.8163202 -0.7951815 0.0410293  
C -0.3550933 0.2720170 0.6685232  
C -2.8620529 0.6859092 0.8266556  
H -2.2862457 -2.9159590 -1.2217429  
H -3.1532318 -1.4726606 -1.8351616  
H -3.4710310 -2.0600526 -0.1843606  
C 2.4459592 -1.2466619 1.2081279  
C 2.5085964 -0.4278269 -1.1189739  
H 0.0937986 1.0569060 1.2515765  
C -4.1569226 0.6327863 0.1209913  
H -4.4530698 2.2763620 1.8713374  
C 3.8400971 -1.3312864 1.1843997  
C 1.6647056 -1.6277548 2.4404410  
C 3.9021726 -0.5302833 -1.0850262  
C 1.7930728 0.0651189 -2.3507200  
C -5.3649521 0.4144626 0.8131089  
C -4.2208017 0.8554198 -1.2682830  
C 4.5826853 -0.9810087 0.0508615  
H 4.3554292 -1.6817670 2.0756618  
H 0.7987435 -2.2490159 2.1903740  
H 2.3014373 -2.1829638 3.1326041  
H 1.2901940 -0.7419032 2.9670152  
H 4.4674000 -0.2423696 -1.9683739  
H 2.5053162 0.5140711 -3.0464689  
H 1.2818646 -0.7565954 -2.8635544  
H 1.0351743 0.8153668 -2.0998018  
C -6.5839678 0.4099326 0.1383097  
H -5.3452489 0.2241719 1.8828535  
C -5.4389767 0.8322663 -1.9440595  
H -3.3034109 1.0608031 -1.8146594  
C 6.0855723 -1.1078263 0.0490309  
C -6.6276177 0.6127983 -1.2433373  
H -7.5020356 0.2340259 0.6920466  
H -5.4623945 1.0022093 -3.0170115  
H 6.5345126 -0.4718624 -0.7189232  
H 6.3823204 -2.1435199 -0.1588799  
H 6.5060004 -0.8353784 1.0218982  
H -7.5786264 0.6049252 -1.7677868  
N -2.6017558 1.4806546 1.8960617  
N -3.5281100 2.2948709 2.3161207  
C -3.4552001 3.1589180 3.4079099  
C -2.1974797 3.5264723 4.0344631  
C -4.7266114 3.6819850 3.8083211  
C -2.1681087 4.1087070 5.3280754

C -0.9461690 3.3421532 3.3930013  
O -4.9672900 4.5422469 4.6661064  
O -5.7762664 3.1111704 3.0807132  
C -0.9702001 4.4828438 5.9277290  
H -3.1030468 4.2687396 5.8497111  
C 0.2465531 3.7264331 4.0004704  
H -0.9199097 2.8989746 2.4069955  
C -7.0738802 3.6796156 3.3389787  
C 0.2533018 4.2979044 5.2747744  
H -0.9933982 4.9218741 6.9224769  
H 1.1835030 3.5771013 3.4681597  
H -7.3488583 3.5452430 4.3883659  
H -7.0845331 4.7456095 3.0949036  
H -7.7587188 3.1322756 2.6900570  
H 1.1864857 4.5883204 5.7491142

**1a** : diazo N=N=CPhE reactant

21

Energy = -608.0606453889

C -3.7123415 -0.4677389 -0.0366591  
C -2.7894039 -1.5106218 -0.1220552  
C -3.2467282 0.8429878 0.0899063  
H -3.1342963 -2.5362565 -0.2207195  
H -3.9487840 1.6691223 0.1578778  
C -1.4182754 -1.2604762 -0.0827265  
C -1.8807455 1.1058600 0.1297258  
H -0.7119724 -2.0774899 -0.1497256  
H -1.5484143 2.1354251 0.2274702  
C -0.9436005 0.0580308 0.0439316  
H -4.7785315 -0.6713994 -0.0679841  
C 0.4999317 0.3458371 0.0871448  
C 1.6071948 -0.6080887 -0.0099115  
O 1.4852902 -1.8170552 -0.1453481  
O 2.8082248 0.0200097 0.0691635  
C 3.9657566 -0.8536792 -0.0206454  
H 3.9645175 -1.3752575 -0.9799026  
H 4.8234324 -0.1879193 0.0605237  
H 3.9514958 -1.5754037 0.7985403  
N 0.8655004 1.6071566 0.2284977  
N 1.1542149 2.6977017 0.3503636

**7** : more electron-deficient diazo

22

Energy = -571.1478019652

C -0.2984736 0.4255446 1.3117803  
C -0.3364632 1.0851734 -0.0000528  
O -0.2844211 1.0575993 2.3666157  
C -0.2982185 -1.0877813 1.2539403  
C -0.2983962 0.4255057 -1.3118451  
N -0.3709655 2.4113501 -0.0000178  
H -1.3518656 -1.4027229 1.2834150  
H 0.1754689 -1.4513537 2.1710542  
C 0.3762926 -1.6817735 0.0000023  
O -0.2841736 1.0575103 -2.3667132  
C -0.2982663 -1.0878160 -1.2539303

|   |            |            |            |
|---|------------|------------|------------|
| N | -0.4079894 | 3.5350706  | 0.0002009  |
| C | 1.8815284  | -1.3602150 | -0.0000357 |
| C | 0.1765871  | -3.2041893 | 0.0000271  |
| H | -1.3519506 | -1.4026503 | -1.2833391 |
| H | 0.1753034  | -1.4515092 | -2.1710562 |
| H | 2.3616168  | -1.7858141 | 0.8874958  |
| H | 2.3615221  | -1.7855980 | -0.8877222 |
| H | 2.0688561  | -0.2802684 | 0.0000992  |
| H | -0.8890941 | -3.4593583 | -0.0001076 |
| H | 0.6381899  | -3.6517733 | -0.8871333 |
| H | 0.6379629  | -3.6517357 | 0.8873228  |

**8** : stable Cn-like adduct of mNHO **2a** and **7**  
65

Energy = -1472.604921759

|   |            |            |            |
|---|------------|------------|------------|
| N | -3.1484700 | 1.5709838  | 0.6710580  |
| N | -1.9200064 | 2.1008271  | 0.7456784  |
| N | -2.9454076 | 0.3397600  | 0.2226953  |
| C | -0.9264697 | 1.2179742  | 0.3455298  |
| C | -1.8103429 | 3.5066747  | 1.1522031  |
| C | -4.0686736 | -0.5471759 | 0.0206691  |
| C | -1.6366173 | 0.0651930  | 0.0028126  |
| C | 0.4815576  | 1.4607185  | 0.3071710  |
| H | -2.7666987 | 3.7775374  | 1.5987401  |
| H | -1.6124894 | 4.1139895  | 0.2660635  |
| H | -0.9729744 | 3.6329961  | 1.8386484  |
| C | -4.2706462 | -1.5790564 | 0.9457684  |
| C | -4.8849693 | -0.3377779 | -1.0968979 |
| H | -1.3065313 | -0.8860058 | -0.3782169 |
| C | 1.3948792  | 0.3437023  | -0.0459998 |
| H | 2.8608748  | 2.3380729  | 0.3798003  |
| C | -5.3554958 | -2.4295038 | 0.7199388  |
| C | -3.3650345 | -1.7696797 | 2.1362832  |
| C | -5.9539214 | -1.2204391 | -1.2746575 |
| C | -4.6273464 | 0.7833316  | -2.0706752 |
| C | 2.3221547  | 0.4797361  | -1.0931560 |
| C | 1.3692917  | -0.8605109 | 0.6771065  |
| C | -6.2064534 | -2.2651444 | -0.3792220 |
| H | -5.5390520 | -3.2378706 | 1.4239181  |
| H | -3.1847139 | -0.8241035 | 2.6580549  |
| H | -3.8127112 | -2.4731184 | 2.8414619  |
| H | -2.3902598 | -2.1710257 | 1.8350874  |
| H | -6.6005501 | -1.0880295 | -2.1388989 |
| H | -5.2380355 | 0.6531947  | -2.9666681 |
| H | -4.8721930 | 1.7538812  | -1.6256706 |
| H | -3.5745847 | 0.8180451  | -2.3717208 |
| C | 3.1970223  | -0.5599310 | -1.4065859 |
| H | 2.3489351  | 1.3982093  | -1.6734278 |
| C | 2.2362293  | -1.9034675 | 0.3554312  |
| H | 0.6740225  | -0.9709139 | 1.5055412  |
| C | -7.3866589 | -3.1824231 | -0.5797583 |
| C | 3.1544570  | -1.7554265 | -0.6868520 |
| H | 3.9070662  | -0.4378803 | -2.2194483 |
| H | 2.2035851  | -2.8276047 | 0.9256983  |
| H | -7.6986545 | -3.2010982 | -1.6276513 |

|   |            |            |            |
|---|------------|------------|------------|
| H | -8.2417888 | -2.8410298 | 0.0170861  |
| H | -7.1522033 | -4.2032563 | -0.2633653 |
| H | 3.8346865  | -2.5653579 | -0.9337186 |
| N | 0.8661575  | 2.6918974  | 0.6345525  |
| N | 2.1308301  | 2.9893058  | 0.7009749  |
| C | 1.9376500  | 5.1741271  | 1.8785634  |
| C | 2.6440771  | 4.2423393  | 1.0651591  |
| O | 0.8061958  | 4.9740257  | 2.3850224  |
| C | 2.6541811  | 6.4876285  | 2.1886500  |
| C | 3.9993072  | 4.4123334  | 0.6553771  |
| H | 3.0939931  | 6.3839845  | 3.1924908  |
| H | 1.8854845  | 7.2662584  | 2.2625644  |
| C | 3.7574254  | 6.8993728  | 1.1978263  |
| O | 4.6110827  | 3.5067659  | 0.0246966  |
| C | 4.7079986  | 5.7005015  | 1.0273393  |
| C | 3.1421553  | 7.2915135  | -0.1579216 |
| C | 4.5346368  | 8.0983943  | 1.7613366  |
| H | 5.2464605  | 5.5298415  | 1.9721192  |
| H | 5.4656557  | 5.9000584  | 0.2606012  |
| H | 2.4655349  | 8.1453345  | -0.0363963 |
| H | 3.9280621  | 7.5763919  | -0.8671231 |
| H | 2.5730858  | 6.4627267  | -0.5913506 |
| H | 4.9894517  | 7.8498591  | 2.7274559  |
| H | 5.3340757  | 8.4004307  | 1.0739657  |
| H | 3.8691135  | 8.9577715  | 1.9070545  |

**8a** : less stable C-like adduct of **2a** and **7**  
65

Energy = -1472.595698912

|   |            |            |            |
|---|------------|------------|------------|
| N | -2.8510031 | 1.1428160  | 1.5857170  |
| N | -1.5790991 | 1.4599475  | 1.8795444  |
| N | -2.7326006 | 0.2273299  | 0.6277112  |
| C | -0.6488958 | 0.7845011  | 1.0924515  |
| C | -1.3335672 | 2.3665071  | 3.0002864  |
| C | -3.9195528 | -0.3570803 | 0.0463501  |
| C | -1.4503352 | -0.0311256 | 0.2896188  |
| C | 0.7682154  | 0.9594792  | 1.1209175  |
| H | -2.2270381 | 2.3596158  | 3.6225506  |
| H | -1.1194360 | 3.3780813  | 2.6427713  |
| H | -0.4758429 | 1.9845102  | 3.5576922  |
| C | -4.2104918 | -1.6936356 | 0.3483963  |
| C | -4.7051826 | 0.4355084  | -0.7989754 |
| H | -1.1938349 | -0.7174368 | -0.4994491 |
| C | 1.6685927  | -0.1462137 | 0.8209266  |
| H | 0.4826773  | 3.0530402  | 1.3007696  |
| C | -5.3565628 | -2.2399589 | -0.2338575 |
| C | -3.3344414 | -2.5157005 | 1.2601979  |
| C | -5.8384332 | -0.1645350 | -1.3551683 |
| C | -4.3507676 | 1.8676084  | -1.1079578 |
| C | 2.9970455  | 0.0439437  | 0.3714988  |
| C | 1.2162394  | -1.4797440 | 0.9634774  |
| C | -6.1815199 | -1.4930751 | -1.0828342 |
| H | -5.6096691 | -3.2744711 | -0.0137739 |
| H | -3.0442599 | -1.9539374 | 2.1538897  |
| H | -3.8622227 | -3.4181341 | 1.5760062  |

|   |            |            |            |
|---|------------|------------|------------|
| H | -2.4143649 | -2.8280291 | 0.7518372  |
| H | -6.4632770 | 0.4231004  | -2.0235861 |
| H | -4.9478009 | 2.2304341  | -1.9474012 |
| H | -4.5413131 | 2.5147595  | -0.2452900 |
| H | -3.2914493 | 1.9706751  | -1.3672600 |
| C | 3.7972483  | -1.0463801 | 0.0390803  |
| H | 3.3990771  | 1.0467982  | 0.3088916  |
| C | 2.0238446  | -2.5613618 | 0.6311883  |
| H | 0.2258314  | -1.6684468 | 1.3678617  |
| C | -7.4282326 | -2.1031221 | -1.6727007 |
| C | 3.3223846  | -2.3550685 | 0.1564451  |
| H | 4.8106756  | -0.8680167 | -0.3111804 |
| H | 1.6428204  | -3.5712334 | 0.7584952  |
| H | -7.7436584 | -1.5658371 | -2.5712902 |
| H | -8.2532245 | -2.0601818 | -0.9505900 |
| H | -7.2704416 | -3.1552926 | -1.9282541 |
| H | 3.9578644  | -3.1986912 | -0.0964875 |
| N | 1.1750972  | 2.2514001  | 1.3443331  |
| N | 2.4028278  | 2.6434224  | 1.5315547  |
| C | 1.5392221  | 4.9710262  | 1.5696323  |
| C | 2.5849941  | 4.0085150  | 1.6495885  |
| O | 0.3142321  | 4.6399695  | 1.3985569  |
| C | 1.8548436  | 6.4473394  | 1.6936732  |
| C | 3.9728830  | 4.4191990  | 1.8170402  |
| H | 1.7193897  | 6.7286975  | 2.7497540  |
| H | 1.0982599  | 6.9962301  | 1.1206846  |
| C | 3.2774061  | 6.8310074  | 1.2530361  |
| O | 4.9180399  | 3.6133535  | 1.8353528  |
| C | 4.2510001  | 5.9053077  | 2.0015491  |
| C | 3.4341538  | 6.6540264  | -0.2677175 |
| C | 3.5576475  | 8.2937201  | 1.6260198  |
| H | 4.1880132  | 6.1204003  | 3.0796144  |
| H | 5.2874888  | 6.0867649  | 1.6972160  |
| H | 2.7376082  | 7.3091735  | -0.8033641 |
| H | 4.4532672  | 6.9100752  | -0.5787883 |
| H | 3.2347246  | 5.6210657  | -0.5727394 |
| H | 3.4571289  | 8.4473128  | 2.7068401  |
| H | 4.5744772  | 8.5793523  | 1.3322536  |
| H | 2.8553764  | 8.9650009  | 1.1173291  |

**D** : mNHO-like via N-N rotation of **C**  
64

Energy = -1509.493769271

|   |            |            |           |
|---|------------|------------|-----------|
| N | 1.9247031  | -1.5404413 | 1.1754653 |
| N | 0.6681441  | -1.0650781 | 1.3138373 |
| N | 2.5565121  | -0.5729935 | 0.5348801 |
| C | 0.4926668  | 0.2201886  | 0.7835708 |
| C | -0.2798018 | -1.9210329 | 2.0248970 |
| C | 3.9611472  | -0.7160790 | 0.2266260 |
| C | 1.7760785  | 0.5005389  | 0.2658839 |
| C | -0.6931236 | 0.9779866  | 0.8132386 |
| H | -0.5053015 | -1.5019034 | 3.0062561 |
| H | 0.2003930  | -2.8940174 | 2.1298774 |
| H | -1.1930838 | -2.0098215 | 1.4378574 |
| C | 4.8881666  | -0.4576411 | 1.2413225 |

|   |            |            |            |
|---|------------|------------|------------|
| C | 4.3250199  | -1.0946609 | -1.0724189 |
| H | 2.1833607  | 1.3830252  | -0.1940566 |
| C | -0.8453847 | 2.2700138  | 0.1635926  |
| N | -1.6644413 | 0.5973922  | 1.7908022  |
| C | 6.2424810  | -0.5893759 | 0.9156219  |
| C | 4.4528195  | -0.0579843 | 2.6279194  |
| C | 5.6893728  | -1.2125053 | -1.3430292 |
| C | 3.2906152  | -1.3814472 | -2.1304911 |
| C | -1.8277543 | 3.1848118  | 0.6117361  |
| C | -0.0911285 | 2.6591652  | -0.9690153 |
| N | -2.9230207 | 0.1961549  | 1.4920004  |
| C | 6.6606089  | -0.9638349 | -0.3644001 |
| H | 6.9856805  | -0.3900066 | 1.6841529  |
| H | 3.9885014  | -0.9016100 | 3.1503366  |
| H | 5.3116813  | 0.2779844  | 3.2130726  |
| H | 3.7158907  | 0.7518933  | 2.5968718  |
| H | 5.9984824  | -1.5078236 | -2.3432004 |
| H | 3.7742791  | -1.6651412 | -3.0674377 |
| H | 2.6307982  | -2.1992320 | -1.8204460 |
| H | 2.6594007  | -0.5069976 | -2.3220065 |
| C | -2.0046265 | 4.4226692  | 0.0016696  |
| H | -2.4670206 | 2.9125330  | 1.4461854  |
| C | -0.2698398 | 3.8990342  | -1.5745240 |
| H | 0.6062723  | 1.9608574  | -1.4189988 |
| C | -3.2248863 | -0.2320009 | 0.3055769  |
| C | 8.1272132  | -1.0972357 | -0.6917005 |
| C | -1.2195629 | 4.8031898  | -1.0907366 |
| H | -2.7673416 | 5.0974779  | 0.3835581  |
| H | 0.3287045  | 4.1541399  | -2.4461236 |
| C | -4.6022398 | -0.7002645 | 0.0631305  |
| C | -2.2848381 | -0.2884854 | -0.8799471 |
| H | 8.4096139  | -0.4147970 | -1.5015020 |
| H | 8.3605570  | -2.1140273 | -1.0277627 |
| H | 8.7475604  | -0.8721677 | 0.1797184  |
| H | -1.3579499 | 5.7704553  | -1.5651512 |
| C | -4.9907619 | -1.1927915 | -1.1954080 |
| C | -5.5629936 | -0.6773709 | 1.0935667  |
| O | -2.3292567 | 0.4605889  | -1.8416169 |
| O | -1.5573992 | -1.4459137 | -0.8738377 |
| C | -6.2916661 | -1.6461209 | -1.4164155 |
| H | -4.2768324 | -1.2148084 | -2.0132294 |
| C | -6.8581984 | -1.1296394 | 0.8693509  |
| H | -5.2718341 | -0.2983080 | 2.0673334  |
| C | -0.7034506 | -1.6258924 | -2.0306349 |
| C | -7.2334578 | -1.6181497 | -0.3879123 |
| H | -6.5672392 | -2.0206730 | -2.3985533 |
| H | -7.5828501 | -1.1015986 | 1.6790190  |
| H | -1.3079299 | -1.7205611 | -2.9356646 |
| H | -0.0298408 | -0.7718247 | -2.1286199 |
| H | -0.1491375 | -2.5433263 | -1.8364314 |
| H | -8.2465616 | -1.9702212 | -0.5601660 |
| H | -1.6622655 | 1.0787439  | 2.6843699  |

**E**: contact ion pair of OMe<sup>-</sup> anion  
64

Energy = -1509.480166836

|   |            |            |            |
|---|------------|------------|------------|
| N | 2.4190047  | 1.2034485  | -1.5465088 |
| N | 1.1115325  | 1.4342794  | -1.6446944 |
| N | 2.5193459  | 0.4115866  | -0.4774093 |
| C | 0.3755960  | 0.7971906  | -0.6864160 |
| C | 0.6411720  | 2.3123770  | -2.7223332 |
| C | 3.8206418  | -0.0417726 | -0.0406163 |
| C | 1.3136907  | 0.1320637  | 0.0775813  |
| C | -1.0988212 | 0.8606430  | -0.5054609 |
| H | 0.0353988  | 1.7299275  | -3.4156008 |
| H | 1.5228670  | 2.7168262  | -3.2153449 |
| H | 0.0497345  | 3.1165764  | -2.2812913 |
| C | 4.1825725  | -1.3692045 | -0.3056099 |
| C | 4.6425204  | 0.8673649  | 0.6339173  |
| H | 1.1827884  | -0.4997910 | 0.9401227  |
| C | -1.5039558 | 1.9780143  | 0.4427556  |
| N | -1.8331446 | 0.8740100  | -1.7760183 |
| C | -1.5930281 | -0.5870114 | 0.1276227  |
| C | 5.4418945  | -1.7804544 | 0.1344581  |
| C | 3.2579742  | -2.3156772 | -1.0274248 |
| C | 5.8919081  | 0.3999442  | 1.0532965  |
| C | 4.2068798  | 2.2847374  | 0.9045481  |
| C | -0.7071200 | 2.3087110  | 1.5474020  |
| C | -2.7192721 | 2.6544419  | 0.2717298  |
| N | -3.0331397 | 0.1332490  | -1.6291383 |
| H | -2.0947604 | 1.8072522  | -2.0899187 |
| C | -2.9404125 | -0.6711768 | -0.6215262 |
| O | -1.4700322 | -0.7427078 | 1.3856373  |
| C | 6.3078430  | -0.9131292 | 0.8126763  |
| H | 5.7527157  | -2.8039828 | -0.0619956 |
| H | 2.8255249  | -1.8546097 | -1.9210943 |
| H | 3.7986940  | -3.2155186 | -1.3279914 |
| H | 2.4255156  | -2.6205351 | -0.3835180 |
| H | 6.5519493  | 1.0814058  | 1.5846457  |
| H | 4.8999609  | 2.7674328  | 1.5966564  |
| H | 4.1785968  | 2.8728138  | -0.0192837 |
| H | 3.2036475  | 2.3167224  | 1.3441239  |
| C | -1.0991216 | 3.3040696  | 2.4411402  |
| H | 0.2261685  | 1.7829042  | 1.7193613  |
| C | -3.1147097 | 3.6482959  | 1.1676638  |
| H | -3.3791864 | 2.3908826  | -0.5492842 |
| C | -4.0150322 | -1.6151275 | -0.3092901 |
| C | 7.6626097  | -1.3913718 | 1.2717182  |
| C | -2.3044973 | 3.9828250  | 2.2536207  |
| H | -0.4625069 | 3.5464503  | 3.2878073  |
| H | -4.0623643 | 4.1578641  | 1.0159986  |
| C | -5.0568536 | -1.8547815 | -1.2265609 |
| C | -4.0221810 | -2.3022174 | 0.9171820  |
| H | 8.2729990  | -1.7061466 | 0.4174507  |
| H | 7.5655848  | -2.2560927 | 1.9377464  |
| H | 8.1991713  | -0.6028009 | 1.8055017  |
| H | -2.6108321 | 4.7597411  | 2.9483932  |
| C | -6.0769751 | -2.7493209 | -0.9204730 |
| H | -5.0480545 | -1.3349729 | -2.1797828 |
| C | -5.0465773 | -3.2000322 | 1.2174145  |

|   |            |            |            |
|---|------------|------------|------------|
| H | -3.2157302 | -2.1074314 | 1.6171185  |
| C | -6.0778194 | -3.4272909 | 0.3043397  |
| H | -6.8726237 | -2.9265061 | -1.6395968 |
| H | -5.0399714 | -3.7235168 | 2.1700838  |
| H | -6.8743643 | -4.1280387 | 0.5397654  |
| O | -0.7329792 | -1.5676046 | -0.7320936 |
| C | -0.7172528 | -2.8807701 | -0.1866954 |
| H | -0.5684594 | -2.8482208 | 0.8995631  |
| H | -1.6521899 | -3.4210656 | -0.3990711 |
| H | 0.1134997  | -3.4155817 | -0.6591153 |

**F** : MIC-like via C5 C-H proton transfer to N  
58

Energy = -1393.666006623

|   |            |            |            |
|---|------------|------------|------------|
| N | 1.8820519  | -1.6460887 | 0.6402155  |
| N | 0.6177481  | -1.2715525 | 0.6698367  |
| N | 2.5187145  | -0.4942207 | 0.3386706  |
| C | 0.4750635  | 0.0714748  | 0.3885693  |
| C | -0.3977435 | -2.2742698 | 1.0064167  |
| C | 3.9559423  | -0.5407191 | 0.2363862  |
| C | 1.7387905  | 0.6285715  | 0.1657597  |
| C | -0.8701665 | 0.7323166  | 0.4121508  |
| H | -1.0514760 | -1.8649329 | 1.7786691  |
| H | 0.1190082  | -3.1545799 | 1.3838293  |
| H | -0.9725848 | -2.5285297 | 0.1145241  |
| C | 4.7141130  | -0.6196029 | 1.4096394  |
| C | 4.5345438  | -0.4757531 | -1.0377806 |
| C | -0.8741731 | 2.1085696  | -0.2697242 |
| N | -1.4266610 | 0.7774028  | 1.7668468  |
| C | 6.1068469  | -0.6412291 | 1.2787262  |
| C | 4.0593726  | -0.6592088 | 2.7670494  |
| C | 5.9291649  | -0.5001077 | -1.1156043 |
| C | 3.6828894  | -0.3766578 | -2.2767558 |
| C | -1.5296733 | 3.2043358  | 0.2945272  |
| C | -0.2803172 | 2.2324464  | -1.5315621 |
| N | -2.7205356 | 0.4441839  | 1.8144433  |
| C | 6.7309477  | -0.5868337 | 0.0289089  |
| H | 6.7157420  | -0.6924149 | 2.1790196  |
| H | 3.5457293  | -1.6128737 | 2.9315212  |
| H | 4.8065765  | -0.5311230 | 3.5540270  |
| H | 3.3097785  | 0.1341549  | 2.8636920  |
| H | 6.3985188  | -0.4482337 | -2.0959049 |
| H | 4.3097371  | -0.3584863 | -3.1714611 |
| H | 2.9946162  | -1.2265729 | -2.3518068 |
| H | 3.0694591  | 0.5307616  | -2.2497770 |
| C | -1.5640190 | 4.4262639  | -0.3820664 |
| H | -2.0216044 | 3.1198425  | 1.2583882  |
| C | -0.3189863 | 3.4508466  | -2.2041935 |
| H | 0.2147172  | 1.3782623  | -1.9780784 |
| C | -3.1178937 | -0.0747855 | 0.6636325  |
| C | 8.2349421  | -0.6368140 | -0.0875226 |
| C | -0.9562484 | 4.5542668  | -1.6299983 |
| H | -2.0705584 | 5.2736271  | 0.0707970  |
| H | 0.1519572  | 3.5396298  | -3.1790558 |
| C | -4.4623521 | -0.6213991 | 0.4868866  |

|   |            |            |            |
|---|------------|------------|------------|
| C | -2.0156008 | -0.0593426 | -0.3083368 |
| H | 8.5941918  | 0.0435122  | -0.8663547 |
| H | 8.5690040  | -1.6470357 | -0.3560035 |
| H | 8.7131785  | -0.3681211 | 0.8587700  |
| H | -0.9816412 | 5.5046462  | -2.1553843 |
| C | -4.9030972 | -1.0474315 | -0.7786754 |
| C | -5.3412692 | -0.7224070 | 1.5824807  |
| O | -1.9377539 | -0.5242967 | -1.4354553 |
| C | -6.1912878 | -1.5570350 | -0.9404896 |
| H | -4.2325175 | -0.9786954 | -1.6275965 |
| C | -6.6249750 | -1.2291857 | 1.4121860  |
| H | -5.0058912 | -0.4005565 | 2.5634223  |
| C | -7.0572547 | -1.6499301 | 0.1496670  |
| H | -6.5178345 | -1.8817238 | -1.9244824 |
| H | -7.2919045 | -1.3005673 | 2.2669326  |
| H | -8.0595583 | -2.0482105 | 0.0205127  |
| H | -1.1048980 | 1.4354614  | 2.4673650  |

**Gc** : ketene-like with a cis N=N bond  
58

Energy = -1393.651126372

|   |            |            |            |
|---|------------|------------|------------|
| N | -0.5969350 | -1.9002582 | 0.4811346  |
| N | -1.7644580 | -1.9468458 | 1.1429166  |
| N | -0.1188208 | -0.6958189 | 0.7645581  |
| C | -2.0367246 | -0.7878051 | 1.8573686  |
| C | -2.5721638 | -3.1586074 | 0.9966815  |
| C | 1.1427179  | -0.2698377 | 0.2047369  |
| C | -0.9274938 | 0.0185015  | 1.5826739  |
| C | -3.1889708 | -0.5106083 | 2.6579604  |
| H | -2.1430734 | -3.7238264 | 0.1692090  |
| H | -3.6000629 | -2.8661988 | 0.7839643  |
| H | -2.5526435 | -3.7353501 | 1.9208925  |
| C | 2.3206092  | -0.8363942 | 0.7065561  |
| C | 1.1205820  | 0.7082712  | -0.7979113 |
| H | -0.6709084 | 1.0073529  | 1.9214298  |
| C | -3.3455308 | 0.8966501  | 3.1082002  |
| C | 3.5245154  | -0.3858974 | 0.1578684  |
| C | 2.3017601  | -1.8792609 | 1.7946027  |
| C | 2.3531747  | 1.1191399  | -1.3114066 |
| C | -0.1692268 | 1.3004267  | -1.3085094 |
| C | -3.3033023 | 1.9527338  | 2.1830811  |
| C | -3.5019177 | 1.2074768  | 4.4684619  |
| C | 3.5611440  | 0.5843376  | -0.8494559 |
| H | 4.4561958  | -0.8008232 | 0.5353568  |
| H | 1.9541766  | -2.8434981 | 1.4084627  |
| H | 3.3051921  | -2.0152466 | 2.2039434  |
| H | 1.6300855  | -1.5933753 | 2.6112735  |
| H | 2.3658064  | 1.8748506  | -2.0933692 |
| H | 0.0058391  | 1.8314783  | -2.2466199 |
| H | -0.9244334 | 0.5273631  | -1.4839889 |
| H | -0.5890664 | 2.0161319  | -0.5917656 |
| C | -3.4231158 | 3.2764424  | 2.5986847  |
| H | -3.2185772 | 1.7247742  | 1.1240029  |
| C | -3.6358130 | 2.5311340  | 4.8848976  |
| H | -3.5154184 | 0.4044908  | 5.1990861  |

|   |            |            |            |
|---|------------|------------|------------|
| C | 4.8745087  | 1.0289780  | -1.4427780 |
| C | -3.5980442 | 3.5708844  | 3.9526730  |
| H | -3.4083799 | 4.0763866  | 1.8635324  |
| H | -3.7673903 | 2.7510559  | 5.9409953  |
| H | 4.8388707  | 2.0820786  | -1.7370989 |
| H | 5.1064011  | 0.4429049  | -2.3410353 |
| H | 5.6955971  | 0.8886935  | -0.7341116 |
| H | -3.7072168 | 4.6013701  | 4.2792644  |
| N | -3.9032746 | -1.5963009 | 3.0135635  |
| N | -5.0723147 | -1.6777600 | 3.5703062  |
| C | -5.8755538 | -0.4367625 | 3.6636739  |
| C | -6.1967090 | 0.3884610  | 2.4974910  |
| C | -6.3061184 | -0.1811140 | 4.8869669  |
| C | -6.7233958 | 1.6854237  | 2.6425536  |
| C | -5.9564745 | -0.0947861 | 1.1990541  |
| O | -6.6550403 | -0.0660500 | 6.0086903  |
| C | -6.9967561 | 2.4717453  | 1.5294761  |
| H | -6.8869307 | 2.0865865  | 3.6398789  |
| C | -6.2188301 | 0.7036203  | 0.0866824  |
| H | -5.5617615 | -1.0971556 | 1.0715603  |
| C | -6.7363653 | 1.9909229  | 0.2418462  |
| H | -7.3966131 | 3.4730199  | 1.6660241  |
| H | -6.0162721 | 0.3157740  | -0.9085307 |
| H | -6.9338450 | 2.6124677  | -0.6269354 |

**G** : ketene-like with a trans N=N bond  
58

Energy = -1393.659430062

|   |            |            |            |
|---|------------|------------|------------|
| N | -0.2595110 | -1.7978094 | 0.1003714  |
| N | -1.5804097 | -1.5934832 | 0.2699264  |
| N | 0.2807729  | -0.6225616 | 0.3944308  |
| C | -1.8915897 | -0.2918831 | 0.6549650  |
| C | -2.4663161 | -2.7364688 | 0.0624424  |
| C | 1.7137099  | -0.4549731 | 0.3255074  |
| C | -0.6311321 | 0.3171871  | 0.7320531  |
| C | -3.1840851 | 0.2613668  | 0.8829551  |
| H | -1.8346344 | -3.6246651 | 0.0368829  |
| H | -3.0179856 | -2.6205278 | -0.8704301 |
| H | -3.1772952 | -2.7805632 | 0.8876421  |
| C | 2.4253845  | -0.3566721 | 1.5270038  |
| C | 2.3154373  | -0.3809323 | -0.9373514 |
| H | -0.3471484 | 1.3288156  | 0.9653885  |
| C | -3.2856774 | 1.5442693  | 1.6104230  |
| C | 3.8092119  | -0.1810998 | 1.4338123  |
| C | 1.7406979  | -0.4353368 | 2.8683399  |
| C | 3.7005375  | -0.2026308 | -0.9710226 |
| C | 1.5106260  | -0.4816680 | -2.2077959 |
| C | -4.1948061 | 2.5481467  | 1.2214250  |
| C | -2.4717225 | 1.7981219  | 2.7317507  |
| C | 4.4623404  | -0.1046492 | 0.1993509  |
| H | 4.3880338  | -0.1057472 | 2.3514583  |
| H | 1.0137437  | -1.2532283 | 2.9004182  |
| H | 2.4773858  | -0.5952326 | 3.6587434  |
| H | 1.2023521  | 0.4927172  | 3.0943378  |
| H | 4.1931145  | -0.1324625 | -1.9381403 |

|   |             |            |            |
|---|-------------|------------|------------|
| H | 2.1187098   | -0.1827312 | -3.0644254 |
| H | 1.1637249   | -1.5073936 | -2.3725329 |
| H | 0.6240035   | 0.1606442  | -2.1708791 |
| C | -4.2660667  | 3.7550236  | 1.9134643  |
| H | -4.8460153  | 2.3733442  | 0.3737967  |
| C | -2.5421979  | 3.0068613  | 3.4222023  |
| H | -1.7892251  | 1.0260852  | 3.0789143  |
| C | 5.9603391   | 0.0567827  | 0.1286213  |
| C | -3.4408372  | 3.9957337  | 3.0158551  |
| H | -4.9709864  | 4.5159839  | 1.5881458  |
| H | -1.9042049  | 3.1706253  | 4.2869491  |
| H | 6.2499525   | 0.6847514  | -0.7194293 |
| H | 6.4448603   | -0.9187345 | -0.0040299 |
| H | 6.3538358   | 0.5019268  | 1.0466897  |
| H | -3.5037959  | 4.9367356  | 3.5552020  |
| N | -4.2216735  | -0.4465330 | 0.3774359  |
| N | -5.4208445  | 0.0053750  | 0.5797451  |
| C | -6.4625005  | -0.7794864 | 0.0120563  |
| C | -7.8501981  | -0.3955420 | 0.2888834  |
| C | -6.1434245  | -1.8086605 | -0.7762072 |
| C | -8.9397880  | -1.1297527 | -0.2158457 |
| C | -8.1111668  | 0.7392675  | 1.0775802  |
| O | -5.7465032  | -2.6702171 | -1.4708641 |
| C | -10.2472406 | -0.7407520 | 0.0574199  |
| H | -8.7604619  | -2.0131919 | -0.8261135 |
| C | -9.4252341  | 1.1224098  | 1.3480613  |
| H | -7.2725970  | 1.3058143  | 1.4685947  |
| C | -10.5009397 | 0.3898355  | 0.8426567  |
| H | -11.0732009 | -1.3228867 | -0.3425729 |
| H | -9.6082894  | 2.0023768  | 1.9596992  |
| H | -11.5222553 | 0.6921291  | 1.0557228  |

**2aH<sup>+</sup> : ylidic carbon protonated mNHO 2a**  
44

Energy = -901.9075346309

|   |            |            |            |
|---|------------|------------|------------|
| N | 0.3172789  | 1.3505084  | 0.3096209  |
| N | -0.9566004 | 1.3702623  | -0.0500703 |
| N | 0.8360872  | 0.3418403  | -0.3808902 |
| C | -1.2761027 | 0.3919154  | -0.9561198 |
| C | -1.8543436 | 2.3674821  | 0.5455378  |
| C | 2.2368186  | 0.0039088  | -0.2335032 |
| C | -0.0900441 | -0.2749041 | -1.1665023 |
| C | -2.6540300 | 0.1674150  | -1.4840953 |
| H | -1.2380145 | 3.0667843  | 1.1064183  |
| H | -2.5594242 | 1.8559910  | 1.2027395  |
| H | -2.3881899 | 2.8791508  | -0.2554066 |
| C | 3.1840531  | 0.8144993  | -0.8696090 |
| C | 2.5590937  | -1.1255768 | 0.5295742  |
| H | 0.1583024  | -1.1083958 | -1.8029020 |
| C | -3.6397529 | -0.2080699 | -0.3857687 |
| H | -2.9996911 | 1.0715575  | -1.9969813 |
| C | 4.5244622  | 0.4506854  | -0.7183371 |
| C | 2.7854904  | 2.0203268  | -1.6806968 |
| C | 3.9148309  | -1.4381315 | 0.6478733  |
| C | 1.5009684  | -1.9660056 | 1.1988876  |

|   |            |            |            |
|---|------------|------------|------------|
| C | -4.8725065 | 0.4451975  | -0.2977593 |
| C | -3.3265096 | -1.2066836 | 0.5442311  |
| C | 4.9080008  | -0.6641843 | 0.0355698  |
| H | 5.2854595  | 1.0540310  | -1.2071081 |
| H | 2.4213677  | 2.8265360  | -1.0340953 |
| H | 3.6422668  | 2.3966239  | -2.2430468 |
| H | 1.9866834  | 1.7806648  | -2.3912681 |
| H | 4.1990131  | -2.3070779 | 1.2363731  |
| H | 1.9640749  | -2.6784066 | 1.8842843  |
| H | 0.8003622  | -1.3472677 | 1.7703494  |
| H | 0.9198048  | -2.5371589 | 0.4653158  |
| C | -5.7835819 | 0.1025373  | 0.7029860  |
| H | -5.1202484 | 1.2249403  | -1.0138270 |
| C | -4.2342929 | -1.5476032 | 1.5464130  |
| H | -2.3715909 | -1.7243681 | 0.4846026  |
| C | 6.3646848  | -1.0118599 | 0.2071945  |
| C | -5.4654896 | -0.8928048 | 1.6280315  |
| H | -6.7385496 | 0.6165558  | 0.7608560  |
| H | -3.9818280 | -2.3244850 | 2.2620973  |
| H | 6.7562277  | -0.5630970 | 1.1287247  |
| H | 6.9623268  | -0.6332867 | -0.6264895 |
| H | 6.5064790  | -2.0938833 | 0.2819670  |
| H | -6.1717559 | -1.1568659 | 2.4094869  |
| H | -2.5939856 | -0.6227736 | -2.2390814 |

**2a : mNHO**

43

Energy = -901.4240576117

|   |            |            |            |
|---|------------|------------|------------|
| N | 0.7346772  | 2.0311123  | 0.0227195  |
| N | -0.6029641 | 2.2200933  | 0.0231192  |
| N | 0.8511412  | 0.7147898  | 0.0092983  |
| C | -1.3567153 | 1.0340553  | 0.0057808  |
| C | -1.1337838 | 3.5685662  | 0.0336478  |
| C | 2.1657343  | 0.1174508  | -0.0035322 |
| C | -0.3328737 | 0.0517580  | 0.0000708  |
| C | -2.7469696 | 1.0294055  | -0.0093788 |
| H | -0.2934538 | 4.2604937  | 0.0710129  |
| H | -1.7736514 | 3.7050894  | 0.9113844  |
| H | -1.7244659 | 3.7430751  | -0.8716304 |
| C | 2.8403468  | 0.0249641  | -1.2264483 |
| C | 2.6928300  | -0.3562061 | 1.2038497  |
| H | -0.3545730 | -1.0219873 | -0.0407960 |
| C | -3.6296509 | -0.1019541 | 0.0087989  |
| H | -3.2256378 | 2.0042017  | -0.0464208 |
| C | 4.1030518  | -0.5746007 | -1.2149367 |
| C | 2.2344584  | 0.5503233  | -2.5026794 |
| C | 3.9599921  | -0.9440861 | 1.1597283  |
| C | 1.9296995  | -0.2398675 | 2.4988440  |
| C | -5.0325098 | 0.1248692  | -0.0787934 |
| C | -3.2284478 | -1.4612589 | 0.1166102  |
| C | 4.6784730  | -1.0601465 | -0.0356205 |
| H | 4.6457653  | -0.6668076 | -2.1530784 |
| H | 2.2126890  | 1.6456858  | -2.5023479 |
| H | 2.8171764  | 0.2181624  | -3.3648191 |
| H | 1.2023962  | 0.2046291  | -2.6256854 |

|   |            |            |            |
|---|------------|------------|------------|
| H | 4.3936636  | -1.3192487 | 2.0839983  |
| H | 2.5722140  | -0.5028412 | 3.3421014  |
| H | 1.5567106  | 0.7786712  | 2.6490110  |
| H | 1.0620598  | -0.9094434 | 2.5093309  |
| C | -5.9527879 | -0.9144703 | -0.0671500 |
| H | -5.3861788 | 1.1513738  | -0.1592871 |
| C | -4.1577256 | -2.4995081 | 0.1280541  |
| H | -2.1794178 | -1.7163753 | 0.2107718  |
| C | 6.0565257  | -1.6741178 | -0.0476951 |
| C | -5.5292275 | -2.2471786 | 0.0340379  |
| H | -7.0141098 | -0.6861232 | -0.1381597 |
| H | -3.8007214 | -3.5236655 | 0.2146369  |
| H | 6.1536476  | -2.4431105 | 0.7244121  |
| H | 6.8187727  | -0.9096854 | 0.1496000  |
| H | 6.2811505  | -2.1216372 | -1.0202192 |
| H | -6.2477068 | -3.0616049 | 0.0419587  |

**3aaH<sup>+</sup> : N-protonated 3aa**

59

Energy = -1394.157601927

|   |            |            |            |
|---|------------|------------|------------|
| N | 1.8652150  | -1.6143609 | 0.8716809  |
| N | 0.5949294  | -1.2509076 | 0.9239342  |
| N | 2.5045704  | -0.5283345 | 0.4484120  |
| C | 0.3995032  | 0.0505877  | 0.5359077  |
| C | -0.4084381 | -2.2263969 | 1.3735658  |
| C | 3.9391106  | -0.5499102 | 0.2611064  |
| C | 1.6586860  | 0.5146038  | 0.2305656  |
| C | -0.9312895 | 0.7270425  | 0.4945985  |
| H | -1.0320938 | -1.7489002 | 2.1298895  |
| H | 0.1295452  | -3.0721702 | 1.7960537  |
| H | -1.0024306 | -2.5442798 | 0.5154983  |
| C | 4.7543459  | -0.6786957 | 1.3931226  |
| C | 4.4281405  | -0.4228467 | -1.0461125 |
| H | 2.0035120  | 1.4801659  | -0.0990419 |
| C | -0.8529766 | 2.0868110  | -0.2175872 |
| N | -1.5406494 | 0.7766035  | 1.8199412  |
| C | 6.1336439  | -0.6789553 | 1.1745577  |
| C | 4.1882955  | -0.8006081 | 2.7845184  |
| C | 5.8158443  | -0.4345930 | -1.2006540 |
| C | 3.5174100  | -0.2860165 | -2.2406426 |
| C | -1.2842991 | 3.2646915  | 0.3941636  |
| C | -0.3632319 | 2.1212787  | -1.5301275 |
| N | -2.8519664 | 0.4578261  | 1.7881368  |
| C | 6.6812592  | -0.5633659 | -0.1082317 |
| H | 6.7951440  | -0.7648898 | 2.0329939  |
| H | 3.7777196  | -1.8013593 | 2.9568923  |
| H | 4.9717785  | -0.6231574 | 3.5239307  |
| H | 3.3830633  | -0.0784323 | 2.9581372  |
| H | 6.2276359  | -0.3452694 | -2.2028342 |
| H | 4.0705417  | -0.4956980 | -3.1581684 |
| H | 2.6697131  | -0.9769774 | -2.1873545 |
| H | 3.1163391  | 0.7313674  | -2.3233367 |
| C | -1.1996741 | 4.4765512  | -0.2944533 |
| H | -1.6934654 | 3.2567137  | 1.3988409  |
| C | -0.2762018 | 3.3336276  | -2.2103094 |

|   |            |            |            |
|---|------------|------------|------------|
| H | -0.0695675 | 1.2005134  | -2.0255922 |
| C | -3.1844366 | -0.0844666 | 0.6337702  |
| C | 8.1738896  | -0.6013305 | -0.3123462 |
| C | -0.6908381 | 4.5154825  | -1.5918546 |
| H | -1.5344100 | 5.3885460  | 0.1899203  |
| H | 0.1059118  | 3.3524720  | -3.2263066 |
| C | -4.5190337 | -0.6231497 | 0.3763781  |
| C | -2.0241520 | -0.1089965 | -0.2715465 |
| H | 8.4699164  | -0.0017599 | -1.1777404 |
| H | 8.5055894  | -1.6313333 | -0.4940335 |
| H | 8.7028649  | -0.2339675 | 0.5713209  |
| H | -0.6247907 | 5.4599448  | -2.1231056 |
| C | -4.9003417 | -1.0006376 | -0.9227787 |
| C | -5.4431555 | -0.7573588 | 1.4295167  |
| O | -1.8565067 | -0.6349494 | -1.3566045 |
| C | -6.1815988 | -1.4967252 | -1.1600927 |
| H | -4.1954127 | -0.9049347 | -1.7406719 |
| C | -6.7192572 | -1.2509769 | 1.1834498  |
| H | -5.1498778 | -0.4735483 | 2.4352552  |
| C | -7.0941114 | -1.6230746 | -0.1121834 |
| H | -6.4660720 | -1.7835858 | -2.1681605 |
| H | -7.4243375 | -1.3507251 | 2.0035235  |
| H | -8.0908324 | -2.0111832 | -0.3001572 |
| H | -1.2888468 | 1.4896915  | 2.4954476  |

**3aa : 3-triazolium-(3*H*-)pyrazol-4-olate**

58

Energy = -1393.701029554

|   |            |            |            |
|---|------------|------------|------------|
| N | 0.9232247  | -1.5639984 | 1.3605293  |
| N | 2.1988850  | -1.2114411 | 1.3297055  |
| O | -1.5398835 | 0.2182906  | -1.7794372 |
| N | -2.6661148 | 0.4163871  | 1.5454114  |
| C | 5.8993283  | 1.6555880  | -0.4887122 |
| N | 2.2439830  | -0.2284535 | 0.4334671  |
| C | 4.9273185  | 2.3177816  | 0.2677576  |
| C | -3.5441741 | 2.5659827  | -1.3988415 |
| C | -1.7406367 | -2.3659749 | -0.0872822 |
| C | 1.0198106  | 0.0446566  | -0.0982942 |
| C | -2.8955033 | -2.9727358 | 0.4185757  |
| C | -5.0431012 | 3.8516007  | 0.5700520  |
| C | -0.9966846 | -3.0197420 | -1.0776471 |
| C | -1.3939449 | -4.2726444 | -1.5454487 |
| C | -4.2733874 | 2.7402245  | 0.9012245  |
| C | 3.5024409  | 0.4134097  | 0.1258270  |
| C | 4.4371731  | -0.2973378 | -0.6388239 |
| N | -1.9269846 | -0.6283269 | 1.7161327  |
| C | 3.7077455  | 1.7165973  | 0.5925753  |
| C | 0.1408322  | -0.8264843 | 0.5087781  |
| C | -2.5422457 | -4.8793385 | -1.0331914 |
| C | -5.0730071 | 4.3313995  | -0.7438046 |
| C | -2.7052720 | 0.9067475  | 0.2619492  |
| C | -1.8685027 | 0.1265576  | -0.5815023 |
| C | -3.2925339 | -4.2234582 | -0.0540749 |
| C | -1.3300944 | -0.9839757 | 0.3796828  |
| C | -3.5071083 | 2.0726537  | -0.0777916 |

|   |            |            |            |
|---|------------|------------|------------|
| C | -4.3181287 | 3.6792906  | -1.7221276 |
| C | 5.6355678  | 0.3542963  | -0.9345131 |
| H | 6.3774665  | -0.1679151 | -1.5339817 |
| H | 5.1191704  | 3.3284616  | 0.6195820  |
| H | 0.8627333  | 0.7921039  | -0.8578233 |
| H | -3.4688981 | -2.4648510 | 1.1871213  |
| H | -4.1891229 | -4.6882154 | 0.3466790  |
| H | -2.8507348 | -5.8561565 | -1.3946477 |
| H | -0.8077408 | -4.7725040 | -2.3114957 |
| H | -0.1115603 | -2.5439944 | -1.4916636 |
| H | -2.9589399 | 2.0629536  | -2.1617165 |
| H | -4.3317830 | 4.0400531  | -2.7478854 |
| H | -5.6755478 | 5.1987181  | -0.9993734 |
| H | -5.6259560 | 4.3479800  | 1.3423087  |
| H | -4.2557396 | 2.3723184  | 1.9225150  |
| C | 0.4933375  | -2.6589323 | 2.2415919  |
| H | 0.3291154  | -3.5513000 | 1.6348394  |
| H | 1.2854463  | -2.8236110 | 2.9692409  |
| H | -0.4340926 | -2.3469358 | 2.7212322  |
| C | 4.1648063  | -1.6959398 | -1.1303918 |
| H | 4.9239873  | -1.9948518 | -1.8559017 |
| H | 4.1782992  | -2.4148425 | -0.3041008 |
| H | 3.1831401  | -1.7657698 | -1.6125435 |
| C | 2.6714798  | 2.4465912  | 1.4088757  |
| H | 1.8267080  | 2.7652055  | 0.7869021  |
| H | 2.2724819  | 1.8159705  | 2.2102220  |
| H | 3.1082352  | 3.3400567  | 1.8594489  |
| C | 7.2153934  | 2.3200351  | -0.8049724 |
| H | 7.1611243  | 3.4001308  | -0.6456481 |
| H | 8.0093288  | 1.9231584  | -0.1602924 |
| H | 7.5119092  | 2.1316557  | -1.8416445 |

**TS1a** : nucleophilic addition with trans-Ph  
64

Energy = -1509.485506662

|   |            |            |            |
|---|------------|------------|------------|
| N | -0.5402432 | 1.7848188  | 2.4321131  |
| N | 0.7889124  | 1.8018934  | 2.3959925  |
| N | -0.8894492 | 1.5376390  | 1.1751667  |
| C | 1.3152454  | 1.5688478  | 1.1384992  |
| C | 1.5307558  | 1.9952861  | 3.6406960  |
| C | -2.2671242 | 1.3062517  | 0.8097541  |
| C | 0.1792969  | 1.3942676  | 0.3456901  |
| C | 2.6672931  | 1.1645839  | 0.9009100  |
| H | 2.2865114  | 2.7666166  | 3.4864916  |
| H | 2.0075249  | 1.0549398  | 3.9266982  |
| H | 0.8187648  | 2.3050903  | 4.4034521  |
| C | -2.8583994 | 0.1043317  | 1.2218157  |
| C | -2.9080093 | 2.2445052  | -0.0060309 |
| H | 0.0397821  | 1.1561307  | -0.6920080 |
| C | 3.3653885  | 1.4412319  | -0.3625034 |
| H | 3.3089373  | 1.2230798  | 1.7758636  |
| C | -4.1610736 | -0.1399526 | 0.7854382  |
| C | -2.1190130 | -0.8969229 | 2.0702734  |
| C | -4.2118729 | 1.9476967  | -0.4113338 |
| C | -2.2261895 | 3.5129144  | -0.4523593 |

|   |            |            |            |
|---|------------|------------|------------|
| C | 2.7252068  | 1.8839728  | -1.5326162 |
| C | 4.7464868  | 1.1704257  | -0.4293316 |
| C | -4.8476906 | 0.7607141  | -0.0354799 |
| H | -4.6399851 | -1.0718153 | 1.0761675  |
| H | -1.1171210 | -1.0889168 | 1.6711016  |
| H | -2.0069662 | -0.5395241 | 3.0997078  |
| H | -2.6639396 | -1.8429086 | 2.0914489  |
| H | -4.7374453 | 2.6610049  | -1.0419804 |
| H | -1.6342524 | 3.9610382  | 0.3514867  |
| H | -1.5480028 | 3.3197071  | -1.2927421 |
| H | -2.9671775 | 4.2427728  | -0.7863944 |
| C | 3.4346671  | 2.0374038  | -2.7242186 |
| H | 1.6734398  | 2.1478816  | -1.5160185 |
| C | 5.4535882  | 1.3254931  | -1.6168314 |
| H | 5.2592286  | 0.8271741  | 0.4657973  |
| C | -6.2294405 | 0.4332709  | -0.5419285 |
| C | 4.7999879  | 1.7554064  | -2.7768956 |
| H | 2.9163209  | 2.3857329  | -3.6136659 |
| H | 6.5184499  | 1.1095970  | -1.6406798 |
| H | -6.1634782 | -0.1986485 | -1.4369894 |
| H | -6.7784260 | 1.3391116  | -0.8141749 |
| H | -6.8068905 | -0.1178462 | 0.2063931  |
| H | 5.3504006  | 1.8752950  | -3.7055259 |
| N | 2.4140610  | -0.7089972 | 0.8546827  |
| N | 1.4561829  | -0.9379257 | 0.1371470  |
| C | 0.7742018  | -2.0503366 | -0.2186901 |
| C | -0.3626169 | -1.8210176 | -1.1256829 |
| C | 1.0881608  | -3.3607790 | 0.3065449  |
| C | -1.5670184 | -2.5455387 | -1.0408760 |
| C | -0.2902841 | -0.7930811 | -2.0894070 |
| O | 0.4761250  | -4.4070994 | 0.0580301  |
| O | 2.1637947  | -3.3469135 | 1.1523602  |
| C | -2.6606159 | -2.2127587 | -1.8386176 |
| H | -1.6456911 | -3.3550694 | -0.3246118 |
| C | -1.3880573 | -0.4554426 | -2.8781346 |
| H | 0.6525559  | -0.2650754 | -2.2128549 |
| C | 2.4994026  | -4.6274879 | 1.7230689  |
| C | -2.5887727 | -1.1579156 | -2.7510101 |
| H | -3.5868765 | -2.7716133 | -1.7294942 |
| H | -1.3014201 | 0.3495079  | -3.6042123 |
| H | 3.3540748  | -4.4334032 | 2.3715214  |
| H | 1.6588601  | -5.0240036 | 2.2996549  |
| H | 2.7654026  | -5.3408168 | 0.9378560  |
| H | -3.4498058 | -0.8933277 | -3.3581967 |

**TS1c** : nucleophilic addition with cis N=N  
64

Energy = -1509.480238710

|   |            |            |            |
|---|------------|------------|------------|
| N | -0.2119767 | -1.5750389 | -1.7890841 |
| N | 0.9893669  | -1.0045658 | -1.8300042 |
| N | -0.5277746 | -1.5565065 | -0.4967693 |
| C | 1.4465207  | -0.5836197 | -0.5963579 |
| C | 1.6927579  | -0.9031277 | -3.1093180 |
| C | -1.7628671 | -2.1644610 | -0.0517163 |



|   |            |            |            |
|---|------------|------------|------------|
| C | 0.4308019  | -0.9727623 | 0.2681995  |
| C | 2.6856921  | 0.1342838  | -0.3857114 |
| H | 2.6977320  | -1.3083671 | -2.9774959 |
| H | 1.7448070  | 0.1472540  | -3.3989837 |
| H | 1.1340472  | -1.4902549 | -3.8361705 |
| C | -2.8290798 | -1.3351212 | 0.3112272  |
| C | -1.8119189 | -3.5649870 | 0.0093309  |
| H | 0.3174867  | -0.8494422 | 1.3319939  |
| C | 3.7677730  | -0.4968242 | 0.3803517  |
| H | 3.0097542  | 0.6783457  | -1.2685280 |
| C | -3.9975715 | -1.9678739 | 0.7514891  |
| C | -2.7366250 | 0.1660776  | 0.2500316  |
| C | -3.0012750 | -4.1396478 | 0.4581889  |
| C | -0.6329539 | -4.4176382 | -0.3849179 |
| C | 5.0729575  | 0.0182703  | 0.2578569  |
| C | 3.5597259  | -1.5456603 | 1.2939479  |
| C | -4.1035337 | -3.3587326 | 0.8305456  |
| H | -4.8462062 | -1.3500174 | 1.0354904  |
| H | -3.7357193 | 0.6075746  | 0.2571057  |
| H | -2.1966953 | 0.5659816  | 1.1156650  |
| H | -2.2103599 | 0.5145077  | -0.6423582 |
| H | -3.0646626 | -5.2235503 | 0.5220193  |
| H | 0.2878897  | -4.0768613 | 0.1020265  |
| H | -0.8066637 | -5.4574650 | -0.1001932 |
| H | -0.4631018 | -4.3810868 | -1.4664837 |
| C | 6.1252681  | -0.4995487 | 1.0075358  |
| H | 5.2532436  | 0.8350721  | -0.4370289 |
| C | 4.6137642  | -2.0643343 | 2.0453596  |
| H | 2.5677909  | -1.9731198 | 1.4130244  |
| C | -5.3808008 | -4.0123538 | 1.2955824  |
| C | 5.9035236  | -1.5466014 | 1.9082599  |
| H | 7.1233160  | -0.0852754 | 0.8900393  |
| H | 4.4257677  | -2.8784267 | 2.7407400  |
| H | -5.1787658 | -4.7627026 | 2.0674743  |
| H | -5.8764522 | -4.5267229 | 0.4634321  |
| H | -6.0770168 | -3.2737186 | 1.7012201  |
| H | 6.7241763  | -1.9525803 | 2.4927698  |
| N | 2.2024281  | 1.5342351  | 0.8685049  |
| N | 1.2093741  | 2.2103309  | 0.7171366  |
| C | 0.1664119  | 2.4516593  | -0.1180976 |
| C | -0.9719663 | 3.1371775  | 0.5171671  |
| C | 0.2954622  | 2.1683249  | -1.5298809 |
| C | -1.1160684 | 3.0618970  | 1.9202596  |
| C | -1.9374862 | 3.8843088  | -0.1879464 |
| O | 1.3532672  | 2.0247623  | -2.1541843 |
| O | -0.9166800 | 2.1015463  | -2.1755429 |
| C | -2.1609373 | 3.7005205  | 2.5823738  |
| H | -0.3920031 | 2.4859527  | 2.4893993  |
| C | -2.9887750 | 4.5125254  | 0.4770655  |
| H | -1.8657946 | 3.9743990  | -1.2646515 |
| C | -0.8563710 | 2.0023140  | -3.6157461 |
| C | -3.1140853 | 4.4282119  | 1.8658448  |
| H | -2.2381707 | 3.6162425  | 3.6636828  |
| H | -3.7137786 | 5.0823627  | -0.0993304 |
| H | -0.6073586 | 0.9802628  | -3.9144295 |

|   |            |           |            |
|---|------------|-----------|------------|
| H | -1.8570773 | 2.2584997 | -3.9641962 |
| H | -0.1123945 | 2.6930074 | -4.0173773 |
| H | -3.9374042 | 4.9180459 | 2.3782371  |

**TS1** : nucleophilic addition, trans N=N cis-Ph  
64

Energy = -1509.489504639

|   |            |            |            |
|---|------------|------------|------------|
| N | 0.9410366  | -2.2252211 | -2.2283596 |
| N | 1.8565034  | -1.2578746 | -2.2218988 |
| N | 0.4394898  | -2.1917452 | -1.0006451 |
| C | 1.9557624  | -0.5953078 | -1.0101788 |
| C | 2.6064096  | -0.9799529 | -3.4449391 |
| C | -0.6380892 | -3.0747526 | -0.6142853 |
| C | 1.0048217  | -1.2363046 | -0.2160426 |
| C | 2.6894292  | 0.6115176  | -0.8218948 |
| H | 2.3504052  | -1.7510036 | -4.1691981 |
| H | 3.6743048  | -1.0047543 | -3.2212475 |
| H | 2.3269725  | 0.0044798  | -3.8265031 |
| C | -1.9480899 | -2.5935076 | -0.7264502 |
| C | -0.3141214 | -4.3331214 | -0.0950607 |
| H | 0.6456951  | -1.0447019 | 0.7790470  |
| C | 3.3087337  | 0.9976362  | 0.4457305  |
| H | 3.2427129  | 0.9373503  | -1.6985807 |
| C | -2.9709019 | -3.4387106 | -0.2879678 |
| C | -2.2418042 | -1.2289079 | -1.2932787 |
| C | -1.3762785 | -5.1375735 | 0.3250614  |
| C | 1.1154685  | -4.7993223 | 0.0082045  |
| C | 4.4771675  | 1.7860793  | 0.4087832  |
| C | 2.7539992  | 0.7010143  | 1.7060744  |
| C | -2.7057466 | -4.7084949 | 0.2367634  |
| H | -3.9990629 | -3.0914511 | -0.3572153 |
| H | -1.8646848 | -1.1402036 | -2.3182856 |
| H | -3.3183981 | -1.0476651 | -1.3068445 |
| H | -1.7660131 | -0.4382266 | -0.7032471 |
| H | -1.1557506 | -6.1189299 | 0.7386774  |
| H | 1.1667222  | -5.7529458 | 0.5376762  |
| H | 1.5577636  | -4.9336643 | -0.9854637 |
| H | 1.7357787  | -4.0730481 | 0.5451589  |
| C | 5.0783719  | 2.2414327  | 1.5778355  |
| H | 4.9135480  | 2.0359150  | -0.5556767 |
| C | 3.3565565  | 1.1635965  | 2.8753487  |
| H | 1.8287765  | 0.1451252  | 1.7845769  |
| C | -3.8329280 | -5.6079451 | 0.6785084  |
| C | 4.5226333  | 1.9290573  | 2.8228925  |
| H | 5.9825534  | 2.8416342  | 1.5192215  |
| H | 2.9059584  | 0.9266373  | 3.8357221  |
| H | -3.5263848 | -6.2445995 | 1.5137170  |
| H | -4.1412572 | -6.2668393 | -0.1429903 |
| H | -4.7075137 | -5.0254208 | 0.9816491  |
| H | 4.9902257  | 2.2820618  | 3.7376189  |
| N | 1.1364696  | 1.8551002  | -0.9036711 |
| N | 0.3398275  | 1.5022236  | -0.0641035 |
| C | -0.8563346 | 1.9720556  | 0.3682958  |
| C | -1.4832816 | 3.1536675  | -0.2414137 |
| C | -1.4502722 | 1.2335891  | 1.4646484  |

|   |            |            |            |
|---|------------|------------|------------|
| C | -2.7795841 | 3.6028119  | 0.1096836  |
| C | -0.8002478 | 3.8900398  | -1.2356703 |
| O | -2.5177654 | 1.4831439  | 2.0277574  |
| O | -0.7009839 | 0.1445172  | 1.8868580  |
| C | -3.3436113 | 4.7212519  | -0.4984201 |
| H | -3.3337502 | 3.0634155  | 0.8655470  |
| C | -1.3723357 | 5.0094909  | -1.8378609 |
| H | 0.1942524  | 3.5768171  | -1.5359122 |
| C | -1.3083076 | -0.6073249 | 2.9601866  |
| C | -2.6497449 | 5.4389317  | -1.4762890 |
| H | -4.3420930 | 5.0341245  | -0.2018521 |
| H | -0.8095840 | 5.5486387  | -2.5961786 |
| H | -1.4323409 | 0.0180997  | 3.8473599  |
| H | -2.2811143 | -0.9992010 | 2.6522152  |
| H | -0.6139987 | -1.4240254 | 3.1629625  |
| H | -3.0954423 | 6.3118123  | -1.9454424 |

**TS20 : TS2 but Ph trans to pro-carbenic C-H**  
107

Energy = -2410.924240826

|   |            |            |            |
|---|------------|------------|------------|
| N | -3.9577075 | -0.0925610 | -2.2602234 |
| N | -2.6806602 | -0.4446179 | -2.4439753 |
| N | -4.1520147 | -0.3126629 | -0.9632116 |
| C | -2.0531898 | -0.9028125 | -1.2922642 |
| C | -2.1017326 | -0.2458597 | -3.7697094 |
| C | -5.4265437 | -0.0151993 | -0.3536343 |
| C | -3.0535951 | -0.7901346 | -0.3251141 |
| C | -0.6286420 | -1.1897253 | -1.1892167 |
| H | -1.0206308 | -0.2184791 | -3.6536378 |
| H | -2.4739639 | 0.6989272  | -4.1655770 |
| H | -2.3766442 | -1.0677484 | -4.4340047 |
| C | -5.5219909 | 1.1481317  | 0.4181465  |
| C | -6.4822664 | -0.9183139 | -0.5297718 |
| H | -3.0336620 | -0.9681837 | 0.7358766  |
| C | -0.0199721 | -2.2106641 | -2.0746641 |
| N | 0.0005300  | -1.1542616 | 0.1132706  |
| C | -6.7496951 | 1.3953630  | 1.0410435  |
| C | -4.3592755 | 2.0937434  | 0.5602489  |
| C | -7.6862243 | -0.6195899 | 0.1116404  |
| C | -6.3260998 | -2.1611630 | -1.3683150 |
| C | -0.7493343 | -2.9895020 | -2.9912679 |
| C | 1.3749234  | -2.4145263 | -2.0104485 |
| N | -0.7741374 | -0.7366004 | 1.0532292  |
| C | -7.8363430 | 0.5263158  | 0.9031958  |
| H | -6.8560891 | 2.2940314  | 1.6442812  |
| H | -3.9768172 | 2.4033273  | -0.4175238 |
| H | -4.6614276 | 2.9880996  | 1.1093659  |
| H | -3.5230213 | 1.6285145  | 1.0919340  |
| H | -8.5235669 | -1.3038606 | -0.0060501 |
| H | -7.2133524 | -2.7920704 | -1.2807142 |
| H | -6.1846184 | -1.9091369 | -2.4248713 |
| H | -5.4543909 | -2.7451294 | -1.0520020 |
| C | -0.1124766 | -3.9014069 | -3.8337167 |
| H | -1.8327907 | -2.9083306 | -3.0256374 |
| C | 2.0085285  | -3.3267537 | -2.8490624 |

|   |            |            |            |
|---|------------|------------|------------|
| H | 1.9365933  | -1.8501094 | -1.2739548 |
| C | -0.2674497 | -0.3878272 | 2.2645846  |
| C | -9.1416625 | 0.8049177  | 1.6063752  |
| C | 1.2725342  | -4.0721060 | -3.7765429 |
| H | -0.7056018 | -4.4923993 | -4.5271469 |
| H | 3.0854784  | -3.4595182 | -2.7806832 |
| C | 1.1689052  | -0.3691471 | 2.5815933  |
| C | -1.2301386 | 0.0884900  | 3.2186230  |
| H | -9.2746136 | 0.1247913  | 2.4567544  |
| H | -9.9922459 | 0.6540749  | 0.9334743  |
| H | -9.1741087 | 1.8295651  | 1.9863429  |
| H | 1.7682360  | -4.7818890 | -4.4325862 |
| C | 1.7589051  | 0.7049707  | 3.2817430  |
| C | 2.0233012  | -1.4025518 | 2.1385557  |
| O | -0.9967016 | 0.5629190  | 4.3405751  |
| O | -2.5539462 | -0.0526593 | 2.7982075  |
| C | 3.1318560  | 0.7445773  | 3.5247868  |
| H | 1.1244210  | 1.5112906  | 3.6325583  |
| C | 3.3904407  | -1.3702447 | 2.4046662  |
| H | 1.6011768  | -2.2319678 | 1.5850462  |
| C | -3.5251634 | 0.4180432  | 3.7497843  |
| C | 3.9588682  | -0.2952143 | 3.0917306  |
| H | 3.5578035  | 1.5932808  | 4.0551266  |
| H | 4.0206781  | -2.1891630 | 2.0685901  |
| H | -3.4455039 | -0.1279368 | 4.6942103  |
| H | -3.3958992 | 1.4871283  | 3.9442448  |
| H | -4.4948381 | 0.2332441  | 3.2837498  |
| H | 5.0288142  | -0.2628528 | 3.2728155  |
| H | -0.0560527 | 0.0174088  | -1.6655386 |
| C | 0.6319123  | 1.2775608  | -1.9050822 |
| C | 2.0131088  | 0.9827781  | -1.6330067 |
| C | -0.1012250 | 2.2724131  | -1.0921785 |
| H | 0.4708847  | 1.4403748  | -2.9726951 |
| N | 2.8978330  | 0.6002729  | -2.6310794 |
| C | 2.7995037  | 0.9137687  | -0.4784460 |
| C | -0.9918159 | 3.1562736  | -1.7351516 |
| C | 0.0017882  | 2.3614410  | 0.3082643  |
| N | 4.1321695  | 0.3192304  | -2.1876857 |
| C | 2.5878101  | 0.3773161  | -4.0346898 |
| N | 4.0396284  | 0.5287403  | -0.8781498 |
| H | 2.5694520  | 1.0525370  | 0.5639681  |
| C | -1.7162642 | 4.1059993  | -1.0186467 |
| H | -1.0987681 | 3.1038567  | -2.8172074 |
| C | -0.7231039 | 3.3105177  | 1.0242051  |
| H | 0.6154836  | 1.6579405  | 0.8567249  |
| H | 3.5201150  | 0.1446093  | -4.5463144 |
| H | 2.1421191  | 1.2796203  | -4.4586917 |
| H | 1.8918883  | -0.4636292 | -4.1188286 |
| C | 5.2135574  | 0.3608750  | -0.0572039 |
| C | -1.5801740 | 4.1976022  | 0.3693793  |
| H | -2.3887788 | 4.7779128  | -1.5464592 |
| H | -0.6293759 | 3.3405851  | 2.1066736  |
| C | 5.7985168  | -0.9119575 | 0.0220755  |
| C | 5.7066880  | 1.4738877  | 0.6328293  |
| H | -2.1478901 | 4.9336684  | 0.9314510  |

|   |           |            |            |
|---|-----------|------------|------------|
| C | 6.9242244 | -1.0466726 | 0.8345864  |
| C | 5.2269651 | -2.1046317 | -0.7002531 |
| C | 6.8404974 | 1.2806795  | 1.4291705  |
| C | 5.0573364 | 2.8322627  | 0.5570404  |
| C | 7.4605219 | 0.0350931  | 1.5442369  |
| H | 7.3851054 | -2.0278193 | 0.9242711  |
| H | 5.4025708 | -2.0402253 | -1.7785523 |
| H | 5.6871052 | -3.0229851 | -0.3281779 |
| H | 4.1451361 | -2.1728210 | -0.5474459 |
| H | 7.2436186 | 2.1311976  | 1.9738501  |
| H | 5.7705350 | 3.6045810  | 0.8548041  |
| H | 4.6982798 | 3.0592275  | -0.4511470 |
| H | 4.1977756 | 2.8918309  | 1.2353801  |
| C | 8.6796805 | -0.1474079 | 2.4131457  |
| H | 8.9035517 | 0.7633385  | 2.9747975  |
| H | 9.5568748 | -0.3992787 | 1.8054171  |
| H | 8.5329308 | -0.9669557 | 3.1254807  |

**TS2 : benzylic site C-H deprotonation by 2a**  
107

Energy = -2410.921402640

|   |            |            |            |
|---|------------|------------|------------|
| N | -2.7460482 | -0.7433038 | -1.6216998 |
| N | -1.6601588 | -0.2580340 | -1.0081718 |
| N | -3.7585264 | -0.2344593 | -0.9262816 |
| C | -1.9567593 | 0.5500465  | 0.0791488  |
| C | -0.3632570 | -0.6878821 | -1.5250890 |
| C | -5.1149817 | -0.5731637 | -1.2799938 |
| C | -3.3482923 | 0.5539301  | 0.0948929  |
| C | -1.0165535 | 1.1470345  | 1.0167036  |
| H | -0.0230941 | 0.0214523  | -2.2808753 |
| H | -0.4953950 | -1.6922163 | -1.9307556 |
| H | 0.3433119  | -0.6956606 | -0.6978448 |
| C | -5.6631040 | -0.0150953 | -2.4401146 |
| C | -5.8172730 | -1.4384449 | -0.4293601 |
| H | -4.0447755 | 1.0545862  | 0.7454903  |
| C | -1.6260473 | 1.6798828  | 2.2670749  |
| N | 0.0945414  | 1.9255134  | 0.5599506  |
| C | -6.9856026 | -0.3542697 | -2.7432364 |
| C | -4.8713125 | 0.9119686  | -3.3266452 |
| C | -7.1331189 | -1.7448484 | -0.7827118 |
| C | -5.1887953 | -2.0176281 | 0.8137085  |
| C | -2.5008184 | 0.8902039  | 3.0395013  |
| C | -1.2597839 | 2.9387824  | 2.7749376  |
| N | 0.2646910  | 1.9426109  | -0.7220430 |
| C | -7.7321821 | -1.2148384 | -1.9323323 |
| H | -7.4420166 | 0.0712680  | -3.6339187 |
| H | -4.1246717 | 0.3570149  | -3.9050478 |
| H | -5.5352602 | 1.4250918  | -4.0259049 |
| H | -4.3339468 | 1.6648942  | -2.7403960 |
| H | -7.7007063 | -2.4179357 | -0.1439604 |
| H | -5.7742691 | -2.8683688 | 1.1696943  |
| H | -4.1633659 | -2.3547667 | 0.6357939  |
| H | -5.1527794 | -1.2770235 | 1.6215964  |
| C | -3.0156338 | 1.3526335  | 4.2470728  |
| H | -2.7587257 | -0.1089330 | 2.6978027  |

|   |            |            |            |
|---|------------|------------|------------|
| C | -1.7659546 | 3.3965640  | 3.9921270  |
| H | -0.5668585 | 3.5447788  | 2.2018451  |
| C | 1.3894397  | 2.5326023  | -1.2160458 |
| C | -9.1504108 | -1.5803394 | -2.2938689 |
| C | -2.6520441 | 2.6127839  | 4.7342962  |
| H | -3.6897416 | 0.7209358  | 4.8205463  |
| H | -1.4699252 | 4.3760836  | 4.3603366  |
| C | 2.4109460  | 3.1811911  | -0.3692816 |
| C | 1.5971938  | 2.4542789  | -2.6325840 |
| H | -9.8108955 | -1.5026377 | -1.4239455 |
| H | -9.2022900 | -2.6160418 | -2.6512835 |
| H | -9.5359089 | -0.9307236 | -3.0841707 |
| H | -3.0467073 | 2.9717166  | 5.6808513  |
| C | 3.7830350  | 2.9177201  | -0.5383619 |
| C | 2.0412769  | 4.0556720  | 0.6722969  |
| O | 2.5637000  | 2.9095960  | -3.2653315 |
| O | 0.5825557  | 1.7882630  | -3.3189728 |
| C | 4.7390804  | 3.4884860  | 0.3004119  |
| H | 4.0954379  | 2.2510819  | -1.3345679 |
| C | 2.9956867  | 4.6324518  | 1.5077332  |
| H | 0.9918245  | 4.2845274  | 0.8180177  |
| C | 0.7825995  | 1.7159718  | -4.7410502 |
| C | 4.3533562  | 4.3473798  | 1.3331800  |
| H | 5.7905546  | 3.2535127  | 0.1529071  |
| H | 2.6791353  | 5.3065705  | 2.3003983  |
| H | 0.8468378  | 2.7165669  | -5.1783358 |
| H | 1.6964424  | 1.1641615  | -4.9825719 |
| H | -0.0919033 | 1.1882250  | -5.1262510 |
| H | 5.0980906  | 4.7889224  | 1.9903408  |
| H | -0.3350779 | 0.0045064  | 1.5703304  |
| C | 0.3895409  | -1.0112380 | 2.2681393  |
| C | 1.6832991  | -1.0422432 | 1.6428848  |
| C | -0.5007619 | -2.1873886 | 2.2663198  |
| H | 0.4123167  | -0.5061046 | 3.2360067  |
| N | 2.6261816  | -0.0374243 | 1.8329694  |
| C | 2.3060338  | -1.8759795 | 0.7099781  |
| C | -1.3158791 | -2.4289143 | 3.3920674  |
| C | -0.6771623 | -3.0361322 | 1.1546988  |
| N | 3.7373437  | -0.1977801 | 1.1097551  |
| C | 2.4663208  | 1.1704377  | 2.6345965  |
| N | 3.5164855  | -1.3163644 | 0.4378109  |
| H | 2.0074963  | -2.8049119 | 0.2577127  |
| C | -2.2486020 | -3.4614814 | 3.4103593  |
| H | -1.2128000 | -1.7821527 | 4.2602054  |
| C | -1.6094739 | -4.0728464 | 1.1734350  |
| H | -0.1036258 | -2.8765373 | 0.2480638  |
| H | 3.3888763  | 1.7416880  | 2.5475457  |
| H | 2.2778106  | 0.8921379  | 3.6743132  |
| H | 1.6270643  | 1.7402385  | 2.2127378  |
| C | 4.5172879  | -1.8051082 | -0.4825584 |
| C | -2.4029041 | -4.2973434 | 2.2998730  |
| H | -2.8580044 | -3.6165895 | 4.2971350  |
| H | -1.7211622 | -4.7029183 | 0.2946482  |
| C | 4.3870850  | -1.4862864 | -1.8370601 |
| C | 5.5688691  | -2.5758929 | 0.0341167  |

|   |            |            |            |   |            |            |            |
|---|------------|------------|------------|---|------------|------------|------------|
| H | -3.1322133 | -5.1019541 | 2.3103080  | H | 2.0690210  | 1.9053704  | -0.4248889 |
| C | 5.3716668  | -1.9811880 | -2.7016702 | C | 0.1316930  | 3.1924989  | 2.6565654  |
| C | 3.2431883  | -0.6608784 | -2.3668104 | H | -0.2493311 | 1.1254738  | 3.0986503  |
| C | 6.5191974  | -3.0452248 | -0.8721836 | C | -2.1853804 | -1.5392409 | 1.5430673  |
| C | 5.6699362  | -2.8780408 | 1.5073952  | C | 10.0149327 | -0.3563415 | -0.8397060 |
| C | 6.4364675  | -2.7585879 | -2.2422448 | C | 0.7458294  | 4.1054386  | 1.7952782  |
| H | 5.3024626  | -1.7425750 | -3.7605517 | H | 1.9252674  | 4.3224207  | 0.0034752  |
| H | 2.8353963  | 0.0188842  | -1.6155042 | H | -0.4352876 | 3.5503102  | 3.5126291  |
| H | 3.5693486  | -0.0609019 | -3.2197666 | C | -3.3305983 | -1.0672359 | 2.3454226  |
| H | 2.4289563  | -1.3099442 | -2.7115496 | C | -2.1718009 | -2.7728562 | 0.9056666  |
| H | 7.3454960  | -3.6457220 | -0.4982338 | H | 10.1728164 | 0.4324663  | -1.5812565 |
| H | 6.5234515  | -3.5304876 | 1.7034094  | H | 10.4307674 | -1.2845833 | -1.2515152 |
| H | 5.7959580  | -1.9584848 | 2.0892241  | H | 10.5829981 | -0.1104936 | 0.0620468  |
| H | 4.7647798  | -3.3748994 | 1.8748852  | H | 0.6505432  | 5.1739077  | 1.9662957  |
| C | 7.4840300  | -3.2779239 | -3.1954906 | C | -4.6559894 | -1.5251701 | 2.1771308  |
| H | 7.5192045  | -4.3733060 | -3.1767430 | C | -3.1301971 | -0.0320487 | 3.2839859  |
| H | 8.4799011  | -2.9162779 | -2.9150827 | O | -1.3765659 | -3.1410090 | -0.0841614 |
| H | 7.2776569  | -2.9580015 | -4.2201524 | O | -3.0542550 | -3.7310468 | 1.3465392  |

**TS3a** : H<sup>+</sup> transfer from 2aH<sup>+</sup> to O=C of B<sup>-</sup>  
107

Energy = -2410.914370879

|   |            |            |            |   |            |            |            |
|---|------------|------------|------------|---|------------|------------|------------|
| N | 3.9159647  | -2.2759167 | 0.2837325  | H | -2.1248391 | 0.3491771  | 3.4186824  |
| N | 2.6086355  | -2.0550230 | 0.5683809  | C | -3.4066546 | -4.7679112 | 0.4038470  |
| N | 4.4513291  | -1.0640775 | 0.3157965  | C | -5.4888322 | 0.0473584  | 3.8294244  |
| C | 2.3110012  | -0.7013333 | 0.7811370  | H | -6.7183097 | -1.3518852 | 2.7390297  |
| C | 1.7642222  | -3.2337467 | 0.7332371  | H | -3.9874865 | 1.3122101  | 4.7237678  |
| C | 5.8551201  | -0.8940423 | 0.0246719  | H | -3.9179369 | -4.3370079 | -0.4629424 |
| C | 3.5659652  | -0.0857638 | 0.6089641  | H | -2.5189850 | -5.3127136 | 0.0760860  |
| C | 1.0496662  | -0.1403511 | 1.0936953  | H | -4.0796604 | -5.4288014 | 0.9516101  |
| H | 1.4918425  | -3.3425636 | 1.7860377  | H | -6.3146972 | 0.4703302  | 4.3952820  |
| H | 2.3552548  | -4.0878304 | 0.3983133  | H | -1.6482354 | -2.5901153 | -1.0337747 |
| H | 0.8352344  | -3.1241177 | 0.1718121  | C | -2.1464065 | -1.9099325 | -2.3272328 |
| C | 6.7799209  | -1.1217152 | 1.0498955  | C | -1.6922141 | -0.5693821 | -2.1255277 |
| C | 6.2187343  | -0.4899995 | -1.2653734 | C | -3.5745231 | -2.2397838 | -2.3115493 |
| H | 3.8704149  | 0.9425007  | 0.6957191  | H | -1.5678103 | -2.4569687 | -3.0743572 |
| C | 0.9470399  | 1.3200366  | 1.3213022  | N | -0.3482374 | -0.2376004 | -2.1467585 |
| N | 0.0310279  | -1.0401191 | 1.2136941  | C | -2.3003656 | 0.6470903  | -1.8136036 |
| C | 8.1300471  | -0.9273834 | 0.7440754  | C | -4.0722623 | -3.2643424 | -3.1452602 |
| C | 6.3414534  | -1.5578665 | 2.4243684  | C | -4.4831549 | -1.6512274 | -1.4047675 |
| C | 7.5813889  | -0.3130334 | -1.5187116 | N | -0.0970658 | 1.0468818  | -1.8794376 |
| C | 5.1862318  | -0.2521706 | -2.3385205 | C | 0.7586022  | -1.1409606 | -2.4108869 |
| C | 1.5566468  | 2.2554731  | 0.4654347  | N | -1.3001229 | 1.5605513  | -1.6712943 |
| C | 0.2305716  | 1.8234837  | 2.4240184  | H | -3.3342086 | 0.9200363  | -1.7087755 |
| N | -1.1577974 | -0.5826849 | 1.4481018  | C | -5.4030082 | -3.6712426 | -3.0844654 |
| C | 8.5484915  | -0.5278006 | -0.5299202 | H | -3.3930888 | -3.7487952 | -3.8439547 |
| H | 8.8703662  | -1.0896552 | 1.5242034  | C | -5.8163179 | -2.0521394 | -1.3533302 |
| H | 5.9473960  | -2.5798078 | 2.4026338  | H | -4.1293376 | -0.9119556 | -0.6929603 |
| H | 7.1835969  | -1.5278681 | 3.1192004  | H | 0.7730368  | -1.4227221 | -3.4672019 |
| H | 5.5471285  | -0.9114207 | 2.8131349  | H | 0.6281630  | -2.0317992 | -1.7941322 |
| H | 7.8918028  | -0.0007882 | -2.5132857 | H | 1.6770704  | -0.6227416 | -2.1422162 |
| H | 5.6678199  | -0.1490267 | -3.3133072 | C | -1.4301193 | 2.9549695  | -1.3343298 |
| H | 4.4721913  | -1.0807394 | -2.3904057 | C | -6.2916759 | -3.0636363 | -2.1921851 |
| H | 4.6167440  | 0.6644170  | -2.1438407 | H | -5.7497407 | -4.4664252 | -3.7401820 |
| C | 1.4623087  | 3.6265531  | 0.6982588  | H | -6.4838327 | -1.5816836 | -0.6356473 |
|   |            |            |            | C | -2.1677972 | 3.3018657  | -0.1927228 |

|   |            |            |            |
|---|------------|------------|------------|
| C | -0.8079084 | 3.9065606  | -2.1610577 |
| H | -7.3299371 | -3.3792756 | -2.1447490 |
| C | -2.2543288 | 4.6644669  | 0.1143876  |
| C | -2.8225602 | 2.2913179  | 0.7111588  |
| C | -0.9308663 | 5.2480032  | -1.7991254 |
| C | -0.0365210 | 3.5362860  | -3.4035631 |
| C | -1.6434459 | 5.6474832  | -0.6629641 |
| H | -2.7999396 | 4.9548034  | 1.0091343  |
| H | -2.1941591 | 1.4076888  | 0.8770198  |
| H | -3.0243366 | 2.7486439  | 1.6823876  |
| H | -3.7844917 | 1.9523037  | 0.3072110  |
| H | -0.4567586 | 5.9992099  | -2.4273377 |
| H | 0.0702560  | 4.4142868  | -4.0459028 |
| H | 0.9632773  | 3.1676379  | -3.1524923 |
| H | -0.5379967 | 2.7468964  | -3.9725055 |
| C | -1.7388911 | 7.1053300  | -0.2883783 |
| H | -2.2463237 | 7.6807630  | -1.0716345 |
| H | -0.7412505 | 7.5414522  | -0.1610737 |
| H | -2.2927259 | 7.2360989  | 0.6451571  |

**TS30 : TS3 but Ph trans to pro-carbenic C-H**  
107

Energy = -2410.920609864

|   |            |            |            |
|---|------------|------------|------------|
| N | 2.9797583  | -0.4134659 | -2.8793538 |
| N | 1.6722425  | -0.0323301 | -2.8043448 |
| N | 3.4851124  | 0.0156552  | -1.7240679 |
| C | 1.3675701  | 0.6700047  | -1.6303711 |
| C | 0.7452616  | -0.5647381 | -3.7850469 |
| C | 4.8919072  | -0.1673823 | -1.4465466 |
| C | 2.5953023  | 0.6578785  | -0.9407882 |
| C | 0.1189136  | 1.1560015  | -1.1836671 |
| H | -0.1621609 | -0.8739007 | -3.2590774 |
| H | 1.2228158  | -1.4172730 | -4.2678843 |
| H | 0.4697548  | 0.1866230  | -4.5297497 |
| C | 5.3112427  | -1.3778139 | -0.8855331 |
| C | 5.7643013  | 0.8886960  | -1.7403862 |
| H | 2.8656878  | 1.0692493  | 0.0172350  |
| C | -0.9252911 | 1.6663795  | -2.0583516 |
| N | 0.1138684  | 1.2373824  | 0.2166419  |
| C | 6.6745081  | -1.5132621 | -0.6061753 |
| C | 4.3408514  | -2.4930736 | -0.5936111 |
| C | 7.1154813  | 0.7006453  | -1.4420179 |
| C | 5.2686735  | 2.1753411  | -2.3503932 |
| C | -2.2893163 | 1.7707794  | -1.6777024 |
| C | -0.5843012 | 2.1668095  | -3.3417907 |
| N | -0.9450093 | 1.6999708  | 0.8291106  |
| C | 7.5872924  | -0.4879139 | -0.8718611 |
| H | 7.0275908  | -2.4441317 | -0.1686513 |
| H | 3.8588675  | -2.8452159 | -1.5118581 |
| H | 4.8564624  | -3.3362278 | -0.1295659 |
| H | 3.5500189  | -2.1595178 | 0.0875543  |
| H | 7.8147473  | 1.5033468  | -1.6650837 |
| H | 6.1112598  | 2.7926658  | -2.6692358 |
| H | 4.6298371  | 1.9833782  | -3.2186915 |
| H | 4.6781802  | 2.7540022  | -1.6305453 |

|   |            |            |            |
|---|------------|------------|------------|
| C | -3.2398162 | 2.2891968  | -2.5533780 |
| H | -2.5892909 | 1.4647603  | -0.6859569 |
| C | -1.5434040 | 2.6680201  | -4.2141987 |
| H | 0.4617210  | 2.1969823  | -3.6359701 |
| C | -0.9363602 | 1.7448337  | 2.1873405  |
| C | 9.0496704  | -0.6496491 | -0.5393098 |
| C | -2.8887133 | 2.7267679  | -3.8324318 |
| H | -4.2769428 | 2.3375426  | -2.2302533 |
| H | -1.2356060 | 3.0384315  | -5.1891727 |
| C | 0.2619567  | 1.7629842  | 3.0407561  |
| C | -2.2560343 | 1.8766303  | 2.7662102  |
| H | 9.3199396  | -0.0252161 | 0.3209483  |
| H | 9.6809000  | -0.3384466 | -1.3782893 |
| H | 9.2858653  | -1.6877557 | -0.2909951 |
| H | -3.6393153 | 3.1221001  | -4.5109804 |
| C | 1.5094853  | 2.2068738  | 2.5435855  |
| C | 0.2143333  | 1.3893808  | 4.4000156  |
| O | -2.5509671 | 2.1638572  | 3.9323484  |
| O | -3.2661070 | 1.6004680  | 1.8455448  |
| C | 2.6342714  | 2.2805653  | 3.3593694  |
| H | 1.5867007  | 2.5139148  | 1.5069324  |
| C | 1.3435519  | 1.4596205  | 5.2112408  |
| H | -0.7198070 | 1.0354377  | 4.8152360  |
| C | -4.5995001 | 1.8421416  | 2.3321287  |
| C | 2.5651557  | 1.9040720  | 4.7035723  |
| H | 3.5735262  | 2.6373586  | 2.9419956  |
| H | 1.2699503  | 1.1432952  | 6.2486955  |
| H | -4.8082445 | 1.2377020  | 3.2194346  |
| H | -4.7357232 | 2.8989648  | 2.5802635  |
| H | -5.2578501 | 1.5574270  | 1.5095715  |
| H | 3.4473710  | 1.9459734  | 5.3366056  |
| H | 0.5529071  | 0.1444709  | 0.7239109  |
| C | 0.5565605  | -1.3016439 | 1.0000200  |
| C | -0.6291536 | -1.6419129 | 0.2487611  |
| C | 0.5887773  | -1.5408596 | 2.4634105  |
| H | 1.4605833  | -1.6713263 | 0.5125871  |
| N | -0.6759690 | -2.5317035 | -0.8071684 |
| C | -1.9184204 | -1.1184070 | 0.2795497  |
| C | 1.8267314  | -1.5016808 | 3.1316543  |
| C | -0.5543297 | -1.8190706 | 3.2331457  |
| N | -1.8613061 | -2.5795736 | -1.4219494 |
| C | 0.4127859  | -3.3721164 | -1.2947532 |
| N | -2.6010570 | -1.7127534 | -0.7356538 |
| H | -2.3464235 | -0.3266247 | 0.8760867  |
| C | 1.9217858  | -1.7529698 | 4.4968243  |
| H | 2.7247745  | -1.2627363 | 2.5660715  |
| C | -0.4601580 | -2.0658676 | 4.6015978  |
| H | -1.5307298 | -1.8515565 | 2.7571561  |
| H | 0.8378490  | -3.9177759 | -0.4506145 |
| H | 1.1839509  | -2.7535180 | -1.7590297 |
| H | -0.0031429 | -4.0632096 | -2.0254642 |
| C | -3.9696235 | -1.4555558 | -1.1058505 |
| C | 0.7786952  | -2.0446086 | 5.2447157  |
| H | 2.8930570  | -1.7073019 | 4.9821246  |
| H | -1.3634981 | -2.2784072 | 5.1682638  |

|   |            |            |            |
|---|------------|------------|------------|
| C | -4.2656903 | -1.0978500 | -2.4332440 |
| C | -4.9444039 | -1.5309348 | -0.0997061 |
| H | 0.8499458  | -2.2325529 | 6.3121732  |
| C | -5.5940481 | -0.7849620 | -2.7232619 |
| C | -3.2242027 | -1.0176229 | -3.5191552 |
| C | -6.2572602 | -1.2042277 | -0.4543453 |
| C | -4.6414637 | -1.9601667 | 1.3157377  |
| C | -6.6010712 | -0.8222482 | -1.7521787 |
| H | -5.8414483 | -0.4871014 | -3.7395274 |
| H | -2.8865747 | -2.0132881 | -3.8222755 |
| H | -3.6420187 | -0.5083035 | -4.3899853 |
| H | -2.3531414 | -0.4482623 | -3.1826219 |
| H | -7.0290474 | -1.2593854 | 0.3097404  |
| H | -5.5526874 | -2.3333767 | 1.7890587  |
| H | -3.8856912 | -2.7504518 | 1.3497879  |
| H | -4.2737358 | -1.1228140 | 1.9191137  |
| C | -8.0235022 | -0.4697925 | -2.1073400 |
| H | -8.6572985 | -0.4429155 | -1.2171164 |
| H | -8.4440210 | -1.2041192 | -2.8046597 |
| H | -8.0727463 | 0.5084037  | -2.5982623 |

**TS3** : H<sup>+</sup> transfer from **2aH<sup>+</sup>** to N=N of **B<sup>-</sup>**  
107

Energy = -2410.914786269

|   |            |            |            |
|---|------------|------------|------------|
| N | 2.0727194  | -2.9832121 | -0.8170013 |
| N | 0.8198298  | -2.6071647 | -0.3927964 |
| N | 2.8775350  | -2.2152275 | -0.0914713 |
| C | 0.8462249  | -1.6239875 | 0.6198508  |
| C | -0.2774282 | -3.4621781 | -0.8233230 |
| C | 4.3093756  | -2.4055036 | -0.1682527 |
| C | 2.2373301  | -1.3921720 | 0.7584972  |
| C | -0.2363491 | -1.0224253 | 1.2761441  |
| H | -0.6031213 | -4.1036338 | 0.0020289  |
| H | 0.1024899  | -4.0786749 | -1.6388029 |
| H | -1.1206727 | -2.8637762 | -1.1594947 |
| C | 4.8680376  | -3.3932963 | 0.6530792  |
| C | 5.0712149  | -1.5993824 | -1.0222990 |
| H | 2.7819327  | -0.7252907 | 1.4015850  |
| C | 0.0029573  | -0.0922687 | 2.3820841  |
| N | -1.5268741 | -1.2963708 | 0.7867498  |
| C | 6.2543645  | -3.5639175 | 0.5986747  |
| C | 4.0132728  | -4.2329173 | 1.5674533  |
| C | 6.4533031  | -1.8074279 | -1.0326997 |
| C | 4.4431845  | -0.5685473 | -1.9226235 |
| C | -0.8009931 | 1.0557404  | 2.5775550  |
| C | 1.0587540  | -0.2887988 | 3.3004746  |
| N | -2.5341290 | -0.9933537 | 1.5861662  |
| C | 7.0614757  | -2.7816451 | -0.2334398 |
| H | 6.7116980  | -4.3255421 | 1.2260398  |
| H | 3.2128065  | -4.7318785 | 1.0114660  |
| H | 4.6202894  | -4.9926891 | 2.0641582  |
| H | 3.5375873  | -3.6164937 | 2.3394939  |
| H | 7.0665538  | -1.1898560 | -1.6854034 |
| H | 5.1871284  | 0.1673805  | -2.2368336 |
| H | 4.0406618  | -1.0432311 | -2.8249210 |

|   |            |            |            |
|---|------------|------------|------------|
| H | 3.6195101  | -0.0393591 | -1.4372548 |
| C | -0.5055935 | 1.9854868  | 3.5682490  |
| H | -1.6749992 | 1.2020220  | 1.9561899  |
| C | 1.3540209  | 0.6439547  | 4.2923807  |
| H | 1.6414398  | -1.2043489 | 3.2484582  |
| C | -3.7854830 | -1.2363736 | 1.1734734  |
| C | 8.5573062  | -2.9760231 | -0.2664347 |
| C | 0.5849328  | 1.8022136  | 4.4258522  |
| H | -1.1361355 | 2.8650616  | 3.6743299  |
| H | 2.1809478  | 0.4561940  | 4.9732258  |
| C | -4.1663565 | -2.1319450 | 0.0625797  |
| C | -4.8390137 | -0.5780864 | 1.9250830  |
| H | 9.0746484  | -2.0726508 | 0.0772196  |
| H | 8.9029326  | -3.1800930 | -1.2860475 |
| H | 8.8606023  | -3.8084752 | 0.3738754  |
| H | 0.8128058  | 2.5335383  | 5.1960098  |
| C | -3.5337043 | -3.3813298 | -0.0830989 |
| C | -5.1891976 | -1.8033099 | -0.8422967 |
| O | -6.0518997 | -0.7881723 | 1.8082036  |
| O | -4.3699888 | 0.3804415  | 2.7946794  |
| C | -3.8930555 | -4.2574389 | -1.1032822 |
| H | -2.7637097 | -3.6639097 | 0.6272849  |
| C | -5.5491552 | -2.6792030 | -1.8651312 |
| H | -5.6901078 | -0.8470210 | -0.7466263 |
| C | -5.3975613 | 1.0447073  | 3.5536835  |
| C | -4.9019776 | -3.9082334 | -2.0077693 |
| H | -3.3940013 | -5.2199434 | -1.1884420 |
| H | -6.3331805 | -2.3937874 | -2.5623251 |
| H | -6.0861519 | 1.5737956  | 2.8880656  |
| H | -5.9639815 | 0.3294162  | 4.1574545  |
| H | -4.8669184 | 1.7501399  | 4.1947608  |
| H | -5.1827374 | -4.5893105 | -2.8069356 |
| H | -1.6767422 | -0.9248864 | -0.4411150 |
| C | -1.7171889 | -0.1629894 | -1.6843395 |
| C | -0.5633529 | 0.6991556  | -1.6045440 |
| C | -3.0346944 | 0.5380160  | -1.7449191 |
| H | -1.6180720 | -0.8996188 | -2.4848895 |
| N | 0.6353022  | 0.5017942  | -2.2702535 |
| C | -0.3315047 | 1.8843505  | -0.9010935 |
| C | -3.8710279 | 0.3633401  | -2.8592626 |
| C | -3.4929858 | 1.3691537  | -0.7086951 |
| N | 1.5563069  | 1.4511809  | -2.0250770 |
| C | 0.9656430  | -0.5564213 | -3.2183298 |
| N | 0.9313381  | 2.2757770  | -1.1944945 |
| H | -0.9560803 | 2.4535308  | -0.2366716 |
| C | -5.1088489 | 0.9997729  | -2.9427370 |
| H | -3.5464627 | -0.2905710 | -3.6652289 |
| C | -4.7300439 | 2.0045855  | -0.7873305 |
| H | -2.9077348 | 1.4699203  | 0.1998654  |
| H | 0.0579843  | -0.8232174 | -3.7610448 |
| H | 1.3583407  | -1.4324715 | -2.6968691 |
| H | 1.7100207  | -0.1638774 | -3.9095166 |
| C | 1.5714077  | 3.5043862  | -0.7750946 |
| C | -5.5456616 | 1.8286018  | -1.9079882 |
| H | -5.7370229 | 0.8401216  | -3.8154813 |

|   |            |           |            |
|---|------------|-----------|------------|
| H | -5.0672576 | 2.6220629 | 0.0409341  |
| C | 2.3784551  | 3.4938975 | 0.3655191  |
| C | 1.3227693  | 4.6547756 | -1.5368084 |
| H | -6.5133823 | 2.3188025 | -1.9661017 |
| C | 2.9521390  | 4.7109378 | 0.7483037  |
| C | 2.6311126  | 2.2317398 | 1.1435547  |
| C | 1.9236592  | 5.8407157 | -1.1120254 |
| C | 0.4412289  | 4.6164128 | -2.7591199 |
| C | 2.7381746  | 5.8883625 | 0.0268543  |
| H | 3.5799883  | 4.7332999 | 1.6358479  |
| H | 3.2366753  | 1.5341358 | 0.5534445  |
| H | 3.1660583  | 2.4535248 | 2.0686326  |
| H | 1.6972912  | 1.7240932 | 1.4032180  |
| H | 1.7471334  | 6.7484186 | -1.6846860 |
| H | 0.4473477  | 5.5860482 | -3.2612750 |
| H | 0.7811912  | 3.8555234 | -3.4699447 |
| H | -0.5951075 | 4.3770926 | -2.4936470 |
| C | 3.3773435  | 7.1856117 | 0.4558063  |
| H | 2.6327586  | 7.9861910 | 0.5230111  |
| H | 4.1327821  | 7.5043773 | -0.2723672 |
| H | 3.8650913  | 7.0820959 | 1.4286183  |

**TS4a** : N-inversion of mNHO-like C  
64

Energy = -1509.447272084

|   |            |            |            |
|---|------------|------------|------------|
| N | -2.3992938 | -1.6596570 | 0.5828905  |
| N | -1.1062736 | -1.4240076 | 0.2558534  |
| N | -3.0196583 | -0.5601603 | 0.1826917  |
| C | -0.9034504 | -0.1973743 | -0.3940925 |
| C | -0.1005812 | -2.3729827 | 0.7182976  |
| C | -4.4490088 | -0.4426469 | 0.3636969  |
| C | -2.2063267 | 0.3505023  | -0.3983691 |
| C | 0.3124555  | 0.2684934  | -0.9069612 |
| H | 0.2915178  | -2.9694800 | -0.1078667 |
| H | -0.5815544 | -3.0212848 | 1.4501781  |
| H | 0.7163287  | -1.8160666 | 1.1838517  |
| C | -5.2890931 | -0.9459013 | -0.6380420 |
| C | -4.9191390 | 0.1791322  | 1.5243820  |
| H | -2.5918538 | 1.2672916  | -0.8094819 |
| C | 0.6006751  | 1.6417354  | -1.2405170 |
| N | 1.2833369  | -0.7355079 | -1.2727592 |
| C | -6.6647174 | -0.8063130 | -0.4439473 |
| C | -4.7322537 | -1.6090088 | -1.8719993 |
| C | -6.3060456 | 0.2936885  | 1.6680334  |
| C | -3.9755314 | 0.6973515  | 2.5794194  |
| C | -0.1183211 | 2.7283197  | -0.6799601 |
| C | 1.6675663  | 1.9726960  | -2.1159507 |
| N | 2.4580812  | -0.8254482 | -0.8013496 |
| C | -7.1903099 | -0.1907088 | 0.6994362  |
| H | -7.3401592 | -1.1877292 | -1.2065420 |
| H | -4.1246457 | -2.4817152 | -1.6096453 |
| H | -5.5432868 | -1.9357387 | -2.5263137 |
| H | -4.0908938 | -0.9220537 | -2.4357305 |
| H | -6.7006107 | 0.7730694  | 2.5609108  |
| H | -4.5348463 | 1.1518262  | 3.3998397  |

|   |            |            |            |
|---|------------|------------|------------|
| H | -3.3588142 | -0.1116047 | 2.9863181  |
| H | -3.2939986 | 1.4508991  | 2.1690550  |
| C | 0.1893406  | 4.0468100  | -0.9968300 |
| H | -0.9009750 | 2.5326520  | 0.0474335  |
| C | 1.9730124  | 3.2946828  | -2.4215959 |
| H | 2.2636927  | 1.1769751  | -2.5521852 |
| C | 3.6356760  | -0.8914534 | -0.3166959 |
| C | -8.6824667 | -0.0600896 | 0.8797864  |
| C | 1.2355141  | 4.3499367  | -1.8751370 |
| H | -0.3841996 | 4.8494521  | -0.5385562 |
| H | 2.7986209  | 3.5035043  | -3.0981207 |
| C | 4.0681783  | -0.0397537 | 0.8350824  |
| C | 4.5483095  | -1.8769448 | -0.9905714 |
| H | -9.1356875 | 0.4566680  | 0.0264235  |
| H | -8.9223230 | 0.4977724  | 1.7887422  |
| H | -9.1534966 | -1.0476478 | 0.9489161  |
| H | 1.4776638  | 5.3809595  | -2.1157026 |
| C | 5.0396058  | -0.4420526 | 1.7671553  |
| C | 3.4190733  | 1.1888351  | 1.0435199  |
| O | 4.1690249  | -2.7343047 | -1.7779019 |
| O | 5.8619528  | -1.6940956 | -0.6955764 |
| C | 5.3538642  | 0.3634296  | 2.8632713  |
| H | 5.5495242  | -1.3904623 | 1.6411306  |
| C | 3.7386902  | 1.9956726  | 2.1316573  |
| H | 2.6577291  | 1.5039679  | 0.3367748  |
| C | 6.7740016  | -2.6067853 | -1.3580137 |
| C | 4.7112478  | 1.5884306  | 3.0504562  |
| H | 6.1033452  | 0.0279333  | 3.5758489  |
| H | 3.2291176  | 2.9470744  | 2.2626259  |
| H | 6.7093835  | -2.4798442 | -2.4412580 |
| H | 7.7637366  | -2.3342713 | -0.9931309 |
| H | 6.5300580  | -3.6384125 | -1.0941389 |
| H | 4.9621200  | 2.2162374  | 3.9012050  |
| H | 1.0468182  | -1.3569151 | -2.0524422 |

**TS4** : N-N rotation of mNHO-like C  
64

Energy = -1509.469031662

|   |            |            |            |
|---|------------|------------|------------|
| N | 1.3900119  | -0.9762112 | -1.7615903 |
| N | 0.3173220  | -0.2673091 | -2.1941496 |
| N | 1.8201011  | -0.2677061 | -0.7198811 |
| C | 0.0381643  | 0.8543490  | -1.4032163 |
| C | -0.2124608 | -0.5905307 | -3.5143478 |
| C | 2.8979720  | -0.7807950 | 0.0932380  |
| C | 1.0866104  | 0.8361093  | -0.4671771 |
| C | -1.1503632 | 1.6156945  | -1.4533265 |
| H | -1.2211403 | -0.1885578 | -3.5896847 |
| H | -0.2236471 | -1.6752980 | -3.6271079 |
| H | 0.4303275  | -0.1438446 | -4.2803361 |
| C | 2.5701108  | -1.6523950 | 1.1412508  |
| C | 4.2043691  | -0.3779882 | -0.1962034 |
| H | 1.2819475  | 1.4534133  | 0.3920277  |
| C | -1.2231117 | 2.9968068  | -1.0702722 |
| N | -2.3141767 | 0.9567193  | -2.0204641 |
| C | 3.6238537  | -2.1268692 | 1.9244366  |

|                                                               |            |            |            |   |            |            |            |
|---------------------------------------------------------------|------------|------------|------------|---|------------|------------|------------|
| C                                                             | 1.1445453  | -2.0616105 | 1.4073498  | C | 0.7013644  | 2.9651053  | -1.7537085 |
| C                                                             | 5.2220869  | -0.8834834 | 0.6202919  | C | 3.9236056  | -0.1588365 | -0.1323991 |
| C                                                             | 4.5047343  | 0.5611278  | -1.3364643 | C | 1.4111815  | -0.1894394 | -0.1347511 |
| C                                                             | -2.4584706 | 3.6987743  | -1.0024621 | C | -1.0462283 | 0.6542258  | -0.5552653 |
| C                                                             | -0.0601385 | 3.7447858  | -0.7284612 | H | -0.1200238 | 2.7261238  | -2.4265101 |
| N                                                             | -2.3865039 | -0.4370657 | -1.5459885 | H | 1.5383899  | 3.3852299  | -2.3081412 |
| C                                                             | 4.9519325  | -1.7541944 | 1.6801906  | H | 0.3598642  | 3.6501457  | -0.9769747 |
| H                                                             | 3.3988698  | -2.8042192 | 2.7454788  | C | 4.3308639  | -1.3016041 | -0.8360898 |
| H                                                             | 0.7192316  | -2.5929272 | 0.5495785  | C | 4.7073898  | 0.4760346  | 0.8373273  |
| H                                                             | 1.0935201  | -2.7187229 | 2.2780990  | H | 1.2975632  | -1.1433247 | 0.3445603  |
| H                                                             | 0.5032090  | -1.1933560 | 1.5908474  | C | -1.5915967 | 1.9582030  | -0.0001196 |
| H                                                             | 6.2493048  | -0.5889556 | 0.4179945  | N | -1.5963449 | 0.2739173  | -1.8654909 |
| H                                                             | 5.5836232  | 0.6822013  | -1.4556772 | C | -1.6555386 | -0.5580319 | 0.3930371  |
| H                                                             | 4.0903115  | 0.1847330  | -2.2777226 | C | 5.5951227  | -1.8104942 | -0.5360470 |
| H                                                             | 4.0669369  | 1.5505484  | -1.1603020 | C | 3.4588506  | -1.9530482 | -1.8800741 |
| C                                                             | -2.5258295 | 5.0091112  | -0.5384705 | C | 5.9636290  | -0.0804514 | 1.0975962  |
| H                                                             | -3.3838636 | 3.2215009  | -1.3070235 | C | 4.2298063  | 1.6973169  | 1.5807196  |
| C                                                             | -0.1394909 | 5.0479136  | -0.2603137 | C | -1.0169952 | 2.4924184  | 1.1623461  |
| H                                                             | 0.9196679  | 3.2941683  | -0.8517794 | C | -2.6791176 | 2.6172581  | -0.5797646 |
| C                                                             | -2.4091127 | -0.5706778 | -0.2596100 | N | -2.8381361 | -0.3754417 | -1.6741965 |
| C                                                             | 6.0655005  | -2.2892996 | 2.5460069  | H | -1.7493838 | 1.0572851  | -2.4986180 |
| C                                                             | -1.3766846 | 5.6975879  | -0.1426493 | C | -2.9064270 | -0.8492759 | -0.4740117 |
| H                                                             | -3.4952177 | 5.4996188  | -0.4900800 | O | -1.7163819 | -0.3487881 | 1.6448847  |
| H                                                             | 0.7767377  | 5.5732974  | -0.0003563 | C | 6.4233325  | -1.2160849 | 0.4246366  |
| C                                                             | -2.3916928 | -1.9332025 | 0.3093530  | H | 5.9411293  | -2.6911932 | -1.0719311 |
| C                                                             | -2.4515688 | 0.6151306  | 0.6719617  | H | 3.0384793  | -1.2147840 | -2.5708982 |
| H                                                             | 7.0325591  | -1.8788781 | 2.2436755  | H | 4.0417346  | -2.6731259 | -2.4579094 |
| H                                                             | 6.1196827  | -3.3821475 | 2.4791145  | H | 2.6190361  | -2.4914430 | -1.4258044 |
| H                                                             | 5.8969117  | -2.0368630 | 3.5990838  | H | 6.5930526  | 0.3858600  | 1.8515397  |
| H                                                             | -1.4364064 | 6.7201099  | 0.2183226  | H | 4.8617012  | 1.8771126  | 2.4529183  |
| C                                                             | -2.6177746 | -2.1569501 | 1.6761874  | H | 4.2657541  | 2.5868419  | 0.9425824  |
| C                                                             | -2.1126939 | -3.0315458 | -0.5242457 | H | 3.1960019  | 1.5798559  | 1.9234503  |
| O                                                             | -3.3877129 | 1.4067343  | 0.6722912  | C | -1.4922857 | 3.6834617  | 1.7068330  |
| O                                                             | -1.4440239 | 0.6275068  | 1.5773811  | H | -0.2022915 | 1.9616853  | 1.6458569  |
| C                                                             | -2.5601735 | -3.4475420 | 2.1998620  | C | -3.1614954 | 3.8070915  | -0.0307334 |
| H                                                             | -2.8322996 | -1.3224155 | 2.3354977  | H | -3.1682611 | 2.1986799  | -1.4544579 |
| C                                                             | -2.0538386 | -4.3166549 | 0.0015764  | C | -4.0478585 | -1.6611945 | -0.0481127 |
| H                                                             | -1.9317780 | -2.8520304 | -1.5785104 | C | 7.7838272  | -1.7944960 | 0.7222970  |
| C                                                             | -1.4423831 | 1.7835819  | 2.4610922  | C | -2.5651427 | 4.3495812  | 1.1082440  |
| C                                                             | -2.2749572 | -4.5295970 | 1.3667841  | H | -1.0314006 | 4.0886339  | 2.6036053  |
| H                                                             | -2.7354042 | -3.6060061 | 3.2599303  | H | -4.0063814 | 4.3078259  | -0.4954947 |
| H                                                             | -1.8277953 | -5.1563582 | -0.6494084 | C | -4.9645303 | -2.1687871 | -0.9897561 |
| H                                                             | -2.3847746 | 1.8360628  | 3.0098306  | C | -4.2478677 | -1.9499693 | 1.3131269  |
| H                                                             | -0.6061314 | 1.6200010  | 3.1390776  | H | 8.4149163  | -1.7820002 | -0.1737244 |
| H                                                             | -1.3005295 | 2.6904327  | 1.8698140  | H | 7.7007777  | -2.8379666 | 1.0463313  |
| H                                                             | -2.2211787 | -5.5339913 | 1.7770720  | H | 8.2901660  | -1.2279882 | 1.5078327  |
| H                                                             | -3.1329194 | 1.4318779  | -1.6286949 | H | -2.9363610 | 5.2791471  | 1.5305161  |
| <b>TS5 : C-C ring-closing via MeO<sup>-</sup> elimination</b> |            |            |            | C | -6.0512599 | -2.9336689 | -0.5789998 |
| 64                                                            |            |            |            | H | -4.8061128 | -1.9589587 | -2.0432564 |
| Energy = -1509.475536847                                      |            |            |            | C | -5.3377593 | -2.7202790 | 1.7187293  |
| N                                                             | 2.4893510  | 1.5523889  | -1.0301535 | H | -3.5366601 | -1.5514246 | 2.0294101  |
| N                                                             | 1.1787472  | 1.7253701  | -1.1264739 | C | -6.2445332 | -3.2137544 | 0.7789407  |
| N                                                             | 2.6134686  | 0.3795650  | -0.4154613 | H | -6.7483644 | -3.3206886 | -1.3178076 |
| C                                                             | 0.4472020  | 0.6830918  | -0.5971862 | H | -5.4805373 | -2.9344213 | 2.7748992  |
|                                                               |            |            |            | H | -7.0922198 | -3.8146092 | 1.0972782  |



|   |            |            |            |
|---|------------|------------|------------|
| O | -0.7506696 | -1.7683210 | -0.0203216 |
| C | -0.8596068 | -2.8519921 | 0.8964249  |
| H | -0.9752070 | -2.4745073 | 1.9191292  |
| H | -1.7130673 | -3.5025588 | 0.6535313  |
| H | 0.0628087  | -3.4413592 | 0.8236714  |

**TS6** : C-C ring-closing via MeOH elimination  
64

Energy = -1509.464557193

|   |            |            |            |
|---|------------|------------|------------|
| N | 2.5319975  | 1.6941936  | -0.7639996 |
| N | 1.2588226  | 2.0416387  | -0.8856691 |
| N | 2.4662984  | 0.4254224  | -0.3271093 |
| C | 0.4097398  | 1.0194807  | -0.5286487 |
| C | 0.9732916  | 3.3954987  | -1.3817915 |
| C | 3.6925875  | -0.2931572 | -0.0817846 |
| C | 1.2021354  | -0.0613395 | -0.1736300 |
| C | -1.0871174 | 1.0357122  | -0.5886193 |
| H | 0.1611408  | 3.3423970  | -2.1063928 |
| H | 1.8824600  | 3.7623929  | -1.8547194 |
| H | 0.6822920  | 4.0373348  | -0.5492799 |
| C | 4.0002995  | -1.3774056 | -0.9162916 |
| C | 4.4945725  | 0.0955498  | 0.9967098  |
| H | 0.5409789  | -1.2202811 | -0.0289700 |
| C | -1.7166210 | 2.3799693  | -0.2208890 |
| N | -1.5524705 | 0.4752401  | -1.8621915 |
| C | 5.1779082  | -2.0768377 | -0.6453994 |
| C | 3.1005648  | -1.7820978 | -2.0561175 |
| C | 5.6617949  | -0.6416636 | 1.2238218  |
| C | 4.1136103  | 1.2423690  | 1.8988633  |
| C | -1.2684456 | 3.0283690  | 0.9389572  |
| C | -2.7586288 | 2.9441255  | -0.9605803 |
| N | -2.6435049 | -0.3447809 | -1.6780693 |
| C | 6.0196163  | -1.7256866 | 0.4173770  |
| H | 5.4404664  | -2.9191894 | -1.2819074 |
| H | 2.8648825  | -0.9264500 | -2.6985466 |
| H | 3.5846808  | -2.5502636 | -2.6637872 |
| H | 2.1488511  | -2.1810447 | -1.6871572 |
| H | 6.2993802  | -0.3639392 | 2.0601106  |
| H | 4.7747479  | 1.2743347  | 2.7670299  |
| H | 4.1833887  | 2.2018891  | 1.3763827  |
| H | 3.0818731  | 1.1386208  | 2.2535563  |
| C | -1.8278264 | 4.2435930  | 1.3276448  |
| H | -0.4859888 | 2.5720792  | 1.5388590  |
| C | -3.3213445 | 4.1607471  | -0.5672835 |
| H | -3.1486382 | 2.4380402  | -1.8387281 |
| C | -2.7475472 | -0.6992465 | -0.4245302 |
| C | 7.2803785  | -2.5095246 | 0.6868901  |
| C | -2.8539418 | 4.8172512  | 0.5715446  |
| H | -1.4663222 | 4.7406811  | 2.2235880  |
| H | -4.1287983 | 4.5907049  | -1.1532591 |
| C | -3.7244270 | -1.6924242 | 0.0213474  |
| C | -1.7486235 | -0.0012340 | 0.4217590  |
| H | 7.9340822  | -2.5143429 | -0.1928152 |
| H | 7.0462893  | -3.5542009 | 0.9228832  |
| H | 7.8364073  | -2.0848794 | 1.5269997  |

|   |            |            |            |
|---|------------|------------|------------|
| H | -3.2889066 | 5.7652316  | 0.8757473  |
| C | -4.4431388 | -2.4520640 | -0.9207760 |
| C | -3.9615631 | -1.9097308 | 1.3895156  |
| O | -1.6219577 | 0.0473587  | 1.6338283  |
| O | -0.3848253 | -2.0551238 | -0.0220619 |
| C | -5.3774493 | -3.3949831 | -0.5040611 |
| H | -4.2524660 | -2.2970332 | -1.9784048 |
| C | -4.8975761 | -2.8591259 | 1.8010518  |
| H | -3.4043705 | -1.3351953 | 2.1201874  |
| C | -0.3225333 | -2.7076974 | 1.2262403  |
| C | -5.6097393 | -3.6042732 | 0.8602701  |
| H | -5.9224465 | -3.9759549 | -1.2434054 |
| H | -5.0691043 | -3.0173195 | 2.8626405  |
| H | -0.8431908 | -2.1203358 | 2.0114236  |
| H | -0.8018235 | -3.7026145 | 1.1672785  |
| H | 0.7257595  | -2.8506077 | 1.5698779  |
| H | -6.3367406 | -4.3449731 | 1.1835286  |
| H | -1.6900525 | 1.1159494  | -2.6385350 |

**TS7** : intramolecular H<sup>+</sup> transfer from N-H  
58

Energy = -1393.651977531

|   |            |            |            |
|---|------------|------------|------------|
| N | 0.8050028  | 1.0701249  | 1.5624720  |
| N | 2.0708156  | 0.6661362  | 1.5947621  |
| O | -2.6354492 | 0.3452513  | 1.7631728  |
| N | -1.9141436 | -0.8377134 | -1.4468728 |
| C | 6.0037490  | -1.6361776 | -0.4920745 |
| N | 2.2406949  | 0.0455933  | 0.4119122  |
| C | 5.8358925  | -0.2492452 | -0.4498414 |
| C | -4.4668936 | -2.0058230 | 1.0008576  |
| C | -1.5136009 | 2.3868781  | -0.3695134 |
| C | 1.1250913  | 0.0360745  | -0.3808714 |
| C | -2.6316560 | 2.9972353  | 0.2041320  |
| C | -5.0197655 | -3.7496834 | -1.1065634 |
| C | -0.6610855 | 3.1408338  | -1.1880259 |
| C | -0.9242330 | 4.4866216  | -1.4303771 |
| C | -4.0247936 | -2.7875456 | -1.2472191 |
| C | 3.5326903  | -0.5247770 | 0.1155329  |
| C | 3.6450119  | -1.9218852 | 0.0823908  |
| N | -1.0623164 | 0.1706320  | -1.4542424 |
| C | 4.6024925  | 0.3377314  | -0.1469662 |
| C | 0.2017692  | 0.7043774  | 0.4004653  |
| C | -2.0432496 | 5.0954785  | -0.8546963 |
| C | -5.7468320 | -3.8489414 | 0.0846477  |
| C | -2.6828902 | -0.8909389 | -0.3459942 |
| C | -2.2656717 | 0.1172700  | 0.6043296  |
| C | -2.8927725 | 4.3484945  | -0.0396765 |
| C | -1.1746022 | 0.9167703  | -0.1453391 |
| C | -3.7284971 | -1.8999336 | -0.1933943 |
| C | -5.4645524 | -2.9714795 | 1.1330500  |
| C | 4.8987526  | -2.4541168 | -0.2236760 |
| H | 5.0131565  | -3.5356054 | -0.2482028 |
| H | 6.6830730  | 0.3985583  | -0.6630735 |
| H | 0.2102987  | -0.1557808 | -1.4295578 |
| H | -3.2933684 | 2.4274020  | 0.8469196  |

|   |            |            |            |
|---|------------|------------|------------|
| H | -3.7653283 | 4.8135022  | 0.4103208  |
| H | -2.2496558 | 6.1453097  | -1.0424037 |
| H | -0.2583994 | 5.0601676  | -2.0689742 |
| H | 0.2059147  | 2.6659088  | -1.6396395 |
| H | -4.2488561 | -1.3282508 | 1.8189072  |
| H | -6.0236367 | -3.0376685 | 2.0627520  |
| H | -6.5245135 | -4.6000413 | 0.1910922  |
| H | -5.2328047 | -4.4251554 | -1.9309909 |
| H | -3.4661812 | -2.7090368 | -2.1745476 |
| C | 0.2565212  | 1.8537459  | 2.6772232  |
| H | 0.4012192  | 2.9159167  | 2.4683039  |
| H | -0.8054416 | 1.6188927  | 2.7520218  |
| H | 0.7846527  | 1.5693880  | 3.5856120  |
| C | 2.4668300  | -2.8174977 | 0.3687930  |
| H | 2.7926608  | -3.8569720 | 0.4484516  |
| H | 1.9706733  | -2.5366515 | 1.3041623  |
| H | 1.7183067  | -2.7495106 | -0.4284505 |
| C | 4.4419545  | 1.8365895  | -0.1207360 |
| H | 4.3157293  | 2.2038932  | 0.9033498  |
| H | 5.3225673  | 2.3181699  | -0.5516121 |
| H | 3.5611710  | 2.1506955  | -0.6919188 |
| C | 7.3429550  | -2.2445846 | -0.8273735 |
| H | 8.1087516  | -1.4729582 | -0.9421339 |
| H | 7.6649608  | -2.9381511 | -0.0425902 |
| H | 7.2879858  | -2.8148198 | -1.7621298 |

**TS8** : ring-closing via ketene-like

58

Energy = -1393.647204638

|   |            |            |            |
|---|------------|------------|------------|
| N | 2.4642302  | -1.7102647 | 0.6894767  |
| N | 1.1250773  | -1.6753621 | 0.5993315  |
| N | 2.8466373  | -0.5723697 | 0.1208325  |
| C | 0.6425539  | -0.5332663 | -0.0309929 |
| C | 0.3695130  | -2.7504639 | 1.2428756  |
| C | 4.2519377  | -0.2513473 | 0.0279225  |
| C | 1.8116069  | 0.1745044  | -0.3290861 |
| C | -0.7376074 | -0.2634985 | -0.2790959 |
| H | 1.0648125  | -3.2820070 | 1.8926016  |
| H | -0.0581275 | -3.4161377 | 0.4951441  |
| H | -0.4349454 | -2.2960799 | 1.8244813  |
| C | 4.7541914  | 0.7557139  | 0.8612523  |
| C | 5.0338344  | -0.9459331 | -0.9033765 |
| H | 1.9663653  | 1.1060488  | -0.8454603 |
| C | -1.1283022 | 1.0897564  | -0.7049965 |
| C | 6.1122696  | 1.0620117  | 0.7402960  |
| C | 3.8782284  | 1.4844004  | 1.8491656  |
| C | 6.3846716  | -0.5973964 | -0.9826551 |
| C | 4.4501041  | -2.0157564 | -1.7902611 |
| C | -2.1667495 | 1.2948560  | -1.6383232 |
| C | -0.4563463 | 2.2330749  | -0.2214251 |
| C | 6.9408216  | 0.3973757  | -0.1704517 |
| H | 6.5301208  | 1.8379026  | 1.3776216  |
| H | 3.2350531  | 0.7924366  | 2.4024151  |
| H | 4.4937874  | 2.0324309  | 2.5658067  |
| H | 3.2272239  | 2.2085651  | 1.3449946  |

|   |            |            |            |
|---|------------|------------|------------|
| H | 7.0142035  | -1.1138492 | -1.7035708 |
| H | 5.1680153  | -2.2979610 | -2.5633743 |
| H | 4.1960856  | -2.9106117 | -1.2122872 |
| H | 3.5319675  | -1.6715061 | -2.2790917 |
| C | -2.4974652 | 2.5753836  | -2.0759335 |
| H | -2.7066937 | 0.4399677  | -2.0312785 |
| C | -0.7816274 | 3.5089006  | -0.6678927 |
| H | 0.3043536  | 2.1196514  | 0.5459187  |
| C | 8.4096622  | 0.7289438  | -0.2569924 |
| C | -1.8079041 | 3.6924540  | -1.6003557 |
| H | -3.3012314 | 2.6988750  | -2.7972272 |
| H | -0.2450366 | 4.3674506  | -0.2720917 |
| H | 8.7991685  | 0.5391202  | -1.2613881 |
| H | 8.9832631  | 0.1089523  | 0.4435775  |
| H | 8.5945540  | 1.7757863  | 0.0007904  |
| H | -2.0715513 | 4.6897042  | -1.9406293 |
| N | -1.4914104 | -1.3996596 | -0.4875512 |
| N | -2.7603081 | -1.4786363 | -0.3359449 |
| C | -3.5379941 | -0.4805595 | 0.3236677  |
| C | -5.0050756 | -0.6676336 | 0.2717264  |
| C | -3.0545678 | 0.4704359  | 1.1340641  |
| C | -5.8868142 | 0.2274821  | 0.9041045  |
| C | -5.5483752 | -1.7443640 | -0.4502996 |
| O | -2.7654497 | 1.3651912  | 1.8407446  |
| C | -7.2650100 | 0.0458352  | 0.8267232  |
| H | -5.4936200 | 1.0769198  | 1.4581204  |
| C | -6.9301940 | -1.9168785 | -0.5286179 |
| H | -4.8748102 | -2.4347348 | -0.9449719 |
| C | -7.7985647 | -1.0289404 | 0.1094592  |
| H | -7.9251874 | 0.7506168  | 1.3253598  |
| H | -7.3293068 | -2.7551079 | -1.0943831 |
| H | -8.8740521 | -1.1683082 | 0.0463767  |

**TS9** : C=N cleavage

58

Energy = -1393.631619572

|   |            |            |            |
|---|------------|------------|------------|
| N | 1.1767076  | -0.7554393 | 1.1536234  |
| N | 0.0829881  | -0.0089719 | 1.1036423  |
| N | 2.0049925  | -0.1755405 | 0.2879018  |
| C | 0.1664353  | 1.0143675  | 0.1853260  |
| C | -1.0493419 | -0.3156562 | 1.9843145  |
| C | 3.3381084  | -0.7070517 | 0.1034964  |
| C | 1.4495946  | 0.9014480  | -0.3234711 |
| C | -0.9131443 | 1.9351014  | -0.1053823 |
| H | -0.6912477 | -1.0068512 | 2.7447241  |
| H | -1.3809748 | 0.6217073  | 2.4346843  |
| H | -1.8479516 | -0.7676672 | 1.3850008  |
| C | 3.6483946  | -1.3336049 | -1.1098619 |
| C | 4.2546922  | -0.5495177 | 1.1536471  |
| H | 1.9778181  | 1.4798903  | -1.0624661 |
| C | -0.7298285 | 3.3829960  | -0.2436136 |
| C | 4.9511044  | -1.8244023 | -1.2490417 |
| C | 2.6469629  | -1.4759734 | -2.2270196 |
| C | 5.5399143  | -1.0550536 | 0.9541977  |
| C | 3.8826695  | 0.1423338  | 2.4402587  |

|   |            |            |            |
|---|------------|------------|------------|
| C | -1.7328171 | 4.1863647  | -0.8203171 |
| C | 0.4486956  | 4.0074003  | 0.2052758  |
| C | 5.9049063  | -1.6979732 | -0.2353740 |
| H | 5.2202813  | -2.3219338 | -2.1777941 |
| H | 1.6377082  | -1.6694824 | -1.8556812 |
| H | 2.9424653  | -2.2901875 | -2.8930252 |
| H | 2.6027030  | -0.5587586 | -2.8279176 |
| H | 6.2745221  | -0.9374400 | 1.7474085  |
| H | 4.7759216  | 0.3272003  | 3.0405098  |
| H | 3.1916305  | -0.4677750 | 3.0314627  |
| H | 3.3906039  | 1.1031670  | 2.2509214  |
| C | -1.5587310 | 5.5616101  | -0.9408122 |
| H | -2.6509957 | 3.7286981  | -1.1775978 |
| C | 0.6198955  | 5.3838752  | 0.0720976  |
| H | 1.2299116  | 3.4174936  | 0.6762789  |
| C | 7.2934456  | -2.2599358 | -0.4079933 |
| C | -0.3802061 | 6.1716199  | -0.5007848 |
| H | -2.3468268 | 6.1600657  | -1.3893803 |

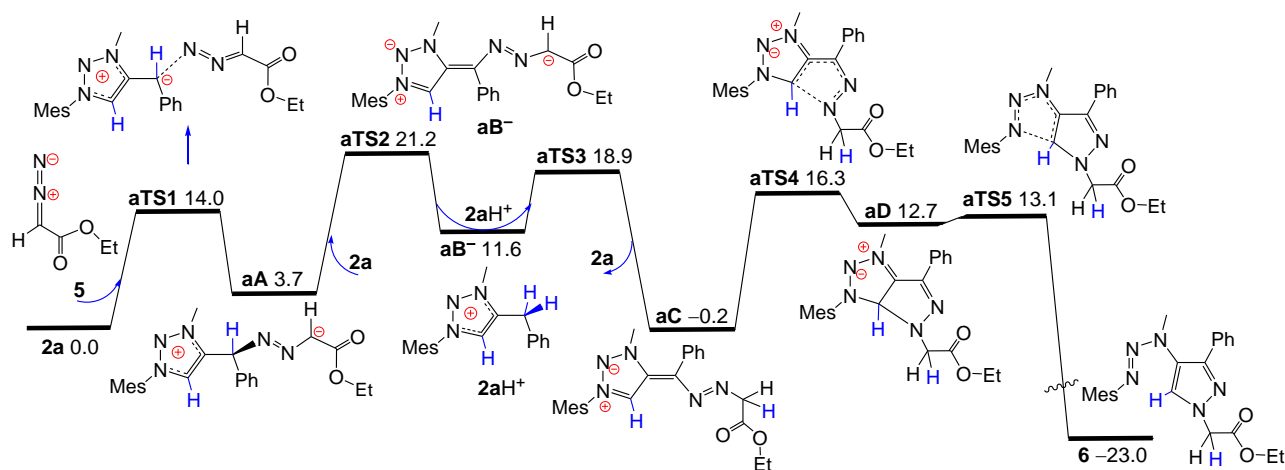

**Figure S63.** DFT computed free energy profile (in kcal/mol, at 298 K and 1 M in THF solution) for the formation of **6** from **5** and **2a** at the PW6B95-D3/def2-QZVP + COSMO-RS level using TPSS-D3/def2-TZVP + COSMO optimized geometries in THF solution.

**Table S6.** DFT computed energies for the reaction of diazo **5** and mNHO **2a** for the formation of **6** in THF solution.

TPSS-D3/def2-TZVP + COSMO computed imaginary frequency (ImF), zero-point energies (ZPE), enthalpic (Hc) and Gibbs free-energy (Gc) corrections; the COSMO-RS computed solvation enthalpic (Hsol) and Gibbs free-energy (Gsol) corrections in THF; TPSS-D3/def2-QZVP and PW6B95-D3/def2-QZVP single-point energies (TPSS-D3 and PW6B95 ( $E_P$ )); total PW6B95-D3 Gibbs free energies ( $G_P = E_P + G_c + G_{sol}$ ), relative electronic energies ( $\Delta E_T$  and  $\Delta E_P$ ) and final Gibbs free-energies ( $\Delta G_T$  and  $\Delta G_P$ ) at the TPSS-D3 and PW6B95-D3 levels. Each structure is labeled either by its molecular formula or a specific name, with singly charged cation and anion species indicated by the + and - superscripts, respectively. Transition structures (with only one imaginary frequency) are indicated by the "TS" prefix. See **Figure S63** for structural labelings. **The final PW6B95-D3 Gibbs free energies are used in our discussion.**

| Reactions        | ImF  | ZPE  | Hc   | Gc   | Hsol | Gsol | TPSS-D3 | PW6B95 | GP | $\Delta E_T$ | $\Delta E_P$ | <i>AGP</i>  | $\Delta G_T$ |
|------------------|------|------|------|------|------|------|---------|--------|----|--------------|--------------|-------------|--------------|
|                  |      | kcal | kcal | kcal | kcal | kcal |         |        |    | kcal         | kcal         | <i>kcal</i> | kcal         |
| (1 mol/L in THF) | cm-1 | /mol | /mol | /mol | /mol | /mol | Eh      | Eh     | Eh | /mol         | /mol         | <i>/mol</i> | /mol         |

**Nucleophilic addition of mNHO (2a) to terminal N of diazo (5) is 3.7 kcal/mol endergonic to form meta-stable trans-adduct aA**

|                                                                                               |       |        |        |        |         |         |             |             |             |        |        |        |        |
|-----------------------------------------------------------------------------------------------|-------|--------|--------|--------|---------|---------|-------------|-------------|-------------|--------|--------|--------|--------|
| <b>5 + 2a</b>                                                                                 | 0     | 287.61 | 306.59 | 238.50 | -38.79  | -26.64  | -1317.68314 | -1319.06543 | -1318.72179 | 0.00   | 0.00   | 0.00   | 0.00   |
| <b>aTS1</b>                                                                                   | 219i  | 286.72 | 306.47 | 251.16 | -34.92  | -26.18  | -1317.68636 | -1319.06110 | -1318.69955 | -2.02  | 2.72   | 13.96  | 9.22   |
| <b>aA</b>                                                                                     | 0     | 289.71 | 308.62 | 255.45 | -40.30  | -30.30  | -1317.69544 | -1319.07776 | -1318.71595 | -7.72  | -7.74  | 3.67   | 3.68   |
| <i>..followed by mNHO 2a catalyzed proton transfer (formal 1,4-H-shift)</i>                   |       |        |        |        |         |         |             |             |             |        |        |        |        |
| <b>5 + 2a + 2a</b>                                                                            | 0     | 510.53 | 542.66 | 433.04 | -66.63  | -46.79  | -2219.14666 | -2221.49350 | -2220.86895 | 0.00   | 0.00   | 0.00   | 0.00   |
| <b>aTS2</b>                                                                                   | 1626i | 506.83 | 540.68 | 457.76 | -47.71  | -36.60  | -2219.16962 | -2221.50941 | -2220.83524 | -14.41 | -9.99  | 21.15  | 16.73  |
| <b>aB<sup>-</sup> + 2aH<sup>+</sup></b>                                                       | 0     | 512.41 | 544.52 | 449.57 | -135.35 | -113.36 | -2219.04738 | -2221.39233 | -2220.85052 | 62.30  | 63.48  | 11.56  | 10.38  |
| <b>aTS3</b>                                                                                   | 1548i | 506.04 | 540.28 | 455.18 | -51.25  | -38.68  | -2219.16700 | -2221.50562 | -2220.83887 | -12.76 | -7.60  | 18.87  | 13.71  |
| <b>aC + 2a</b>                                                                                | 0     | 512.69 | 544.68 | 450.11 | -60.46  | -44.62  | -2219.17297 | -2221.52147 | -2220.86925 | -16.51 | -17.55 | -0.19  | 0.85   |
| <i>..and kinetically even more facile nucleophilic addition and 5-ring opening to reach 6</i> |       |        |        |        |         |         |             |             |             |        |        |        |        |
| <b>5 + 2a</b>                                                                                 | 0     | 287.61 | 306.59 | 238.50 | -38.79  | -26.64  | -1317.68314 | -1319.06543 | -1318.72179 | 0.00   | 0.00   | 0.00   | 0.00   |
| <b>aC</b>                                                                                     | 0     | 289.76 | 308.61 | 255.58 | -32.62  | -24.47  | -1317.70945 | -1319.09340 | -1318.72209 | -16.51 | -17.55 | -0.19  | 0.85   |
| <b>aTS4</b>                                                                                   | 166i  | 288.00 | 307.15 | 253.17 | -30.27  | -22.64  | -1317.68643 | -1319.06614 | -1318.69576 | -2.06  | -0.44  | 16.34  | 14.71  |
| <b>aD</b>                                                                                     | 0     | 290.68 | 309.10 | 256.92 | -31.23  | -23.26  | -1317.69338 | -1319.07695 | -1318.70158 | -6.43  | -7.23  | 12.69  | 13.48  |
| <b>aTS5</b>                                                                                   | 225i  | 288.08 | 307.30 | 252.91 | -30.03  | -22.46  | -1317.68996 | -1319.07119 | -1318.70093 | -4.28  | -3.61  | 13.09  | 12.43  |
| <b>6</b>                                                                                      | 0     | 290.01 | 308.93 | 255.46 | -34.34  | -24.41  | -1317.74015 | -1319.12972 | -1318.75850 | -35.77 | -40.34 | -23.03 | -18.47 |

**Table S7.** TPSS-D3/def2-TZVP + COSMO optimized Cartesian coordinates (in Å) in THF. Each structure is labeled by the specific name (See also **Table S6** and Figure S63), followed by the number of atoms, the total energy, and the detailed atomic coordinates (in double-column text list). Abbreviations for substituents: Mes = mesityl C<sub>6</sub>H<sub>2</sub>Me<sub>3</sub>, E = CO<sub>2</sub>Et and Ph = C<sub>6</sub>H<sub>5</sub>.

**5** : diazo N=N=CHE

14

Energy = -416.2040736493

|   |            |            |            |
|---|------------|------------|------------|
| C | -1.7250106 | 0.6071144  | 0.0003414  |
| N | -2.0978127 | -0.6489439 | -0.0010531 |
| H | -2.5073161 | 1.3526924  | 0.0007524  |
| N | -2.4004995 | -1.7422386 | -0.0022176 |
| C | -0.3152255 | 0.9484167  | 0.0006747  |
| O | 0.0985143  | 2.1019822  | 0.0013431  |
| O | 0.4793308  | -0.1496993 | 0.0001237  |
| C | 1.9193638  | 0.1118693  | 0.0004303  |
| H | 2.1580724  | 0.7019888  | 0.8894912  |
| H | 2.1583153  | 0.7026143  | -0.8881500 |
| C | 2.6128801  | -1.2342668 | 0.0000500  |
| H | 2.3456768  | -1.8114370 | -0.8902545 |
| H | 3.6968298  | -1.0800282 | 0.0003831  |
| H | 2.3452620  | -1.8121294 | 0.8897883  |

**6** : final product of diazo **5** and mNHO **2a**

57

Energy = -1317.678632770

|   |            |            |            |
|---|------------|------------|------------|
| N | 0.0018257  | -0.8246669 | -2.0379734 |
| N | 1.1863700  | -0.2310070 | -1.7750008 |
| N | -0.8895173 | -0.6297575 | -1.1542117 |
| C | 1.4130506  | 0.6011381  | -0.6551759 |
| C | 2.1232886  | -0.2140131 | -2.8969384 |
| C | -2.0981234 | -1.3322168 | -1.3300733 |
| C | 0.6133478  | 1.6370818  | -0.1995836 |
| C | 2.5412551  | 0.5802054  | 0.2161529  |
| H | 1.8503604  | -1.0295239 | -3.5674887 |
| H | 3.1401567  | -0.3644772 | -2.5277162 |
| H | 2.0708351  | 0.7413267  | -3.4331848 |
| C | -2.2502295 | -2.5783527 | -1.9878085 |
| C | -3.2087863 | -0.7316568 | -0.6862828 |
| H | -0.3441787 | 2.0020022  | -0.5328364 |
| C | 3.6974276  | -0.3233103 | 0.2251625  |
| H | 0.2847669  | 4.0000587  | 1.1688195  |
| C | -3.5220966 | -3.1627663 | -2.0076926 |
| C | -1.1074062 | -3.3343159 | -2.6220679 |
| C | -4.4545823 | -1.3528361 | -0.7463731 |
| C | -3.0438451 | 0.5751520  | 0.0498146  |
| C | 4.9412276  | 0.1198681  | 0.7056110  |
| C | 3.5787520  | -1.6503110 | -0.2204357 |
| C | -4.6386089 | -2.5710143 | -1.4111972 |
| H | -3.6358290 | -4.1277808 | -2.4996670 |
| H | -0.8042923 | -2.8911999 | -3.5755787 |
| H | -0.2187469 | -3.3274193 | -1.9822124 |
| H | -1.4082548 | -4.3716990 | -2.8000784 |

|   |            |            |            |
|---|------------|------------|------------|
| H | -5.3010051 | -0.8780538 | -0.2526083 |
| H | -3.9641536 | 0.8279705  | 0.5852400  |
| H | -2.2126839 | 0.5249146  | 0.7604677  |
| H | -2.8179442 | 1.3941868  | -0.6442040 |
| C | 6.0363892  | -0.7403939 | 0.7339010  |
| H | 5.0372450  | 1.1450687  | 1.0496576  |
| C | 4.6777788  | -2.5074643 | -0.1951593 |
| H | 2.6166752  | -2.0120803 | -0.5704859 |
| C | -5.9985352 | -3.2208297 | -1.4840312 |
| C | 5.9109253  | -2.0564276 | 0.2800514  |
| H | 6.9927230  | -0.3819482 | 1.1047379  |
| H | 4.5688039  | -3.5321176 | -0.5396067 |
| H | -5.9148470 | -4.2879654 | -1.7109230 |
| H | -6.6103425 | -2.7607660 | -2.2711288 |
| H | -6.5437812 | -3.1072007 | -0.5410227 |
| H | 6.7669705  | -2.7249008 | 0.2983328  |
| N | 2.4367022  | 1.5600158  | 1.1326383  |
| N | 1.2662669  | 2.1854965  | 0.8542696  |
| C | 0.7670734  | 3.2072809  | 1.7462940  |
| C | -0.2279128 | 2.6449083  | 2.7624521  |
| O | -0.4880902 | 1.4694368  | 2.9085558  |
| O | -0.7666446 | 3.6580015  | 3.4650822  |
| C | -1.7676398 | 3.2845332  | 4.4771548  |
| H | -1.4352185 | 2.3616171  | 4.9562673  |
| H | -1.7318595 | 4.1095658  | 5.1894922  |
| H | 1.6180722  | 3.6401945  | 2.2764306  |
| C | -3.1389009 | 3.1358076  | 3.8432759  |
| H | -3.4342944 | 4.0583839  | 3.3346277  |
| H | -3.1487662 | 2.3107950  | 3.1259305  |
| H | -3.8743634 | 2.9217048  | 4.6261980  |

**aA** : initial N..C adduct of **5** and **2a**

57

Energy = -1317.646931960

|   |            |            |            |
|---|------------|------------|------------|
| N | -0.7912538 | -1.9067930 | 0.5434481  |
| N | -1.9902258 | -1.3429697 | 0.6592813  |
| N | -0.0003859 | -0.8907777 | 0.2033025  |
| C | -1.9871743 | 0.0047081  | 0.4185739  |
| C | -3.1304557 | -2.1858597 | 1.0336819  |
| C | 1.4216745  | -1.0832471 | 0.0350925  |
| C | -0.6679906 | 0.2911456  | 0.1068704  |
| C | -3.1526889 | 0.9130483  | 0.6458556  |
| H | -2.7640688 | -3.2069252 | 1.1180971  |
| H | -3.8945342 | -2.1162211 | 0.2585591  |
| H | -3.5281124 | -1.8447624 | 1.9905058  |
| C | 2.2633400  | -0.6328540 | 1.0600934  |
| C | 1.8834623  | -1.6504102 | -1.1581903 |
| H | -0.1700931 | 1.2199457  | -0.1171115 |

|   |            |            |            |
|---|------------|------------|------------|
| C | -3.6560028 | 1.5232495  | -0.6549635 |
| H | -3.9697912 | 0.3295220  | 1.0800532  |
| C | 3.6381171  | -0.7787952 | 0.8569952  |
| C | 1.7168006  | -0.0064114 | 2.3172516  |
| C | 3.2671959  | -1.7693800 | -1.3074632 |
| C | 0.9347562  | -2.1007944 | -2.2390619 |
| C | -4.9587607 | 1.2589396  | -1.0898042 |
| C | -2.8432513 | 2.3752714  | -1.4146269 |
| C | 4.1562243  | -1.3426038 | -0.3139845 |
| H | 4.3180778  | -0.4360067 | 1.6331751  |
| H | 0.9726212  | -0.6545920 | 2.7929169  |
| H | 2.5238279  | 0.1716181  | 3.0309858  |
| H | 1.2289499  | 0.9510800  | 2.1025979  |
| H | 3.6572834  | -2.1970269 | -2.2280647 |
| H | 1.4882917  | -2.3703109 | -3.1408623 |
| H | 0.3554307  | -2.9731908 | -1.9173371 |
| H | 0.2200224  | -1.3110849 | -2.4968175 |
| C | -5.4452501 | 1.8300887  | -2.2678965 |
| H | -5.5986876 | 0.6065037  | -0.4996029 |
| C | -3.3278841 | 2.9461302  | -2.5899466 |
| H | -1.8421196 | 2.6105914  | -1.0642590 |
| C | 5.6443507  | -1.5050013 | -0.4955752 |
| C | -4.6292161 | 2.6733310  | -3.0228944 |
| H | -6.4603247 | 1.6176815  | -2.5923538 |
| H | -2.6911772 | 3.6089559  | -3.1697713 |
| H | 5.9260162  | -1.4126001 | -1.5486411 |
| H | 5.9655365  | -2.4969968 | -0.1537858 |
| H | 6.1967814  | -0.7601987 | 0.0841918  |
| H | -5.0040744 | 3.1196361  | -3.9396895 |
| N | -2.8003097 | 1.9595787  | 1.6681916  |
| N | -1.6222288 | 2.4246435  | 1.4068986  |
| C | -1.0804128 | 3.4034503  | 2.1187953  |
| C | 0.2405495  | 3.8481172  | 1.7938463  |
| O | 0.8576108  | 4.7533290  | 2.3723112  |
| O | 0.8214363  | 3.1632324  | 0.7339079  |
| C | 2.1532404  | 3.6026001  | 0.3708882  |
| H | 2.1293696  | 4.6749524  | 0.1530774  |
| H | 2.8269766  | 3.4450751  | 1.2203509  |
| H | -1.5943584 | 3.8906446  | 2.9499802  |
| C | 2.5768200  | 2.7917466  | -0.8403994 |
| H | 2.6129386  | 1.7228057  | -0.6081873 |
| H | 1.8839492  | 2.9478457  | -1.6737984 |
| H | 3.5761038  | 3.1048475  | -1.1609989 |

**aB<sup>-</sup>** : C-H deprotonated adduct **aA**

56

Energy = -1317.135528065

|   |            |            |            |
|---|------------|------------|------------|
| N | -2.7015300 | -0.6795320 | -1.6940931 |
| N | -1.6024211 | -0.1079133 | -1.1222477 |
| N | -3.6824428 | -0.3198938 | -0.8576103 |
| C | -1.8937007 | 0.6423111  | 0.0320089  |
| C | -0.2957714 | -0.5549237 | -1.5583348 |
| C | -5.0315071 | -0.7556764 | -1.1064593 |
| C | -3.2786442 | 0.4341201  | 0.1834492  |
| C | -0.9748865 | 1.3248960  | 0.8627261  |

|   |            |            |            |
|---|------------|------------|------------|
| H | 0.1879599  | 0.1766074  | -2.2141829 |
| H | -0.4221584 | -1.5053043 | -2.0783182 |
| H | 0.3278306  | -0.6785003 | -0.6674134 |
| C | -5.7648073 | -0.1361883 | -2.1235218 |
| C | -5.5581868 | -1.7615332 | -0.2831726 |
| H | -3.9576281 | 0.7625344  | 0.9487117  |
| C | 0.2379399  | 1.9422943  | 0.3658312  |
| N | -1.2488109 | 1.5275908  | 2.2253042  |
| C | -7.0854742 | -0.5601246 | -2.3103480 |
| C | -5.1659714 | 0.9513733  | -2.9785321 |
| C | -6.8820320 | -2.1443328 | -0.5097468 |
| C | -4.7288530 | -2.4050032 | 0.7989029  |
| C | 0.3913728  | 2.3638522  | -0.9817650 |
| C | 1.3079314  | 2.2517961  | 1.2490319  |
| N | -2.3258270 | 0.9440422  | 2.6635309  |
| C | -7.6592928 | -1.5568757 | -1.5160364 |
| H | -7.6806351 | -0.0881837 | -3.0891525 |
| H | -4.4402608 | 0.5381837  | -3.6871298 |
| H | -5.9482536 | 1.4642588  | -3.5435079 |
| H | -4.6359557 | 1.6889115  | -2.3663888 |
| H | -7.3139689 | -2.9222586 | 0.1164170  |
| H | -5.2748231 | -3.2402689 | 1.2444295  |
| H | -3.7846134 | -2.7843901 | 0.3923578  |
| H | -4.4770219 | -1.6905996 | 1.5902012  |
| C | 1.5460602  | 3.0018643  | -1.4231105 |
| H | -0.4334448 | 2.2261493  | -1.6770347 |
| C | 2.4556144  | 2.8968046  | 0.8029843  |
| H | 1.2027549  | 1.9719124  | 2.2924128  |
| C | -2.6645829 | 1.1539043  | 3.9542141  |
| C | -9.0858027 | -1.9973719 | -1.7378535 |
| C | 2.6004213  | 3.2713123  | -0.5407832 |
| H | 1.6158282  | 3.3129628  | -2.4637327 |
| H | 3.2560277  | 3.1064975  | 1.5104425  |
| C | -3.8422609 | 0.6089434  | 4.5104194  |
| H | -2.0477620 | 1.7840716  | 4.6008411  |
| H | -9.6574307 | -1.9638201 | -0.8037224 |
| H | -9.1223651 | -3.0304754 | -2.1040757 |
| H | -9.5853400 | -1.3589689 | -2.4717709 |
| H | 3.5014310  | 3.7708030  | -0.8864065 |
| O | -4.2285436 | 0.7441967  | 5.6955061  |
| O | -4.6268407 | -0.1217143 | 3.6021070  |
| C | -5.7960747 | -0.7483191 | 4.1634636  |
| H | -6.2595181 | -0.0723189 | 4.8882553  |
| H | -6.4708776 | -0.8837533 | 3.3116553  |
| C | -5.4655127 | -2.0868703 | 4.8137096  |
| H | -4.9802969 | -2.7565641 | 4.0958496  |
| H | -4.7959437 | -1.9363561 | 5.6650502  |
| H | -6.3835406 | -2.5693090 | 5.1715704  |

**aC** : C-protonated **aB<sup>-</sup>**, formal 1,4-H-shift

57

Energy = -1317.650730855

|   |            |            |            |
|---|------------|------------|------------|
| N | -0.0708790 | -2.3442058 | -0.9201433 |
| N | 1.1835289  | -1.8587637 | -0.9051211 |
| N | -0.7959425 | -1.3215185 | -0.4613255 |

|   |            |            |            |
|---|------------|------------|------------|
| C | 1.2735996  | -0.5632734 | -0.4200152 |
| C | 2.2481248  | -2.6713255 | -1.4836435 |
| C | -2.2283526 | -1.4312998 | -0.3325972 |
| C | -0.0594203 | -0.2291601 | -0.1650712 |
| C | 2.4496743  | 0.2417235  | -0.2697968 |
| H | 1.7869903  | -3.3772423 | -2.1730457 |
| H | 2.7974559  | -3.2002133 | -0.7017080 |
| H | 2.9298523  | -2.0020395 | -2.0105366 |
| C | -3.0234557 | -0.6705797 | -1.1999350 |
| C | -2.7508724 | -2.2367529 | 0.6868312  |
| H | -0.4922188 | 0.6858434  | 0.1996088  |
| C | 3.7377917  | -0.2947145 | 0.1570431  |
| H | 1.0635714  | 3.9523345  | -1.7276288 |
| C | -4.4076931 | -0.7446801 | -1.0220951 |
| C | -2.4227120 | 0.1956543  | -2.2787157 |
| C | -4.1413989 | -2.2735688 | 0.8179020  |
| C | -1.8597062 | -3.0178415 | 1.6184479  |
| C | 4.9384661  | 0.3800145  | -0.1570235 |
| C | 3.8371577  | -1.4643669 | 0.9419392  |
| C | -4.9831731 | -1.5387774 | -0.0244780 |
| H | -5.0492225 | -0.1646856 | -1.6814809 |
| H | -1.6896568 | -0.3605305 | -2.8725089 |
| H | -3.2060994 | 0.5594607  | -2.9471717 |
| H | -1.9017195 | 1.0631913  | -1.8569249 |
| H | -4.5739445 | -2.8826223 | 1.6084094  |
| H | -2.4359652 | -3.3897682 | 2.4685894  |
| H | -1.4077730 | -3.8739928 | 1.1066058  |
| H | -1.0408022 | -2.3978427 | 1.9998970  |
| C | 6.1685954  | -0.0966740 | 0.2854032  |
| H | 4.8825293  | 1.2850706  | -0.7541018 |
| C | 5.0720601  | -1.9482816 | 1.3688416  |
| H | 2.9300960  | -1.9773607 | 1.2539861  |
| C | -6.4816158 | -1.6170825 | 0.1284952  |
| C | 6.2500915  | -1.2707107 | 1.0435455  |
| H | 7.0757039  | 0.4440200  | 0.0258090  |
| H | 5.1120724  | -2.8492770 | 1.9761329  |
| H | -6.7645173 | -1.7649312 | 1.1750059  |
| H | -6.8820667 | -2.4634027 | -0.4438194 |
| H | -6.9649899 | -0.7086048 | -0.2420741 |
| H | 7.2129256  | -1.6465641 | 1.3777734  |
| N | 2.3412119  | 1.5998509  | -0.3740255 |
| N | 1.2174199  | 2.0746084  | -0.7931029 |
| C | 1.1734522  | 3.5214266  | -0.7203403 |
| C | -0.0227279 | 4.0415387  | 0.0692053  |
| O | -0.2447456 | 5.2280779  | 0.2489472  |
| O | -0.8210057 | 3.0598851  | 0.5373889  |
| C | -1.9984243 | 3.4989554  | 1.2894831  |
| H | -1.6550472 | 4.0644275  | 2.1599170  |
| H | -2.5832372 | 4.1647589  | 0.6490901  |
| H | 2.0813133  | 3.9496211  | -0.2708387 |
| C | -2.7660719 | 2.2519665  | 1.6796149  |
| H | -3.0958977 | 1.6964254  | 0.7963661  |
| H | -2.1529114 | 1.5933156  | 2.3026271  |
| H | -3.6526083 | 2.5387268  | 2.2542330  |

**aD** : C..N nucleophilic addition within **aC**  
57

Energy = -1317.630501651

|   |            |            |            |
|---|------------|------------|------------|
| N | 0.0080296  | -2.6418450 | -0.6395303 |
| N | 1.2335926  | -2.3612323 | -0.2987378 |
| N | -0.7673740 | -1.6870578 | -0.0434811 |
| C | 1.4222332  | -1.2349416 | 0.5017894  |
| C | 2.2920940  | -3.2398142 | -0.7903212 |
| C | -2.0726361 | -1.4431437 | -0.5773394 |
| C | 0.0527936  | -0.6053305 | 0.5727338  |
| C | 2.3002564  | -0.1464363 | 0.0333948  |
| H | 1.8367659  | -3.9586866 | -1.4694052 |
| H | 2.7655283  | -3.7497290 | 0.0510717  |
| H | 3.0351330  | -2.6356997 | -1.3149922 |
| C | -2.2702628 | -1.2370806 | -1.9566299 |
| C | -3.1378631 | -1.3606026 | 0.3361396  |
| H | -0.3668240 | -0.3687633 | 1.5574359  |
| C | 3.7567460  | -0.1781712 | -0.0747493 |
| H | -1.6374378 | 1.5057834  | -0.2570334 |
| C | -3.5699779 | -0.9796421 | -2.4002650 |
| C | -1.1240885 | -1.2355359 | -2.9373993 |
| C | -4.4168165 | -1.0851862 | -0.1565527 |
| C | -2.9124151 | -1.5521219 | 1.8138108  |
| C | 4.4427425  | 0.7146363  | -0.9190217 |
| C | 4.5008943  | -1.1024726 | 0.6785791  |
| C | -4.6561070 | -0.9020028 | -1.5208480 |
| H | -3.7321473 | -0.8094429 | -3.4631549 |
| H | -0.2746631 | -0.6735338 | -2.5348128 |
| H | -0.7758779 | -2.2503925 | -3.1545802 |
| H | -1.4378568 | -0.7707347 | -3.8761564 |
| H | -5.2457890 | -1.0213373 | 0.5455114  |
| H | -3.8555798 | -1.7696456 | 2.3216400  |
| H | -2.2067062 | -2.3666189 | 2.0025064  |
| H | -2.4911252 | -0.6476812 | 2.2730301  |
| C | 5.8313350  | 0.6826019  | -1.0004679 |
| H | 3.8684526  | 1.4233583  | -1.5076672 |
| C | 5.8914953  | -1.1350731 | 0.5905864  |
| H | 3.9745882  | -1.7809501 | 1.3447819  |
| C | -6.0494273 | -0.6392353 | -2.0372850 |
| C | 6.5634502  | -0.2436573 | -0.2487943 |
| H | 6.3480628  | 1.3764728  | -1.6581617 |
| H | 6.4521943  | -1.8534373 | 1.1824837  |
| H | -6.7053659 | -0.2790977 | -1.2394333 |
| H | -6.4920637 | -1.5570089 | -2.4449064 |
| H | -6.0390225 | 0.1026665  | -2.8424893 |
| H | 7.6471997  | -0.2698667 | -0.3194152 |
| N | 1.6113589  | 0.9111375  | -0.3192776 |
| N | 0.2474455  | 0.6386489  | -0.1986563 |
| C | -0.6101528 | 1.7778237  | 0.0064123  |
| C | -0.6061760 | 2.3235856  | 1.4368753  |
| O | 0.1449980  | 1.9666378  | 2.3239762  |
| O | -1.5697898 | 3.2577872  | 1.5740573  |
| C | -1.7214617 | 3.8488331  | 2.9100533  |
| H | -0.7270954 | 3.9682879  | 3.3448180  |
| H | -2.1627171 | 4.8268447  | 2.7131496  |



|   |            |           |            |
|---|------------|-----------|------------|
| H | -0.3035110 | 2.5812013 | -0.6699153 |
| C | -2.6199037 | 2.9830673 | 3.7755751  |
| H | -3.5951431 | 2.8400869 | 3.3003911  |
| H | -2.1623886 | 2.0064781 | 3.9569128  |
| H | -2.7748133 | 3.4755127 | 4.7416350  |

**aTS1** : electrophilic **5** N-to-C **2a** addition  
57

Energy = -1317.632547302

|   |            |            |            |
|---|------------|------------|------------|
| N | 0.9183715  | -2.4266125 | 1.1301166  |
| N | -0.3986463 | -2.5994006 | 1.2067890  |
| N | 1.0529683  | -1.3710274 | 0.3389829  |
| C | -1.1245882 | -1.6743941 | 0.4756375  |
| C | -0.9284431 | -3.6780843 | 2.0378198  |
| C | 2.3562626  | -0.8288337 | 0.0299397  |
| C | -0.1362003 | -0.8645858 | -0.0855546 |
| C | -2.5328464 | -1.5054887 | 0.5839376  |
| H | -0.0837000 | -4.2692514 | 2.3862230  |
| H | -1.6014301 | -4.2923565 | 1.4371246  |
| H | -1.4683185 | -3.2499216 | 2.8848719  |
| C | 2.8932340  | 0.1271094  | 0.8998992  |
| C | 2.9720166  | -1.2272941 | -1.1623927 |
| H | -0.1718063 | 0.0144455  | -0.7004673 |
| C | -3.3547288 | -0.9172099 | -0.4760568 |
| H | -3.0378440 | -2.2740823 | 1.1621335  |
| C | 4.1104737  | 0.7049417  | 0.5288786  |
| C | 2.1933054  | 0.5178382  | 2.1745610  |
| C | 4.1902089  | -0.6223883 | -1.4798826 |
| C | 2.3392225  | -2.2459533 | -2.0752883 |
| C | -4.6697735 | -1.3942357 | -0.6496733 |
| C | -2.9319216 | 0.1550080  | -1.2875507 |
| C | 4.7695911  | 0.3459044  | -0.6516533 |
| H | 4.5459298  | 1.4621812  | 1.1764277  |
| H | 2.3036277  | -0.2662247 | 2.9328479  |
| H | 2.6199884  | 1.4401544  | 2.5742524  |
| H | 1.1225415  | 0.6758690  | 2.0137239  |
| H | 4.6891384  | -0.9065685 | -2.4032971 |
| H | 3.0231013  | -2.5044449 | -2.8862869 |
| H | 2.0828551  | -3.1620606 | -1.5329602 |
| H | 1.4142498  | -1.8597621 | -2.5199544 |
| C | -5.5180722 | -0.8449359 | -1.6064330 |
| H | -5.0197924 | -2.2114857 | -0.0232597 |
| C | -3.7866254 | 0.7066013  | -2.2409579 |
| H | -1.9557158 | 0.6015624  | -1.1460025 |
| C | 6.0895853  | 0.9768108  | -1.0176424 |
| C | -5.0787236 | 0.2078843  | -2.4150203 |
| H | -6.5240816 | -1.2389016 | -1.7227431 |
| H | -3.4398626 | 1.5379031  | -2.8491221 |
| H | 6.2184814  | 1.0195771  | -2.1030119 |
| H | 6.9220501  | 0.3907179  | -0.6082511 |
| H | 6.1687602  | 1.9898077  | -0.6129031 |
| H | -5.7366739 | 0.6369942  | -3.1650907 |
| N | -2.4742766 | -0.0167390 | 1.9226981  |
| N | -1.7216734 | 0.8228417  | 1.4782186  |
| C | -1.3539876 | 2.0412005  | 1.8889478  |

|   |            |           |            |
|---|------------|-----------|------------|
| C | -0.4486159 | 2.8422846 | 1.1296653  |
| O | -0.0741706 | 3.9744983 | 1.4627194  |
| O | 0.0070865  | 2.2611644 | -0.0392691 |
| C | 0.9390419  | 3.0743922 | -0.7991075 |
| H | 0.4530787  | 4.0192613 | -1.0608289 |
| H | 1.8059856  | 3.2997777 | -0.1703359 |
| H | -1.7522245 | 2.4587434 | 2.8117251  |
| C | 1.3301929  | 2.2807701 | -2.0310037 |
| H | 1.8527650  | 1.3596874 | -1.7565139 |
| H | 0.4485272  | 2.0265221 | -2.6290811 |
| H | 2.0038540  | 2.8796461 | -2.6526619 |

**aTS2** : deprotonation of **aA** with base **2a**  
100

Energy = -2219.063933615

|   |            |            |            |
|---|------------|------------|------------|
| N | -2.0126169 | 1.6179888  | -3.5542745 |
| N | -2.3803081 | 1.8608615  | -2.2869884 |
| N | -1.0409666 | 0.7137491  | -3.4228388 |
| C | -1.6889817 | 1.1041459  | -1.3540380 |
| C | -3.3823385 | 2.9000607  | -2.0622796 |
| C | -0.3171790 | 0.2294253  | -4.5732083 |
| C | -0.7975163 | 0.3703126  | -2.1378768 |
| C | -1.7690176 | 1.1364847  | 0.0957648  |
| H | -4.3548470 | 2.4510490  | -1.8498937 |
| H | -3.4279295 | 3.5056765  | -2.9661711 |
| H | -3.0700649 | 3.5000882  | -1.2077762 |
| C | -0.8802542 | -0.7897641 | -5.3458175 |
| C | 0.9525486  | 0.7725245  | -4.8101648 |
| H | -0.0465406 | -0.3496426 | -1.8664196 |
| C | -2.9783932 | 1.6402199  | 0.7710393  |
| N | -0.5302250 | 1.4073811  | 0.8043236  |
| C | -0.1124528 | -1.2773050 | -6.4083127 |
| C | -2.2481365 | -1.3434511 | -5.0433236 |
| C | 1.6763568  | 0.2482851  | -5.8825458 |
| C | 1.5089183  | 1.8678464  | -3.9374916 |
| C | -4.2513313 | 1.1515501  | 0.4041444  |
| C | -2.9028937 | 2.4830911  | 1.8977480  |
| N | 0.5122729  | 0.9585547  | 0.1783824  |
| C | 1.1620685  | -0.7752403 | -6.6886082 |
| H | -0.5192372 | -2.0773930 | -7.0224880 |
| H | -3.0291007 | -0.6127077 | -5.2818252 |
| H | -2.4310937 | -2.2456500 | -5.6314055 |
| H | -2.3441319 | -1.5967318 | -3.9825010 |
| H | 2.6659696  | 0.6492825  | -6.0901183 |
| H | 2.4288351  | 2.2658878  | -4.3719351 |
| H | 0.7930884  | 2.6906771  | -3.8343380 |
| H | 1.7312094  | 1.4955482  | -2.9305449 |
| C | -5.3999391 | 1.5295467  | 1.0959974  |
| H | -4.3309806 | 0.4500782  | -0.4245866 |
| C | -4.0520291 | 2.8465693  | 2.5976756  |
| H | -1.9268073 | 2.8358926  | 2.2113304  |
| C | 1.7021724  | 1.0207796  | 0.7924041  |
| C | 1.9671406  | -1.3145100 | -7.8451205 |
| C | -5.3107240 | 2.3838927  | 2.1998514  |
| H | -6.3659442 | 1.1390624  | 0.7855188  |

|   |            |            |            |
|---|------------|------------|------------|
| H | -3.9657885 | 3.5017686  | 3.4614251  |
| C | 2.8768857  | 0.4869692  | 0.1896433  |
| H | 1.8121157  | 1.4387930  | 1.7949896  |
| H | 2.9979679  | -1.5265067 | -7.5420586 |
| H | 2.0122142  | -0.5824692 | -8.6607526 |
| H | 1.5245754  | -2.2329998 | -8.2399591 |
| H | -6.2034316 | 2.6697512  | 2.7488389  |
| O | 3.9898235  | 0.4127794  | 0.7396918  |
| O | 2.6928506  | 0.0157719  | -1.1081819 |
| C | 3.8501682  | -0.6036949 | -1.7126787 |
| H | 4.3641643  | -1.2115499 | -0.9622110 |
| H | 3.4315903  | -1.2553861 | -2.4852918 |
| C | 4.8029809  | 0.4166496  | -2.3219266 |
| H | 4.2893424  | 1.0324146  | -3.0663125 |
| H | 5.2124803  | 1.0660419  | -1.5441786 |
| H | 5.6321025  | -0.1022752 | -2.8178318 |
| H | -1.8764615 | -0.2509240 | 0.3789067  |
| C | -1.7841734 | -1.5830157 | 0.8711417  |
| C | -1.1739754 | -1.3272245 | 2.1471398  |
| C | -1.1349778 | -2.3596943 | -0.1999136 |
| H | -2.8445371 | -1.8236599 | 0.9655610  |
| N | -1.9274934 | -0.9817299 | 3.2607945  |
| C | 0.1373405  | -1.1562531 | 2.5961678  |
| C | -1.9600005 | -3.0278281 | -1.1303918 |
| C | 0.2555681  | -2.4009161 | -0.4273898 |
| N | -1.1918754 | -0.5992970 | 4.3154075  |
| C | -3.3794640 | -0.9187542 | 3.3543769  |
| N | 0.0542342  | -0.7161913 | 3.8750141  |
| H | 1.0859879  | -1.1896130 | 2.0897978  |
| C | -1.4294320 | -3.6913003 | -2.2328800 |
| H | -3.0378420 | -3.0107764 | -0.9820602 |
| C | 0.7847348  | -3.0675425 | -1.5308004 |
| H | 0.9330369  | -1.8494319 | 0.2122581  |
| H | -3.6292146 | -0.6494153 | 4.3790512  |
| H | -3.8015424 | -1.8961713 | 3.1089467  |
| H | -3.7568641 | -0.1628292 | 2.6590931  |
| C | 1.1550037  | -0.2889764 | 4.7038121  |
| C | -0.0482097 | -3.7145429 | -2.4466173 |
| H | -2.0975058 | -4.1896312 | -2.9308006 |
| H | 1.8600448  | -3.0622380 | -1.6842273 |
| C | 1.3022668  | 1.0830614  | 4.9398891  |
| C | 2.0388470  | -1.2583820 | 5.1961354  |
| H | 0.3691444  | -4.2207859 | -3.3119373 |
| C | 2.4018072  | 1.4771366  | 5.7097437  |
| C | 0.3335014  | 2.0969821  | 4.3872607  |
| C | 3.1150105  | -0.8077496 | 5.9623382  |
| C | 1.8457127  | -2.7280018 | 4.9173339  |
| C | 3.3146313  | 0.5531687  | 6.2254819  |
| H | 2.5494509  | 2.5375806  | 5.9009152  |
| H | -0.5974869 | 2.1002444  | 4.9653046  |
| H | 0.7712647  | 3.0972636  | 4.4386670  |
| H | 0.0689380  | 1.8797094  | 3.3453596  |
| H | 3.8132679  | -1.5400632 | 6.3615835  |
| H | 2.4821465  | -3.3226930 | 5.5766197  |
| H | 0.8050441  | -3.0320005 | 5.0701832  |

|   |           |            |           |
|---|-----------|------------|-----------|
| H | 2.1099446 | -2.9760069 | 3.8828248 |
| C | 4.4967621 | 1.0079045  | 7.0450859 |
| H | 5.4383624 | 0.7229542  | 6.5615740 |
| H | 4.4875343 | 0.5421248  | 8.0371550 |
| H | 4.4925777 | 2.0934248  | 7.1739995 |

**aTS3** : rotonation of **aB<sup>-</sup>** with base **2aH<sup>+</sup>**  
100

Energy = -2219.061450369

|   |            |            |            |
|---|------------|------------|------------|
| N | -5.2599099 | 0.2583664  | 1.6582987  |
| N | -4.2338148 | 0.4294126  | 2.5184426  |
| N | -4.6511111 | 0.1644822  | 0.4771386  |
| C | -2.9779008 | 0.4187010  | 1.9037359  |
| C | -4.5463602 | 0.7887581  | 3.8929166  |
| C | -5.4244674 | 0.0248653  | -0.7315108 |
| C | -3.3053271 | 0.2642936  | 0.5441824  |
| C | -1.7184339 | 0.6451784  | 2.5198361  |
| H | -4.4261669 | -0.0666359 | 4.5625455  |
| H | -5.5741958 | 1.1494773  | 3.9142808  |
| H | -3.8520720 | 1.5745662  | 4.1994243  |
| C | -6.0327592 | -1.2038406 | -1.0064857 |
| C | -5.4864541 | 1.1274953  | -1.5961821 |
| H | -2.6793848 | 0.2378901  | -0.3288057 |
| C | -1.3868460 | 0.2323337  | 3.8748317  |
| N | -0.6650738 | 1.1577426  | 1.7787811  |
| C | -6.7365110 | -1.3113442 | -2.2107544 |
| C | -5.9285168 | -2.3706780 | -0.0577907 |
| C | -6.2001999 | 0.9635906  | -2.7848522 |
| C | -4.8129913 | 2.4354001  | -1.2635879 |
| C | -2.0062802 | -0.8768793 | 4.4979107  |
| C | -0.3432594 | 0.8688688  | 4.5898552  |
| N | -0.9017914 | 1.4492412  | 0.5432722  |
| C | -6.8295540 | -0.2446824 | -3.1090043 |
| H | -7.2124407 | -2.2585596 | -2.4542975 |
| H | -6.5454833 | -2.2108562 | 0.8328649  |
| H | -6.2630003 | -3.2880869 | -0.5478268 |
| H | -4.8975457 | -2.5144210 | 0.2836905  |
| H | -6.2655175 | 1.8037185  | -3.4727230 |
| H | -5.1460964 | 3.2143664  | -1.9535609 |
| H | -5.0483464 | 2.7529392  | -0.2420802 |
| H | -3.7221346 | 2.3542785  | -1.3339964 |
| C | -1.6293337 | -1.3019169 | 5.7690363  |
| H | -2.7599701 | -1.4400271 | 3.9523484  |
| C | 0.0419975  | 0.4296067  | 5.8518191  |
| H | 0.1584010  | 1.7123113  | 4.1255858  |
| C | 0.2393675  | 1.8048384  | -0.1839282 |
| C | -7.5951555 | -0.3858224 | -4.4013244 |
| C | -0.6021922 | -0.6535686 | 6.4626381  |
| H | -2.1251181 | -2.1628397 | 6.2119865  |
| H | 0.8466267  | 0.9440919  | 6.3728647  |
| C | 0.0742868  | 2.2839964  | -1.5431232 |
| H | 1.0723980  | 2.2677500  | 0.3577243  |
| H | -6.9804835 | -0.0831848 | -5.2562332 |
| H | -8.4850519 | 0.2549757  | -4.3984642 |
| H | -7.9199171 | -1.4181463 | -4.5564393 |

|   |            |            |            |
|---|------------|------------|------------|
| H | -0.3046487 | -0.9894056 | 7.4520880  |
| O | 0.9434832  | 2.8817360  | -2.1900961 |
| O | -1.1204905 | 1.9040269  | -2.1074672 |
| C | -1.2384703 | 2.0943246  | -3.5399621 |
| H | -1.5652096 | 3.1237223  | -3.7311700 |
| H | -0.2531340 | 1.9570278  | -3.9925758 |
| C | -2.2405719 | 1.0768814  | -4.0540404 |
| H | -1.8895925 | 0.0615858  | -3.8506824 |
| H | -3.2213648 | 1.2089903  | -3.5879225 |
| H | -2.3573624 | 1.1935029  | -5.1375196 |
| H | 0.8047639  | 0.5140438  | -0.4150154 |
| C | 1.2303974  | -0.8228420 | -0.4571340 |
| C | 2.5930703  | -0.7479724 | -0.0211108 |
| C | 0.8891877  | -1.2637983 | -1.8243059 |
| H | 0.5713289  | -1.2438830 | 0.3040735  |
| N | 2.9349802  | -0.5837205 | 1.3147830  |
| C | 3.8246136  | -0.6510616 | -0.6726628 |
| C | -0.1740352 | -2.1648610 | -2.0212143 |
| C | 1.5182327  | -0.7376438 | -2.9688513 |
| N | 4.2502194  | -0.4051001 | 1.5168078  |
| C | 2.0216031  | -0.6056948 | 2.4517099  |
| N | 4.7582717  | -0.4470093 | 0.2911595  |
| H | 4.0944585  | -0.7131939 | -1.7124881 |
| C | -0.5711320 | -2.5488170 | -3.2996058 |
| H | -0.6911235 | -2.5657033 | -1.1519962 |
| C | 1.1255066  | -1.1265266 | -4.2480948 |
| H | 2.2878101  | 0.0210133  | -2.8606415 |
| H | 2.6025265  | -0.3847871 | 3.3453913  |
| H | 1.5710364  | -1.5991191 | 2.5340689  |
| H | 1.2283546  | 0.1415694  | 2.3005021  |
| C | 6.1742904  | -0.2362141 | 0.0949622  |
| C | 0.0831639  | -2.0394209 | -4.4247167 |
| H | -1.3962711 | -3.2463470 | -3.4194724 |
| H | 1.6250408  | -0.6981469 | -5.1134063 |
| C | 6.6190155  | 1.0753164  | -0.1068617 |
| C | 7.0222403  | -1.3496822 | 0.0991257  |
| H | -0.2273325 | -2.3343598 | -5.4229530 |
| C | 7.9898230  | 1.2559736  | -0.3125635 |
| C | 5.6635859  | 2.2414289  | -0.0974120 |
| C | 8.3830240  | -1.1119858 | -0.1094965 |
| C | 6.4903911  | -2.7438812 | 0.3127315  |
| C | 8.8835788  | 0.1795510  | -0.3133083 |
| H | 8.3649725  | 2.2638443  | -0.4743327 |
| H | 5.1654167  | 2.3320442  | 0.8742000  |
| H | 6.1979904  | 3.1721458  | -0.2984089 |
| H | 4.8801059  | 2.1241382  | -0.8546768 |
| H | 9.0661656  | -1.9583408 | -0.1118612 |
| H | 7.3137052  | -3.4584121 | 0.3776981  |
| H | 5.9026636  | -2.8069233 | 1.2345573  |
| H | 5.8373468  | -3.0489422 | -0.5131750 |
| C | 10.3623898 | 0.4069730  | -0.5054713 |
| H | 10.8138834 | -0.4009375 | -1.0893937 |
| H | 10.8744683 | 0.4371328  | 0.4645251  |
| H | 10.5534390 | 1.3567308  | -1.0126555 |

**aTS4** : ring-closing N-to-C addition of **aC**  
57

Energy = -1317.624708427

|   |            |            |            |
|---|------------|------------|------------|
| N | 0.1127821  | -2.0688654 | -0.8154933 |
| N | 1.3712533  | -1.8669370 | -0.5104010 |
| N | -0.5646667 | -1.1631127 | -0.0628708 |
| C | 1.6078218  | -0.8493205 | 0.4030657  |
| C | 2.3776286  | -2.6678683 | -1.2024547 |
| C | -1.9897561 | -1.0810580 | -0.1751425 |
| C | 0.2886933  | -0.2487666 | 0.6275633  |
| C | 2.6203662  | 0.1783487  | 0.1562508  |
| H | 1.8664813  | -3.2453638 | -1.9707288 |
| H | 2.8732766  | -3.3301191 | -0.4901443 |
| H | 3.1134636  | -1.9977634 | -1.6508237 |
| C | -2.5810951 | -0.6682083 | -1.3779238 |
| C | -2.7566899 | -1.4208480 | 0.9528823  |
| H | -0.1031899 | 0.0177874  | 1.6034009  |
| C | 4.0647921  | -0.0154368 | 0.0948664  |
| H | 0.0608120  | 2.0255300  | -1.7674710 |
| C | -3.9763079 | -0.5670065 | -1.4180371 |
| C | -1.7652076 | -0.3645105 | -2.6077231 |
| C | -4.1446109 | -1.3046847 | 0.8623539  |
| C | -2.1078143 | -1.9221224 | 2.2176012  |
| C | 4.9034624  | 0.9171247  | -0.5478559 |
| C | 4.6555864  | -1.1449141 | 0.6903941  |
| C | -4.7725697 | -0.8693017 | -0.3109184 |
| H | -4.4479833 | -0.2334000 | -2.3398032 |
| H | -1.5828640 | -1.2792015 | -3.1835555 |
| H | -2.2942422 | 0.3442951  | -3.2493362 |
| H | -0.7876095 | 0.0513146  | -2.3553759 |
| H | -4.7494889 | -1.5661661 | 1.7280953  |
| H | -2.8668482 | -2.2786317 | 2.9180914  |
| H | -1.4133055 | -2.7415706 | 2.0049161  |
| H | -1.5316452 | -1.1356224 | 2.7189201  |
| C | 6.2781710  | 0.7151045  | -0.6003143 |
| H | 4.4551544  | 1.7923161  | -1.0079790 |
| C | 6.0336267  | -1.3471048 | 0.6303086  |
| H | 4.0216716  | -1.8533214 | 1.2174879  |
| C | -6.2713454 | -0.7063020 | -0.3667155 |
| C | 6.8534855  | -0.4201912 | -0.0160646 |
| H | 6.9084741  | 1.4429919  | -1.1045894 |
| H | 6.4687544  | -2.2261829 | 1.0982702  |
| H | -6.5674768 | 0.2732610  | 0.0303416  |
| H | -6.7751594 | -1.4688703 | 0.2353078  |
| H | -6.6388428 | -0.7709548 | -1.3948037 |
| H | 7.9276522  | -0.5753050 | -0.0619402 |
| N | 2.0675290  | 1.3537853  | -0.0981558 |
| N | 0.7502560  | 1.4002550  | 0.1664620  |
| C | 0.0307086  | 2.3172646  | -0.7087502 |
| C | -1.4301767 | 2.4948467  | -0.3469157 |
| O | -2.2528366 | 2.9269702  | -1.1365966 |
| O | -1.7119469 | 2.1613745  | 0.9240307  |
| C | -3.1199026 | 2.3105434  | 1.3078471  |
| H | -3.4163959 | 3.3442060  | 1.1128704  |
| H | -3.7066776 | 1.6468265  | 0.6678327  |

|   |            |           |            |
|---|------------|-----------|------------|
| H | 0.5069090  | 3.3049040 | -0.6412097 |
| C | -3.2293014 | 1.9461485 | 2.7722204  |
| H | -2.9066659 | 0.9162200 | 2.9449269  |
| H | -2.6246244 | 2.6161366 | 3.3904703  |
| H | -4.2744282 | 2.0348767 | 3.0864342  |

**aTS5** : N..C ring-opening of **aD**

57

Energy = -1317.628128766

|   |            |            |            |
|---|------------|------------|------------|
| N | 0.6162687  | -1.9568175 | 1.1997892  |
| N | 1.7527490  | -1.3449241 | 1.4169499  |
| N | -0.3431041 | -1.0553132 | 1.0835359  |
| C | 1.7548598  | 0.0564001  | 1.2336792  |
| C | 2.9301864  | -2.1854303 | 1.6096618  |
| C | -1.5276668 | -1.4295232 | 0.3806014  |
| C | 0.3498569  | 0.5032182  | 1.0713746  |
| C | 2.4642434  | 0.6142874  | 0.0862789  |
| H | 2.5905629  | -3.2190999 | 1.6574811  |
| H | 3.4300984  | -1.9025889 | 2.5380838  |
| H | 3.6176440  | -2.0519707 | 0.7713577  |
| C | -1.4698313 | -1.9341632 | -0.9344226 |
| C | -2.7541105 | -1.1724948 | 1.0153330  |
| H | -0.2448566 | 0.9522362  | 1.8609800  |
| C | 3.8852035  | 0.4768164  | -0.2440891 |
| H | -1.1122813 | 0.8820061  | -1.4675274 |
| C | -2.6755789 | -2.1861446 | -1.5922445 |
| C | -0.1575430 | -2.1575687 | -1.6468010 |
| C | -3.9327543 | -1.4494426 | 0.3178338  |
| C | -2.7964646 | -0.6123980 | 2.4143565  |
| C | 4.3126930  | 0.4711544  | -1.5834005 |
| C | 4.8490207  | 0.3680248  | 0.7727723  |
| C | -3.9160587 | -1.9525401 | -0.9854244 |
| H | -2.6435226 | -2.5609633 | -2.6137357 |
| H | 0.5186480  | -1.3050635 | -1.5193670 |
| H | 0.3635669  | -3.0402747 | -1.2622922 |
| H | -0.3322690 | -2.3022016 | -2.7162593 |
| H | -4.8870829 | -1.2614728 | 0.8051860  |
| H | -3.8141856 | -0.6522515 | 2.8116573  |
| H | -2.1333575 | -1.1700329 | 3.0830545  |
| H | -2.4679443 | 0.4337162  | 2.4315082  |
| C | 5.6650934  | 0.3545332  | -1.8939126 |
| H | 3.5686262  | 0.5507291  | -2.3699760 |
| C | 6.2015484  | 0.2462159  | 0.4591410  |
| H | 4.5266578  | 0.3964976  | 1.8099830  |
| C | -5.2005228 | -2.2337065 | -1.7255665 |
| C | 6.6158188  | 0.2375919  | -0.8749081 |
| H | 5.9798917  | 0.3462543  | -2.9339734 |
| H | 6.9344776  | 0.1667248  | 1.2574192  |
| H | -6.0682739 | -1.9060192 | -1.1463021 |
| H | -5.3110780 | -3.3060612 | -1.9267898 |
| H | -5.2171964 | -1.7196698 | -2.6933211 |
| H | 7.6699263  | 0.1416132  | -1.1193723 |
| N | 1.6662229  | 1.3296412  | -0.6831177 |
| N | 0.4205237  | 1.3674747  | -0.0694617 |
| C | -0.6948476 | 1.7344323  | -0.9147818 |

|   |            |           |            |
|---|------------|-----------|------------|
| C | -1.8232978 | 2.4002116 | -0.1447466 |
| O | -1.7840431 | 2.7512307 | 1.0195537  |
| O | -2.8829690 | 2.5572981 | -0.9600636 |
| C | -4.0654074 | 3.2110764 | -0.3855514 |
| H | -3.7254569 | 3.9690481 | 0.3228099  |
| H | -4.5387346 | 3.6891638 | -1.2443739 |
| H | -0.3190560 | 2.4462005 | -1.6556265 |
| C | -4.9770456 | 2.1890882 | 0.2682968  |
| H | -5.2577893 | 1.4081509 | -0.4440747 |
| H | -4.4889095 | 1.7248002 | 1.1285954  |
| H | -5.8877076 | 2.6898785 | 0.6142597  |

## 6. References

1. H. Keipour, A. Jalba, L. Delage-Laurin, T. Ollevier, *J. Org. Chem.*, 2017, **82**, 3000.
2. H. M. L. Davies, T. Hansen, M. R. Churchill, *J. Am. Chem. Soc.*, 2000, **122**, 3063.
3. Q. Liang, K. Hayashi, K. Rabeda, J. L. Jimenez-Santiago, D. Song, *Organometallics*, 2020, **39**, 2320.
4. Q. Liang, K. Hayashi, Y. Zeng, J. L. Jimenez-Santiago, D. Song, *Chem. Commun.*, 2021, **57**, 6137.
5. M. Presset, D. Mailhol, Y. Coquerel, J. Rodriguez, *Synthesis*, 2011, 2549.
6. D. Rottschäfer, M. K. Sharma, B. Neumann, H. G. Stammler, D. M. Andrada, R. S. Ghadwal, *Chem. Eur. J.*, 2019, **25**, 8127.
7. I. C. Watson, A. Schumann, H. Yu, E. C. Davy, R. McDonald, M. J. Ferguson, C. Hering-Junghans, E. Rivard, *Chem. Eur. J.*, 2019, **25**, 9678.
8. K. Powers, C. Hering-Junghans, R. McDonald, M. J. Ferguson, E. Rivard, *Polyhedron*, 2016, **108**, 8.
9. M. M. Hansmann, P. W. Antoni, H. Pesch, *Angew. Chem., Int. Ed.*, 2020, **59**, 5782.
10. J. Bouffard, B. K. Keitz, R. Tonner, G. Guisado-Barrios, G. Frenking, R. H. Grubbs, G. Bertrand, *Organometallics*, 2011, **30**, 2617.
11. E. Aldeco-Perez, A. J. Rosenthal, B. Donnadiu, P. Parameswaran, G. Frenking, G. Bertrand, *Science*, 2009, **326**, 556.
12. *Apex3 Software Package*; Bruker AXS Inc.: Madison, WI, 2016.
13. G. M. Sheldrick, Crystal structure refinement with SHELXL. *Acta Crystallogr., Sect. C: Struct. Chem.*, 2015, **C71**, 3.
14. <http://shelx.uni-ac.gwdg.de/SHELX/index.php>. (accessed on January 30, 2017).
15. A. L. Spek, *J. Appl. Crystallogr.*, 2003, **36**, 7.
16. TURBOMOLE, V 7.4, TURBOMOLE GmbH, Karlsruhe, 2019, See <http://www.turbomole.com>.
17. J. Tao, J. P. Perdew, V. N. Staroverov, G. E. Scuseria, *Phys. Rev. Lett.*, 2003, **91**, 146401.

18. (a) S. Grimme, J. Antony, S. Ehrlich, H. Krieg, *J. Chem. Phys.*, 2010, **132**, 154104; (b) S. Grimme, S. Ehrlich, L. Goerigk, *J. Comput. Chem.*, 2011, **32**, 1456.
19. F. Weigend, R. Ahlrichs, *Phys. Chem. Chem. Phys.*, 2005, **7**, 3297.
20. A. Klamt, G. Schüürmann, *J. Chem. Soc. Perkin Trans.*, 1993, **2**, 799.
21. F. Weigend, *Phys. Chem. Chem. Phys.*, 2006, **8**, 1057.
22. S. Grimme, *Chem. Eur. J.*, 2012, **18**, 9955.
23. F. Eckert, A. Klamt, *AIChE J.*, 2002, **48**, 369.
24. F. Eckert, A. Klamt, COSMOtherm, Version C3.0, Release 16.01, COSMOlogic GmbH & Co., Leverkusen, Germany, 2015.
25. Y. Zhao, D. G. Truhlar, *J. Phys. Chem. A*, 2005, **109**, 5656.
26. (a) Z.-W. Qu, H. Zhu, N. A. Zhukova, S. A. Katsyuba, V. A. Mamedov, S. Grimme, *ChemCatChem*, 2021, **13**, 1503; (b) Z.-W. Qu, H. Zhu, S. Grimme, *ChemCatChem*, 2021, **13**, 3401; (c) Z.-W. Qu, H. Zhu, S. Grimme, *ChemCatChem*, 2021, **13**, 2132; (d) Z.-W. Qu, H. Zhu, S. Grimme, *ChemCatChem*, 2021, **13**, 207; (e) Z.-W. Qu, H. Zhu, S. Grimme, *ChemCatChem*, 2020, **12**, 3656; (f) Z.-W. Qu, H. Zhu, S. A. Katsyuba, V. L. Mamedova, V. A. Mamedov, S. Grimme, *ChemistryOpen*, 2020, **9**, 743; (g) Z.-W. Qu, H. Zhu, S. Grimme, *ChemCatChem*, 2020, **12**, 5369; (h) Z.-W. Qu, H. Zhu, S. Grimme, *ChemCatChem*, 2020, **12**, 6186; (i) H. Zhu, Z.-W. Qu, S. Grimme, *Chem. Eur. J.*, 2019, **25**, 4670; (j) H. Zhu, Z.-W. Qu, S. Grimme, *Eur. J. Org. Chem.*, 2019, 4609; (k) Z.-W. Qu, H. Zhu, S. Grimme, *ChemistryOpen*, 2019, **8**, 807.
27. L. Goerigk, A. Hansen, C. Bauer, S. Ehrlich, A. Najibi, S. Grimme, *Phys. Chem. Chem. Phys.*, 2017, **19**, 32184.
28. G. Schreckenbach, T. Ziegler, *J. Phys. Chem.*, 1995, **99**, 606.
